# Supplementary material for: The role of digital device use on the risk of migraine: a univariable and multivariable Mendelian randomization study
Source: Frontiers journal article supplement (doi:10.3389/fneur.2024.1462414), 2024-10-30
Supplement: Image_1.pdf [file Image_1.pdf]

# Supplementary Figure S1. MR Leave-One-Out analysis for assessing causal effect of digital devices use on overall migraine risk

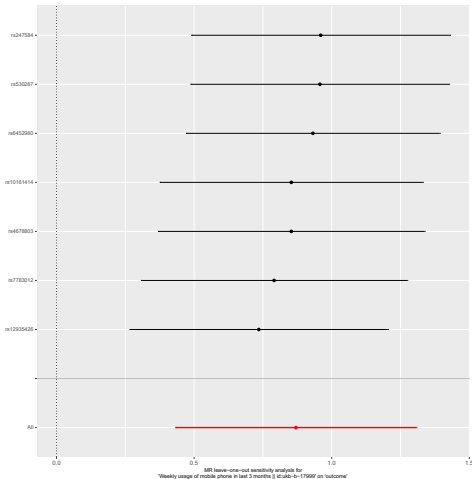

(A) Mobile phone use--FinnGen

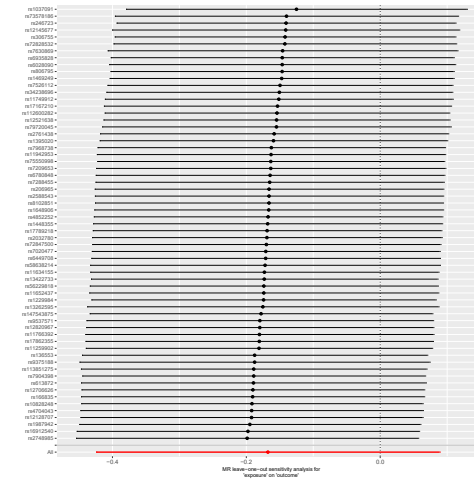

(B) Computer use--FinnGen

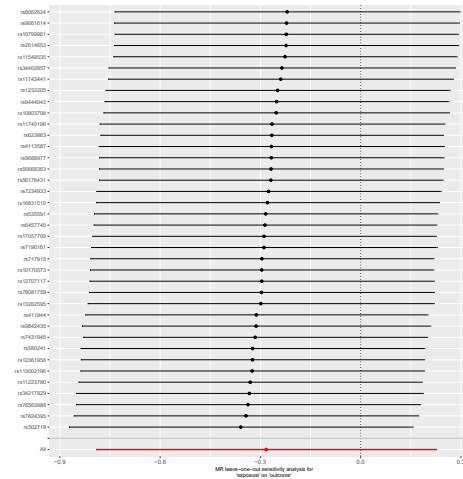

(C) Playing computer games--FinnGen

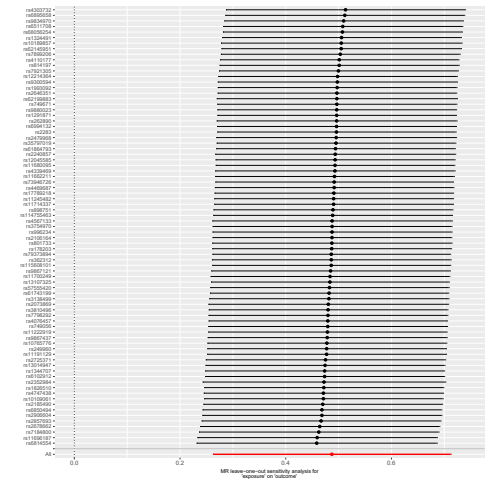

(D) Watching television--FinnGen

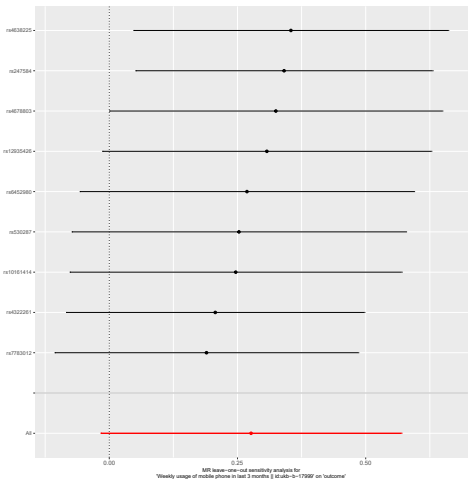

(E) Mobile phone use--IHGC

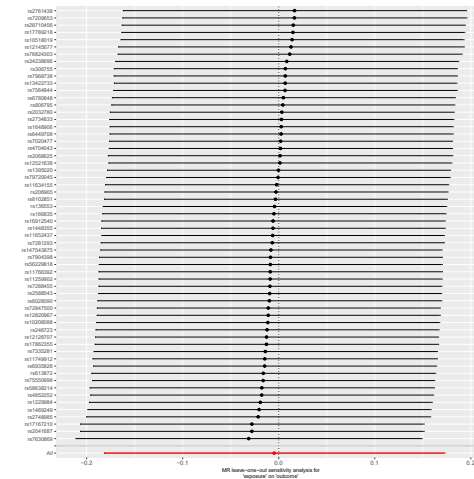

(F) Computer use--IHGC

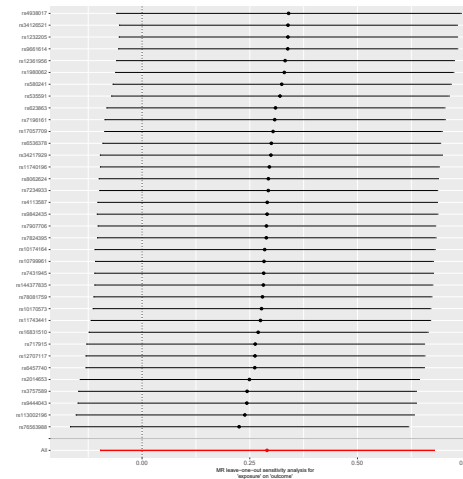

(G) Playing computer games--IHGC

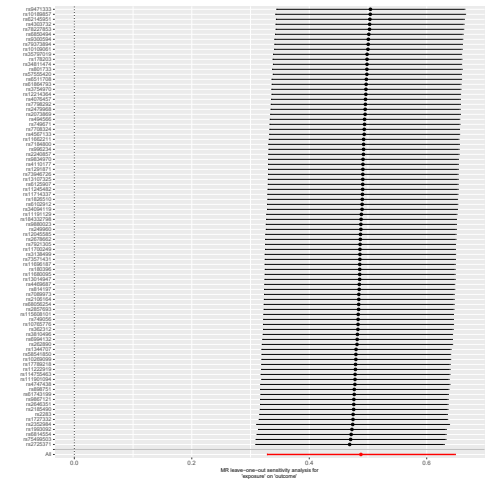

(H) Watching television--IHGC

## Supplementary Figure S2. MR Leave-One-Out analysis for assessing causal effect of digital devices use on migraine with aura risk

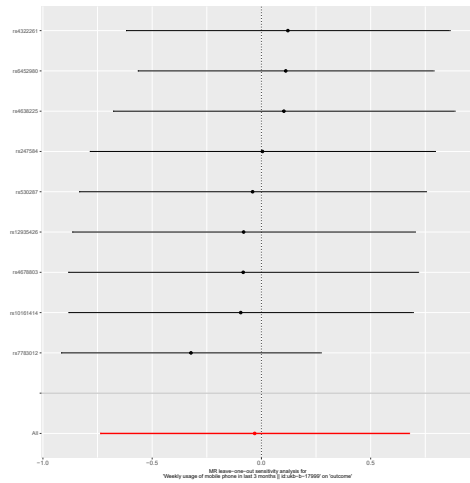

(A) Mobile phone use--FinnGen

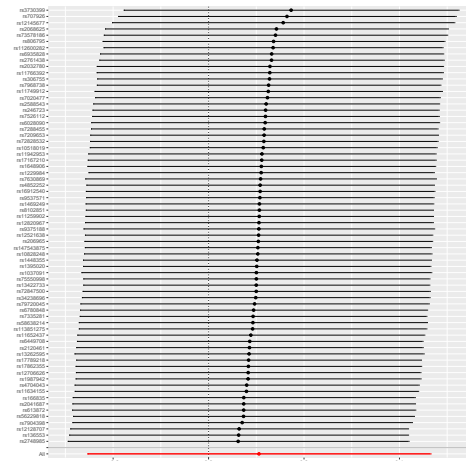

(B) Computer use--FinnGen

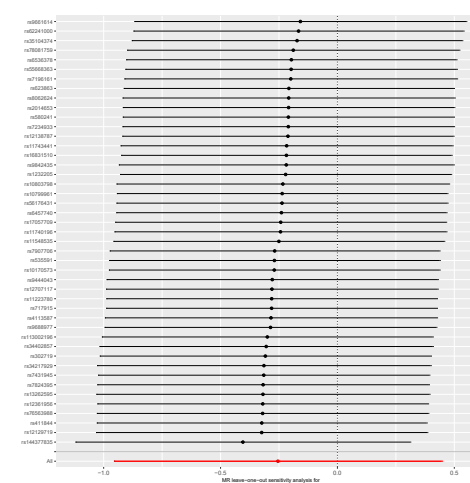

(C) Playing computer games--FinnGen

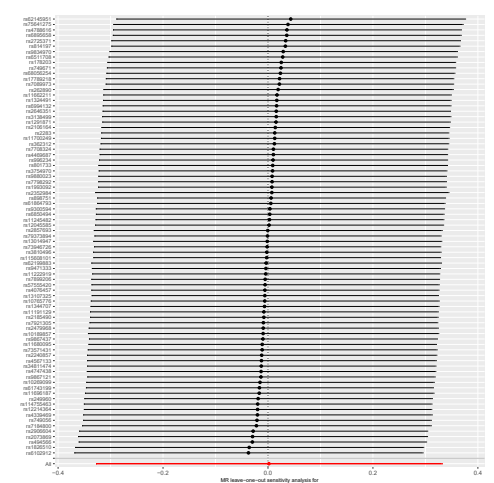

(D) Watching TV--FinnGen

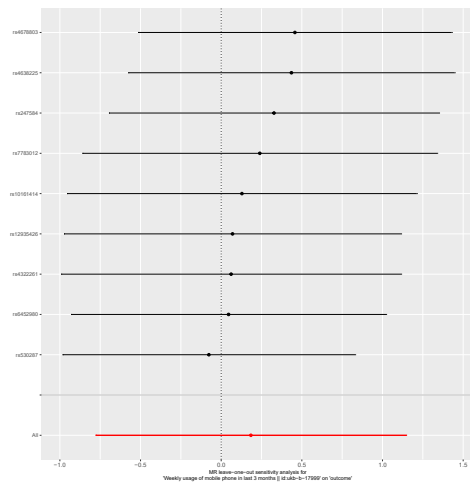

(E) Mobile phone use--IHGC

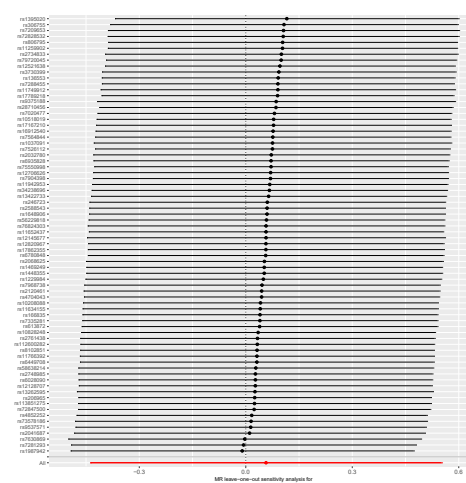

(F) Computer use--IHGC

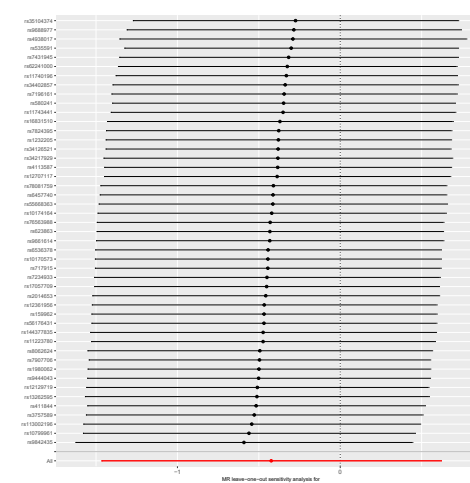

(G) Playing computer games--IHGC

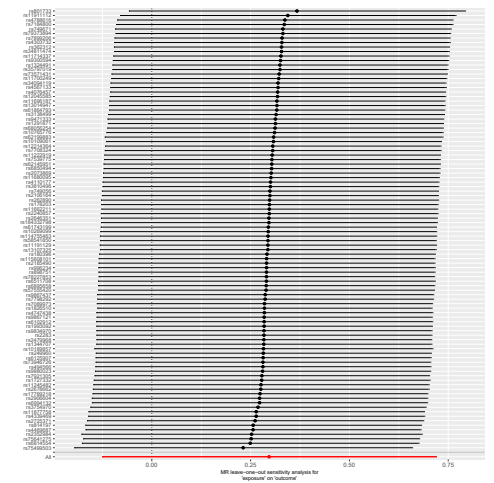

(H) Watching TV--IHGC

# Supplementary Figure S3. MR Leave-One-Out analysis for assessing causal effect of digital devices use on migraine with no aura risk

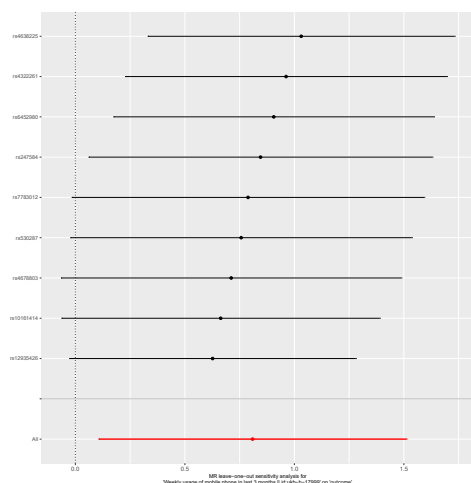

(A) Mobile phone use--FinnGen

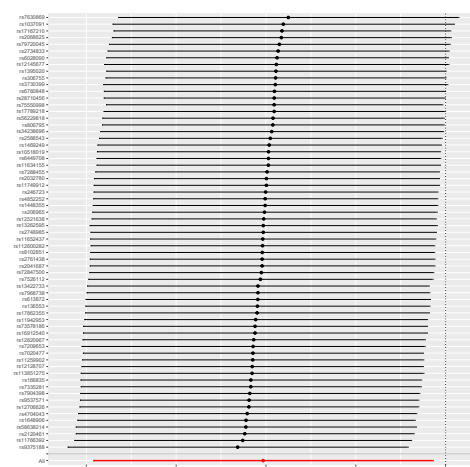

(B) Computer use--FinnGen

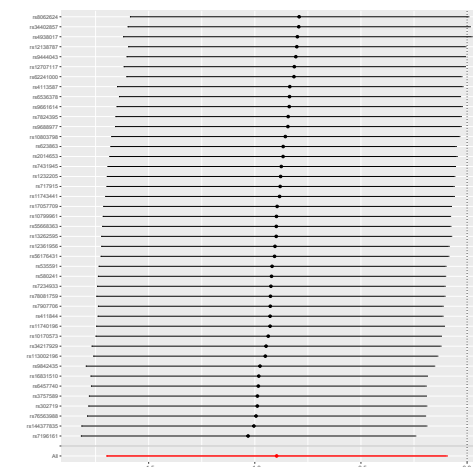

(C) Plays computer games--FinnGen

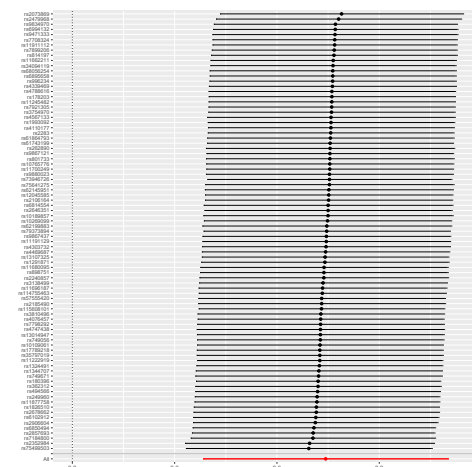

(D) Watching television--FinnGen

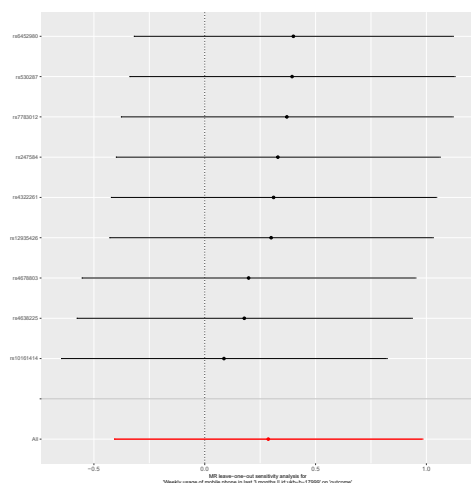

(E) Mobile phone use--IHGC

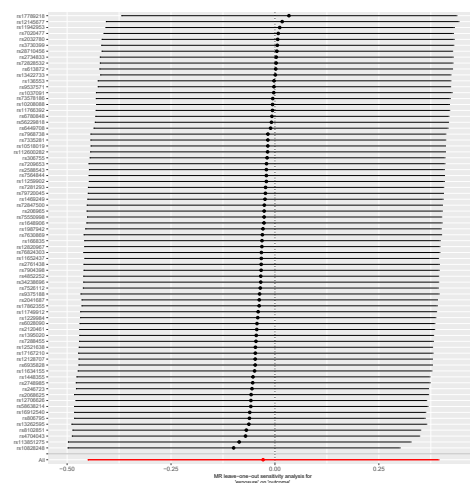

(F) Computer use--IHGC

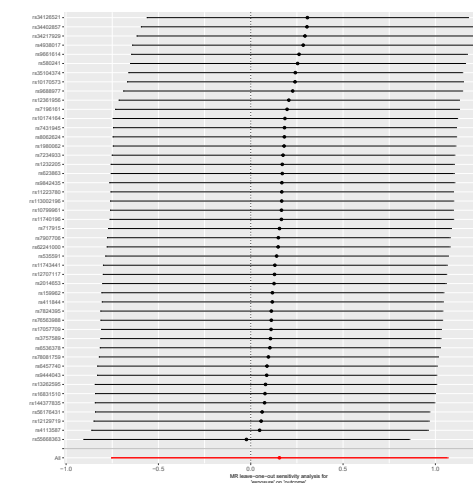

(G) Playing computer games--IHGC

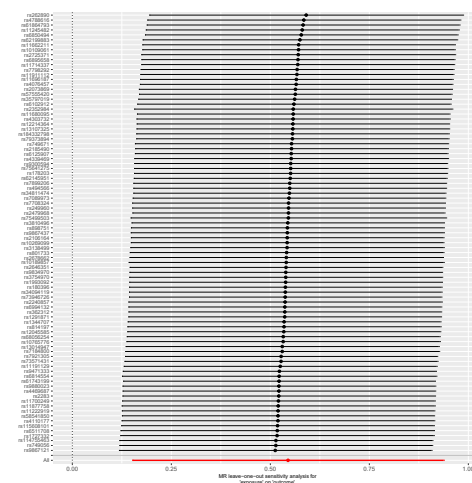

(H) Watching television--IHGC

Supplementary Figure S4. Scatter Plot of instrumental variable estimates for digital devices use and overall migraine risk.

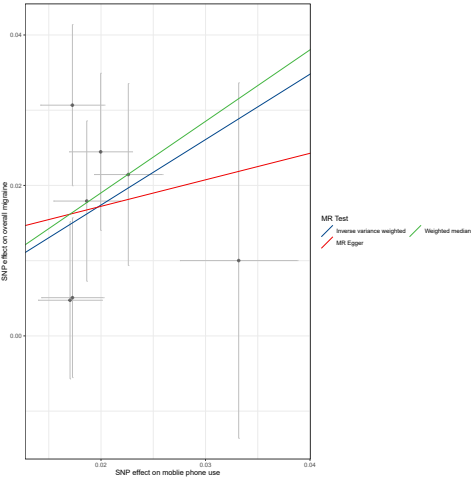

(A) Mobile phone use--FinnGen

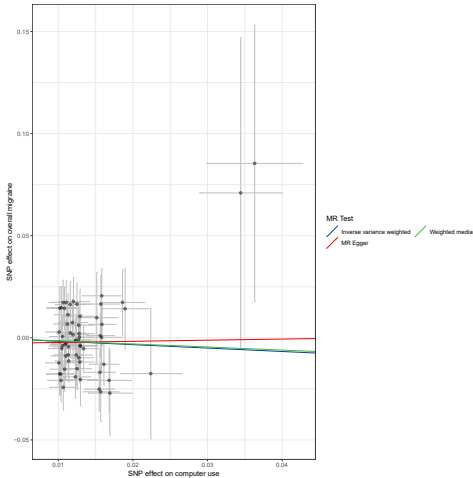

(B) Computer use--FinnGen

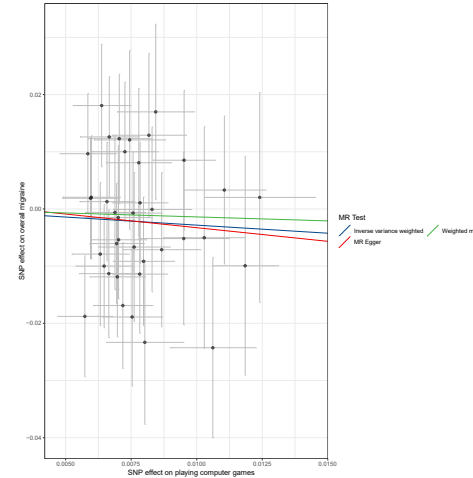

(C) Playing computer games--FinnGen

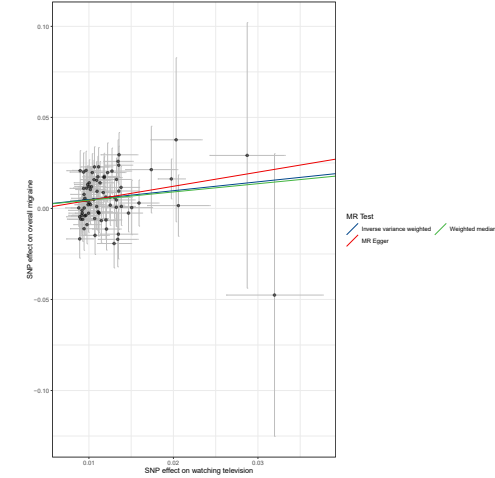

(D) Watching television--FinnGen

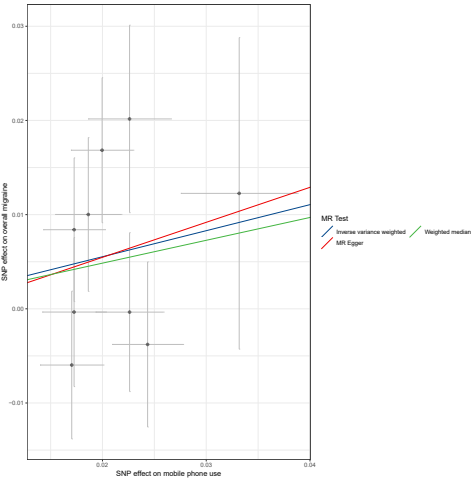

(E) Mobile phone use--IHGC

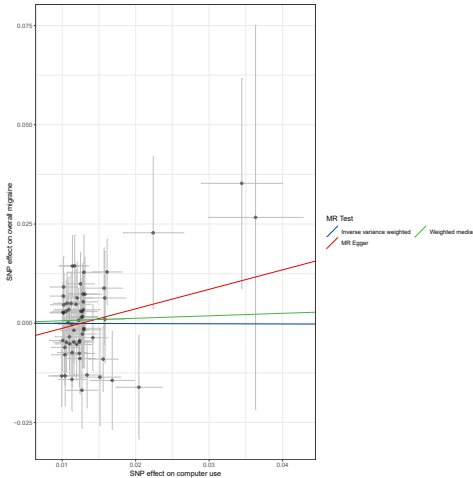

(F) Computer use--IHGC

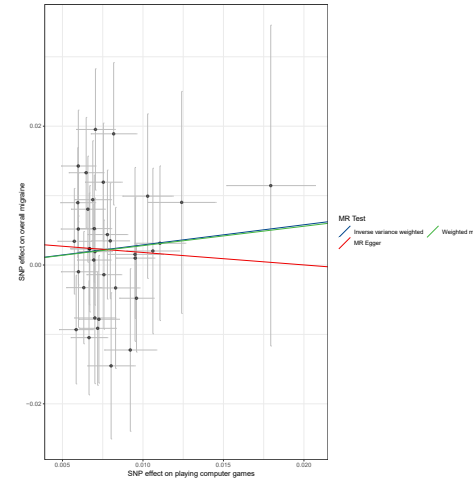

(G) Playing computer games--IHGC

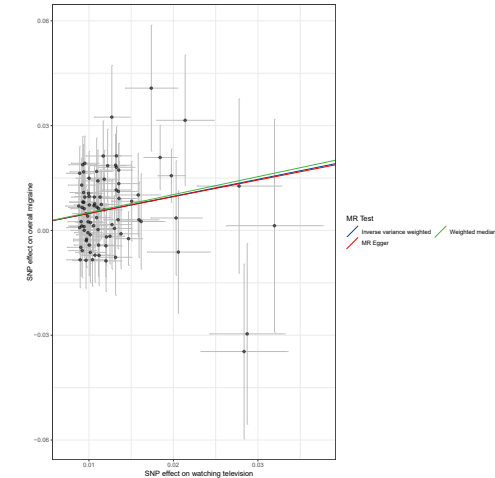

(H) Watching television--IHGC

Supplementary Figure S5. Scatter Plot of instrumental variable estimates for digital devices use and migraine with aura risk

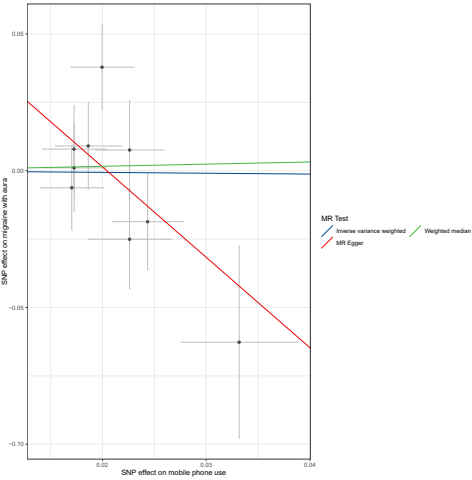

(A) Mobile phone use--FinnGen

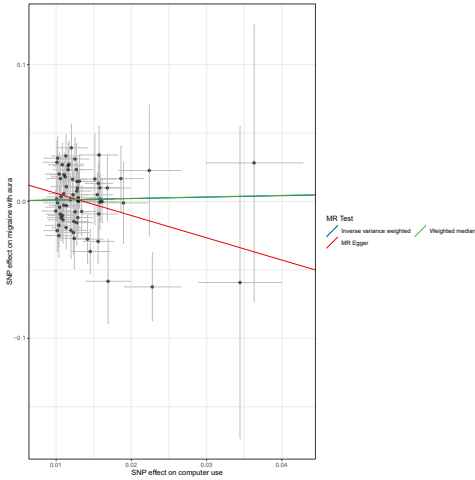

(B) Computer use--FinnGen

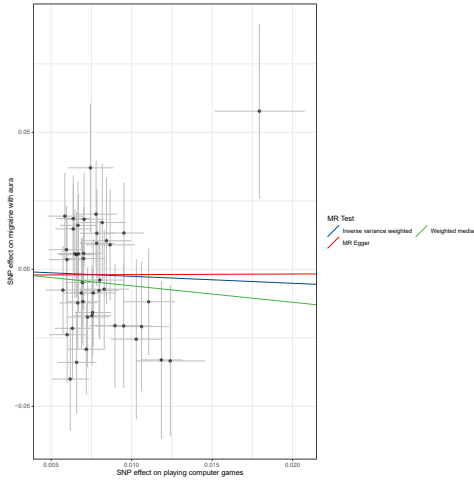

(C) Playing computer games--FinnGen

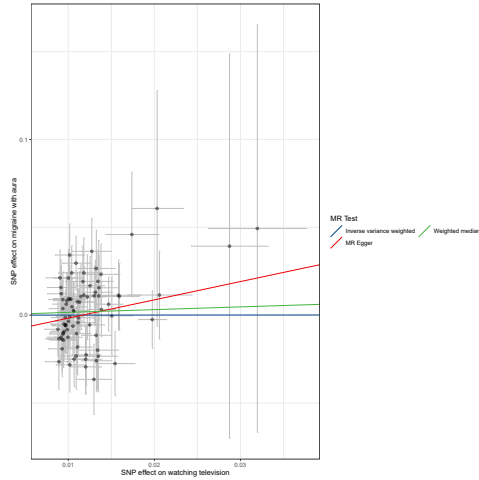

(D) Watching television--FinnGen

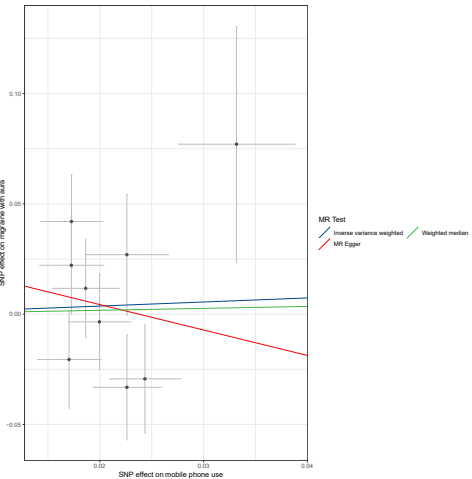

(E) Mobile phone use--IHGC

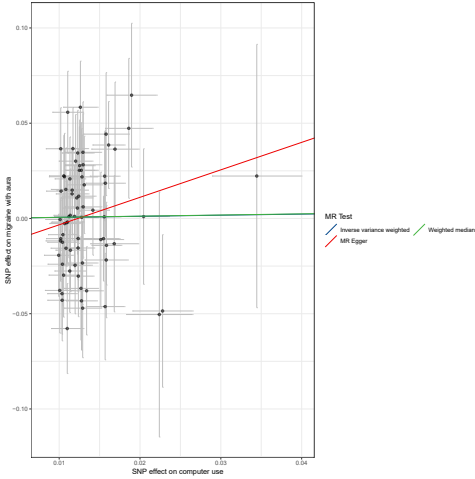

(F) Computer use--IHGC

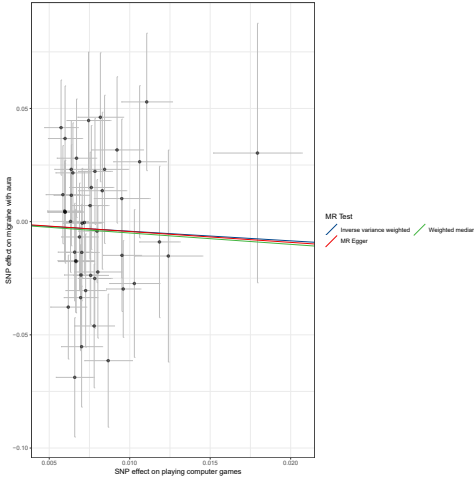

(G) Playing computer games--IHGC

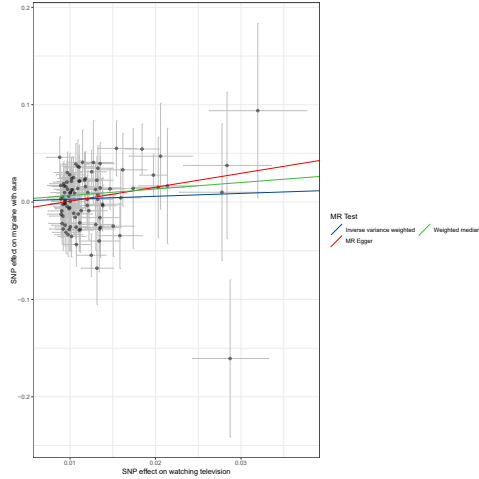

(H) Watching television--IHGC

Supplementary Figure S6. Scatter Plot of instrumental variable estimates for digital devices use and migraine with no aura risk

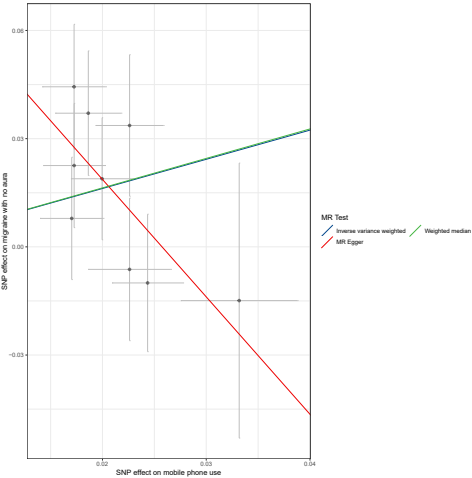

(A) Mobile phone use--FinnGen

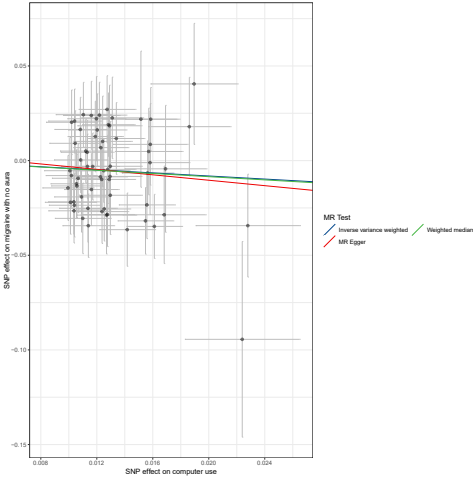

(B) Computer use--FinnGen

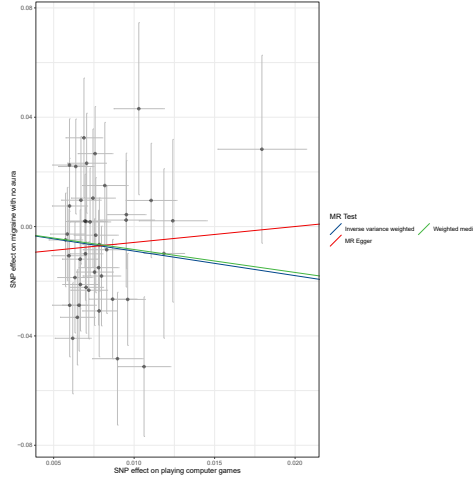

(C) Playing computer games--FinnGen

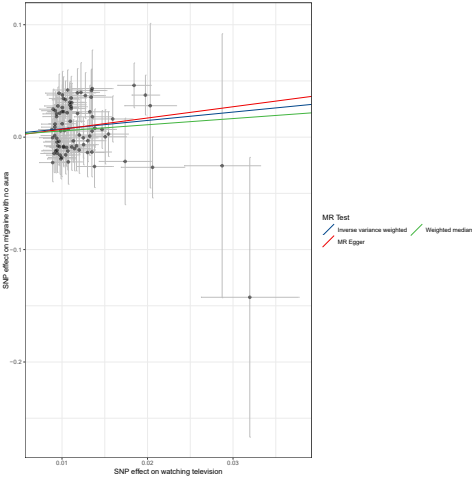

(D) Watching television--FinnGen

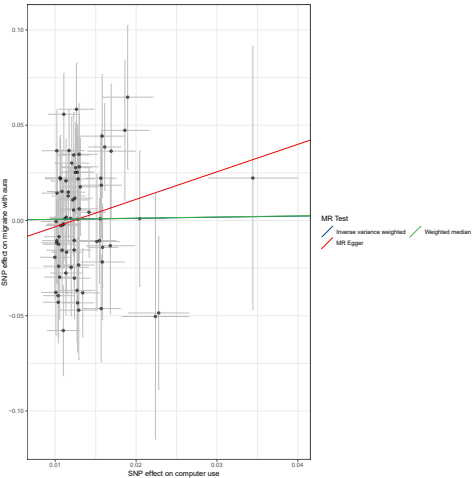

(E) Mobile phone use--IHGC

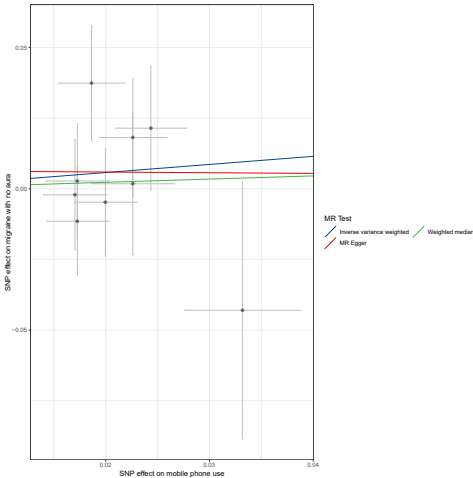

(F) Computer use--IHGC

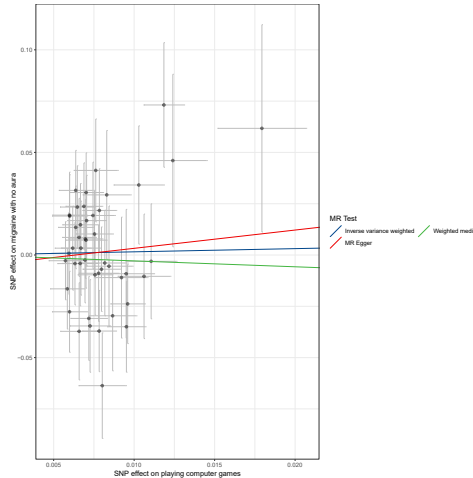

(G) Playing computer games--IHGC

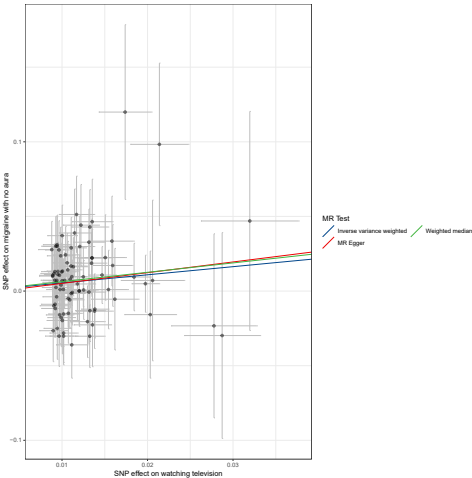

(H) Watching television--IHGC
