# Supplementary material for: The role of digital device use on the risk of migraine: a univariable and multivariable Mendelian randomization study
Source: Front Neurol. 2024 Oct 30;15:1462414. doi: 10.3389/fneur.2024.1462414 (PMC11557339; doi:10.3389/fneur.2024.1462414)
Supplement: Supplementary file 3 [file Table_3.xls]

## Sheet: Sheet1
Table 3, Supplementary Table 3.1 to 3.5
Table 3, Supplementary Table 3.1. Association of mobile phone use instrumental variants with risk of migraine across 2 databases
Table 3, Supplementary Table 3.2. Association of computer use instrumental variants with risk of migraine across 2 databases
Table 3, Supplementary Table 3.3. Association of playing computer games instrumental variants with risk of migraine across 2 databases
Table 3, Supplementary Table 3.4. Association of watching television instrumental variants with risk of migraine across 2 databases
Table 3, Supplementary Table 3.5. The members of the International Headache Genetics Consortium (IHGC)

## Sheet: 3.1
Supplementary Table 3.1. Association of mobile phone use in last 3 months instrumental variants with risk of migraine across 2 databases
SNP	EA	OA	Eaf	R2	FSTAT	Exposure			Overall migraine
									GWAS from FinnGen
						Beta	Se	P-value	Beta	Se	P-value
rs10161414	C	T	0.31569	8.87975e-05	34.3343	-0.0186337	0.00318005	4.6e-09	-0.0179221	0.0106624	0.0927876
rs12935426	G	A	0.362205	8.2221e-05	31.7912	-0.0172618	0.00306148	1.7e-08	-0.0306706	0.0107144	0.00420223
rs4322261	A	G	0.836102	8.34288e-05	32.2583	-0.0226087	0.00398065	1.3e-08	0.0303375	0.0122082	0.0129548
rs4678803	A	G	0.283722	0.000123764	47.8559	0.0226117	0.00326862	4.6e-12	0.0214499	0.0120952	0.0761588
rs530287	C	T	0.518722	8.71994e-05	33.7163	-0.0172677	0.00297381	6.4e-09	-0.00508098	0.0106241	0.63247
rs6452980	G	A	0.923657	9.01162e-05	34.8442	0.0331761	0.00562029	3.6e-09	0.0100131	0.0236304	0.671755
rs7783012	A	G	0.591405	0.000114314	44.2017	0.0199641	0.00300282	3e-11	0.0244679	0.010448	0.0191871
SNP	EA	OA	Eaf	R2	FSTAT	Exposure			Overall migraine
									GWAS from IHGC
						Beta	Se	P-value	Beta	Se	P-value
rs10161414	C	T	0.31569	8.87975e-05	34.3343	-0.0186337	0.00318005	4.6e-09	-0.010015	0.008167	0.220059
rs12935426	G	A	0.362205	8.2221e-05	31.7912	-0.0172618	0.00306148	1.7e-08	0.000345	0.007913	0.965201
rs247584	C	A	0.633091	8.06995e-05	31.2029	0.0170353	0.00304966	2.3e-08	-0.005971	0.007847	0.446675
rs4322261	A	G	0.836102	8.34288e-05	32.2583	-0.0226087	0.00398065	1.3e-08	-0.020162	0.009955	0.042853
rs4638225	A	G	0.249277	0.000131201	50.7323	0.0243478	0.00341835	1.1e-12	-0.003785	0.008766	0.665874
rs4678803	A	G	0.283722	0.000123764	47.8559	0.0226117	0.00326862	4.6e-12	-0.000352	0.008437	0.966709
rs530287	C	T	0.518722	8.71994e-05	33.7163	-0.0172677	0.00297381	6.4e-09	-0.008399	0.007628	0.270805
rs6452980	G	A	0.923657	9.01162e-05	34.8442	0.0331761	0.00562029	3.6e-09	0.012256	0.016541	0.458746
rs7783012	A	G	0.591405	0.000114314	44.2017	0.0199641	0.00300282	3e-11	0.016838	0.007697	0.028718
SNP	EA	OA	Eaf	R2	FSTAT	Exposure			Migraine with aura
									GWAS from FinnGen
						Beta	Se	P-value	Beta	Se	P-value
rs10161414	C	T	0.31569	8.87975e-05	34.3343	-0.0186337	0.00318005	4.6e-09	-0.00904128	0.0158652	0.568757
rs12935426	G	A	0.362205	8.2221e-05	31.7912	-0.0172618	0.00306148	1.7e-08	-0.00789235	0.0159063	0.619769
rs247584	C	A	0.633091	8.06995e-05	31.2029	0.0170353	0.00304966	2.3e-08	-0.00623808	0.0155702	0.688684
rs4322261	A	G	0.836102	8.34288e-05	32.2583	-0.0226087	0.00398065	1.3e-08	0.0250638	0.0181725	0.167829
rs4638225	A	G	0.249277	0.000131201	50.7323	0.0243478	0.00341835	1.1e-12	-0.0186527	0.0175362	0.28748
rs4678803	A	G	0.283722	0.000123764	47.8559	0.0226117	0.00326862	4.6e-12	0.00755957	0.0180307	0.675025
rs530287	C	T	0.518722	8.71994e-05	33.7163	-0.0172677	0.00297381	6.4e-09	-0.00103147	0.0158321	0.948054
rs6452980	G	A	0.923657	9.01162e-05	34.8442	0.0331761	0.00562029	3.6e-09	-0.0626972	0.0351706	0.0746414
rs7783012	A	G	0.591405	0.000114314	44.2017	0.0199641	0.00300282	3e-11	0.0378337	0.0155552	0.0150065
SNP	EA	OA	Eaf	R2	FSTAT	Exposure			Migraine with aura
									GWAS from IHGC
						Beta	Se	P-value	Beta	Se	P-value
rs10161414	C	T	0.31569	8.87975e-05	34.3343	-0.0186337	0.00318005	4.6e-09	-0.011715	0.022235	0.59831
rs12935426	G	A	0.362205	8.2221e-05	31.7912	-0.0172618	0.00306148	1.7e-08	-0.022174	0.022421	0.322662
rs247584	C	A	0.633091	8.06995e-05	31.2029	0.0170353	0.00304966	2.3e-08	-0.020524	0.022141	0.353955
rs4322261	A	G	0.836102	8.34288e-05	32.2583	-0.0226087	0.00398065	1.3e-08	-0.026982	0.02733	0.323495
rs4638225	A	G	0.249277	0.000131201	50.7323	0.0243478	0.00341835	1.1e-12	-0.029313	0.024714	0.235558
rs4678803	A	G	0.283722	0.000123764	47.8559	0.0226117	0.00326862	4.6e-12	-0.033142	0.02386	0.164807
rs530287	C	T	0.518722	8.71994e-05	33.7163	-0.0172677	0.00297381	6.4e-09	-0.042009	0.021309	0.048689
rs6452980	G	A	0.923657	9.01162e-05	34.8442	0.0331761	0.00562029	3.6e-09	0.077058	0.053512	0.149852
rs7783012	A	G	0.591405	0.000114314	44.2017	0.0199641	0.00300282	3e-11	-0.003479	0.021705	0.872645
SNP	EA	OA	Eaf	R2	FSTAT	Exposure			Migraine with no aura
									GWAS from FinnGen
						Beta	Se	P-value	Beta	Se	P-value
rs10161414	C	T	0.31569	8.87975e-05	34.3343	-0.0186337	0.00318005	4.6e-09	-0.037058	0.017281	0.0319978
rs12935426	G	A	0.362205	8.2221e-05	31.7912	-0.0172618	0.00306148	1.7e-08	-0.0443836	0.0173186	0.0103841
rs247584	C	A	0.633091	8.06995e-05	31.2029	0.0170353	0.00304966	2.3e-08	0.00788454	0.0169607	0.642024
rs4322261	A	G	0.836102	8.34288e-05	32.2583	-0.0226087	0.00398065	1.3e-08	0.00625124	0.0197651	0.751793
rs4638225	A	G	0.249277	0.000131201	50.7323	0.0243478	0.00341835	1.1e-12	-0.0100058	0.0190626	0.59966
rs4678803	A	G	0.283722	0.000123764	47.8559	0.0226117	0.00326862	4.6e-12	0.0336489	0.0196245	0.0864112
rs530287	C	T	0.518722	8.71994e-05	33.7163	-0.0172677	0.00297381	6.4e-09	-0.0225466	0.0172183	0.190379
rs6452980	G	A	0.923657	9.01162e-05	34.8442	0.0331761	0.00562029	3.6e-09	-0.0149037	0.0381273	0.695876
rs7783012	A	G	0.591405	0.000114314	44.2017	0.0199641	0.00300282	3e-11	0.0188804	0.0169217	0.264528
SNP	EA	OA	Eaf	R2	FSTAT	Exposure			Migraine with no aura
									GWAS from IHGC
						Beta	Se	P-value	Beta	Se	P-value
rs10161414	C	T	0.31569	8.87975e-05	34.3343	-0.0186337	0.00318005	4.6e-09	-0.037369	0.02047	0.06793
rs12935426	G	A	0.362205	8.2221e-05	31.7912	-0.0172618	0.00306148	1.7e-08	-0.002747	0.020213	0.89187
rs247584	C	A	0.633091	8.06995e-05	31.2029	0.0170353	0.00304966	2.3e-08	-0.002135	0.019619	0.913306
rs4322261	A	G	0.836102	8.34288e-05	32.2583	-0.0226087	0.00398065	1.3e-08	-0.001768	0.02505	0.943717
rs4638225	A	G	0.249277	0.000131201	50.7323	0.0243478	0.00341835	1.1e-12	0.021434	0.021993	0.329763
rs4678803	A	G	0.283722	0.000123764	47.8559	0.0226117	0.00326862	4.6e-12	0.018139	0.020919	0.385882
rs530287	C	T	0.518722	8.71994e-05	33.7163	-0.0172677	0.00297381	6.4e-09	0.011496	0.019248	0.550364
rs6452980	G	A	0.923657	9.01162e-05	34.8442	0.0331761	0.00562029	3.6e-09	-0.043	0.045554	0.345194
rs7783012	A	G	0.591405	0.000114314	44.2017	0.0199641	0.00300282	3e-11	-0.004759	0.019096	0.803198

## Sheet: 3.2
Supplementary Table 3.2. Association of computer use instrumental variants with risk of migraine across 2 databases
SNP	EA	OA	Eaf	R2	FSTAT	Exposure			Overall migraine
									GWAS from FinnGen
						Beta	Se	P-value	Beta	Se	P-value
rs1037091	T	C	0.327191	0.000168769	60.9178	-0.0154792	0.00198324	5.9e-15	0.0251349	0.0108751	0.0208204
rs10828248	G	A	0.344788	8.54644e-05	30.8461	0.0106528	0.00191806	2.8e-08	0.0172699	0.0110177	0.117007
rs11259902	A	C	0.200416	8.837e-05	31.8949	0.0129081	0.0022856	1.6e-08	0.0105214	0.0132534	0.427272
rs112600282	G	A	0.110458	9.27645e-05	33.4812	-0.0169117	0.00292271	7.2e-09	0.0270859	0.0206892	0.190471
rs113851275	A	G	0.107713	0.000110807	39.9937	0.018611	0.00294288	2.5e-10	0.0173083	0.0160492	0.28083
rs11634155	C	T	0.335422	9.85114e-05	35.5556	-0.0116134	0.00194762	2.5e-09	-0.00239039	0.011736	0.838603
rs11652437	A	C	0.323689	0.000115734	41.7723	0.0127835	0.0019779	1e-10	0.0020326	0.011173	0.855645
rs11749912	G	A	0.574515	0.000133695	48.2559	-0.0128828	0.00185453	3.7e-12	0.0118726	0.0104983	0.258096
rs11766392	T	G	0.284846	0.000109673	39.5844	-0.0127364	0.00202434	3.1e-10	-0.00618403	0.0109573	0.572498
rs11942953	C	T	0.536706	8.95582e-05	32.3238	-0.010456	0.00183909	1.3e-08	0.00527629	0.0105889	0.618283
rs12128707	G	A	0.263894	9.28647e-05	33.5174	0.012036	0.00207896	7.1e-09	0.0177326	0.0117812	0.132283
rs12145677	A	G	0.297237	0.000168337	60.7618	0.0155784	0.00199851	6.4e-15	-0.016901	0.0110046	0.124583
rs1229984	C	T	0.97263	0.000107806	38.9105	-0.0344455	0.00552202	4.4e-10	-0.070948	0.0760789	0.351048
rs12521638	G	A	0.447056	8.32743e-05	30.0556	0.0100771	0.00183811	4.2e-08	-0.0122645	0.010823	0.257135
rs12706626	A	G	0.383718	8.52303e-05	30.7616	0.0104093	0.00187679	2.9e-08	0.0147658	0.0104603	0.158068
rs12820967	C	T	0.322363	0.000101284	36.5564	0.0118918	0.00196682	1.5e-09	0.00746471	0.0115015	0.516326
rs13262595	G	A	0.560611	0.000200491	72.3702	0.0156317	0.00183749	1.8e-17	0.0010682	0.0105453	0.919315
rs13422733	T	C	0.125533	8.34383e-05	30.1148	-0.0151513	0.00276095	4.1e-08	-0.0098274	0.0221471	0.657237
rs136553	T	C	0.376531	9.97258e-05	35.9939	0.0113107	0.00188527	2e-09	0.0112777	0.0103675	0.276688
rs1395020	A	G	0.302632	8.44098e-05	30.4655	-0.0109994	0.0019928	3.4e-08	0.00888811	0.0115015	0.439652
rs1448355	T	C	0.618488	0.000117091	42.2624	0.0122611	0.00188604	8e-11	-0.00178535	0.0113472	0.874978
rs1469249	A	G	0.210879	9.21975e-05	33.2765	-0.0129674	0.00224793	8e-09	0.0204744	0.0128299	0.110524
rs147543875	T	C	0.02267	8.86416e-05	31.993	-0.0363216	0.0064215	1.5e-08	-0.0853987	0.0678046	0.207856
rs1648906	A	G	0.321177	8.70768e-05	31.4281	-0.0110407	0.00196941	2.1e-08	0.00273533	0.0105448	0.795326
rs166835	T	C	0.556188	9.55339e-05	34.4808	-0.0108229	0.00184312	4.3e-09	-0.0144151	0.0104818	0.169052
rs16912540	G	A	0.136623	9.79767e-05	35.3626	-0.0158246	0.00266109	2.7e-09	-0.0205645	0.013297	0.121973
rs17167210	A	G	0.435554	0.000106132	38.3063	-0.0113974	0.00184149	6e-10	0.0113503	0.0103548	0.273022
rs17789218	C	T	0.245186	9.93867e-05	35.8715	0.0126948	0.00211958	2.1e-09	-0.00106224	0.012707	0.933379
rs17862355	G	T	0.442114	0.000103185	37.2426	-0.0112104	0.00183696	1e-09	-0.00673518	0.0103599	0.515617
rs1987942	C	T	0.616935	9.43306e-05	34.0465	-0.0110584	0.0018952	5.4e-09	-0.0173347	0.0106	0.101976
rs2032780	C	T	0.405991	0.00012017	43.3737	0.0123498	0.00187519	4.5e-11	-0.00114654	0.0104206	0.912388
rs206965	C	T	0.791153	9.22529e-05	33.2965	-0.0129444	0.00224327	7.9e-09	0.00372193	0.0128545	0.772165
rs246723	G	A	0.590096	9.00523e-05	32.5022	-0.0106669	0.00187103	1.2e-08	0.024251	0.0112062	0.0304593
rs2588543	T	C	0.67203	8.66846e-05	31.2866	0.0109083	0.00195019	2.2e-08	-0.00330268	0.0115127	0.77421
rs2748985	C	T	0.544439	0.000128684	46.447	0.012497	0.00183369	9.4e-12	0.016476	0.0103698	0.112094
rs2761438	G	A	0.623567	0.000100498	36.2726	-0.0113335	0.0018818	1.7e-09	0.00833191	0.0105437	0.429398
rs306755	C	T	0.47539	8.91552e-05	32.1783	0.0103722	0.00182847	1.4e-08	-0.0208527	0.0104873	0.0467692
rs34238696	G	A	0.106778	8.9404e-05	32.2682	-0.016816	0.00296029	1.3e-08	0.0208505	0.0158995	0.189725
rs4704043	T	C	0.713608	9.16393e-05	33.075	0.0116082	0.00201843	8.9e-09	0.0162561	0.0111507	0.144883
rs4852252	C	T	0.563856	8.51101e-05	30.7183	0.0101929	0.00183907	3e-08	-0.00193612	0.0103564	0.8517
rs56229818	C	T	0.484413	8.51018e-05	30.7153	-0.0101193	0.00182588	3e-08	-0.00284928	0.0104079	0.784267
rs58638214	T	C	0.397608	0.00013054	47.1171	-0.0128312	0.00186929	6.7e-12	-0.000311903	0.0103771	0.976022
rs6028090	A	G	0.55468	0.000127085	45.8698	0.0125335	0.00185058	1.3e-11	-0.0151337	0.0104715	0.148395
rs613872	T	G	0.826663	0.000117277	42.3293	-0.01571	0.00241465	7.7e-11	-0.0165231	0.0141372	0.242497
rs6449708	C	T	0.531571	9.22683e-05	33.302	-0.0105772	0.00183288	7.9e-09	-0.000596804	0.0103534	0.954033
rs6780848	G	T	0.269946	8.46204e-05	30.5415	0.0113678	0.00205698	3.3e-08	-0.00438559	0.0110931	0.692588
rs6935828	T	C	0.556131	8.49205e-05	30.6498	0.0101667	0.00183639	3.1e-08	-0.0176669	0.010384	0.0888771
rs7020477	G	A	0.266981	9.2949e-05	33.5478	-0.011973	0.00206714	7e-09	-0.00152811	0.0137751	0.91167
rs7209653	C	T	0.294886	0.000124042	44.7716	-0.013395	0.00200189	2.2e-11	0.00531571	0.0117225	0.650215
rs72828532	C	T	0.179279	0.000120152	43.3671	0.0156839	0.00238162	4.5e-11	-0.0264592	0.0145087	0.0682009
rs72847500	C	T	0.121024	8.76168e-05	31.6231	0.015805	0.00281055	1.9e-08	0.000254449	0.0168772	0.987971
rs7288455	G	A	0.566933	9.04527e-05	32.6467	-0.0105482	0.00184611	1.1e-08	0.00396309	0.0111409	0.722048
rs73578186	T	C	0.323945	0.000108786	39.2643	-0.0122916	0.00196159	3.7e-10	0.0191304	0.0104051	0.0659812
rs7526112	G	T	0.361752	9.04703e-05	32.6531	-0.0108478	0.00189836	1.1e-08	0.0153873	0.0107725	0.15318
rs75550998	T	G	0.053578	8.28237e-05	29.893	-0.0223915	0.00409541	4.6e-08	0.0175384	0.0318815	0.582243
rs7630869	T	C	0.304231	0.000183535	66.2487	0.0161134	0.00197969	4e-16	-0.0129708	0.0104618	0.215041
rs7904398	T	C	0.503287	8.62657e-05	31.1354	-0.0102001	0.001828	2.4e-08	-0.0145066	0.0105499	0.169116
rs7968738	A	G	0.263717	9.8797e-05	35.6587	-0.0124184	0.00207961	2.4e-09	0.0084361	0.0147551	0.567498
rs79720045	C	T	0.400744	0.000125313	45.2304	-0.0127624	0.00189765	1.8e-11	0.00977794	0.0104542	0.349629
rs806795	A	G	0.470383	8.92985e-05	32.2301	0.0103555	0.00182406	1.4e-08	-0.0177349	0.0105426	0.0925295
rs8102851	C	T	0.217206	9.24919e-05	33.3828	0.012967	0.00224428	7.6e-09	-0.00413162	0.0146287	0.777612
rs9375188	T	C	0.483548	0.000207486	74.8959	0.0158521	0.00183171	5e-18	0.00656526	0.0103484	0.525804
rs9537571	A	G	0.095569	0.000103122	37.2199	0.0189538	0.00310676	1.1e-09	0.0142281	0.0197656	0.471621
SNP	EA	OA	Eaf	R2	FSTAT	Exposure			Overall migraine
									GWAS from IHGC
						Beta	Se	P-value	Beta	Se	P-value
rs10208088	T	C	0.579637	8.50185e-05	30.6852	-0.0102417	0.00184887	3e-08	-0.00464	0.007707	0.547144
rs10518019	G	A	0.476252	8.23939e-05	29.7378	0.00994352	0.00182341	4.9e-08	-0.013286	0.007663	0.082948
rs11259902	A	C	0.200416	8.837e-05	31.8949	0.0129081	0.0022856	1.6e-08	0.003403	0.009398	0.71731
rs11634155	C	T	0.335422	9.85114e-05	35.5556	-0.0116134	0.00194762	2.5e-09	0.001788	0.008229	0.828003
rs11652437	A	C	0.323689	0.000115734	41.7723	0.0127835	0.0019779	1e-10	0.001729	0.010814	0.872979
rs11749912	G	A	0.574515	0.000133695	48.2559	-0.0128828	0.00185453	3.7e-12	-0.005396	0.007717	0.48443
rs11766392	T	G	0.284846	0.000109673	39.5844	-0.0127364	0.00202434	3.1e-10	-0.002921	0.008762	0.738851
rs12128707	G	A	0.263894	9.28647e-05	33.5174	0.012036	0.00207896	7.1e-09	0.006367	0.00898	0.478359
rs12145677	A	G	0.297237	0.000168337	60.7618	0.0155784	0.00199851	6.4e-15	-0.009042	0.008206	0.270523
rs1229984	C	T	0.97263	0.000107806	38.9105	-0.0344455	0.00552202	4.4e-10	-0.035252	0.026451	0.1826
rs12521638	G	A	0.447056	8.32743e-05	30.0556	0.0100771	0.00183811	4.2e-08	-0.004345	0.007772	0.5762
rs12820967	C	T	0.322363	0.000101284	36.5564	0.0118918	0.00196682	1.5e-09	0.004779	0.008767	0.585664
rs13422733	T	C	0.125533	8.34383e-05	30.1148	-0.0151513	0.00276095	4.1e-08	0.01358	0.012171	0.264485
rs136553	T	C	0.376531	9.97258e-05	35.9939	0.0113107	0.00188527	2e-09	-0.000253	0.007816	0.974181
rs1395020	A	G	0.302632	8.44098e-05	30.4655	-0.0109994	0.0019928	3.4e-08	0.003425	0.008318	0.680513
rs1448355	T	C	0.618488	0.000117091	42.2624	0.0122611	0.00188604	8e-11	0.000764	0.008118	0.925022
rs1469249	A	G	0.210879	9.21975e-05	33.2765	-0.0129674	0.00224793	8e-09	-0.012849	0.009387	0.171012
rs147543875	T	C	0.02267	8.86416e-05	31.993	-0.0363216	0.0064215	1.5e-08	-0.026667	0.048433	0.581934
rs1648906	A	G	0.321177	8.70768e-05	31.4281	-0.0110407	0.00196941	2.1e-08	0.005199	0.008045	0.518153
rs166835	T	C	0.556188	9.55339e-05	34.4808	-0.0108229	0.00184312	4.3e-09	-0.000126	0.007617	0.986848
rs16912540	G	A	0.136623	9.79767e-05	35.3626	-0.0158246	0.00266109	2.7e-09	-0.001006	0.010997	0.927122
rs17167210	A	G	0.435554	0.000106132	38.3063	-0.0113974	0.00184149	6e-10	-0.014419	0.00769	0.060815
rs17789218	C	T	0.245186	9.93867e-05	35.8715	0.0126948	0.00211958	2.1e-09	-0.016887	0.009536	0.076577
rs17862355	G	T	0.442114	0.000103185	37.2426	-0.0112104	0.00183696	1e-09	-0.004985	0.007641	0.514127
rs2032780	C	T	0.405991	0.00012017	43.3737	0.0123498	0.00187519	4.5e-11	-0.00476	0.00782	0.542761
rs2041687	G	T	0.549172	0.000108691	39.2302	0.0117094	0.00186949	3.8e-10	0.014445	0.007795	0.063889
rs2068625	C	T	0.698468	0.000140674	50.7755	0.0141749	0.00198926	1e-12	-0.003639	0.008327	0.662093
rs206965	C	T	0.791153	9.22529e-05	33.2965	-0.0129444	0.00224327	7.9e-09	0.001663	0.009575	0.862097
rs246723	G	A	0.590096	9.00523e-05	32.5022	-0.0106669	0.00187103	1.2e-08	-0.005047	0.007792	0.517202
rs2588543	T	C	0.67203	8.66846e-05	31.2866	0.0109083	0.00195019	2.2e-08	0.00341	0.008113	0.674311
rs2734833	A	G	0.606682	0.000121144	43.7254	0.0123753	0.00187149	3.8e-11	-0.004394	0.007724	0.569438
rs2748985	C	T	0.544439	0.000128684	46.447	0.012497	0.00183369	9.4e-12	0.009921	0.007901	0.209225
rs2761438	G	A	0.623567	0.000100498	36.2726	-0.0113335	0.0018818	1.7e-09	0.014148	0.007929	0.074376
rs28710456	C	T	0.49014	8.9841e-05	32.4259	-0.0104057	0.00182736	1.2e-08	0.013258	0.007583	0.080387
rs306755	C	T	0.47539	8.91552e-05	32.1783	0.0103722	0.00182847	1.4e-08	-0.00794	0.007646	0.299057
rs34238696	G	A	0.106778	8.9404e-05	32.2682	-0.016816	0.00296029	1.3e-08	0.014405	0.012378	0.244503
rs4704043	T	C	0.713608	9.16393e-05	33.075	0.0116082	0.00201843	8.9e-09	-0.00473	0.00834	0.570686
rs4852252	C	T	0.563856	8.51101e-05	30.7183	0.0101929	0.00183907	3e-08	0.009135	0.007708	0.235977
rs56229818	C	T	0.484413	8.51018e-05	30.7153	-0.0101193	0.00182588	3e-08	-0.002761	0.007617	0.717023
rs58638214	T	C	0.397608	0.00013054	47.1171	-0.0128312	0.00186929	6.7e-12	-0.007359	0.007848	0.348385
rs6028090	A	G	0.55468	0.000127085	45.8698	0.0125335	0.00185058	1.3e-11	0.00303	0.008022	0.70569
rs613872	T	G	0.826663	0.000117277	42.3293	-0.01571	0.00241465	7.7e-11	-0.008844	0.010129	0.382601
rs6449708	C	T	0.531571	9.22683e-05	33.302	-0.0105772	0.00183288	7.9e-09	0.004808	0.007601	0.527008
rs6780848	G	T	0.269946	8.46204e-05	30.5415	0.0113678	0.00205698	3.3e-08	-0.007401	0.008537	0.385958
rs6935828	T	C	0.556131	8.49205e-05	30.6498	0.0101667	0.00183639	3.1e-08	0.006844	0.007632	0.369898
rs7020477	G	A	0.266981	9.2949e-05	33.5478	-0.011973	0.00206714	7e-09	0.00537	0.008923	0.547347
rs7209653	C	T	0.294886	0.000124042	44.7716	-0.013395	0.00200189	2.2e-11	0.013039	0.008312	0.116704
rs7281293	C	A	0.247862	9.74962e-05	35.1891	0.0126268	0.00212857	3e-09	0.001442	0.008906	0.871331
rs72847500	C	T	0.121024	8.76168e-05	31.6231	0.015805	0.00281055	1.9e-08	0.006361	0.011729	0.587635
rs7288455	G	A	0.566933	9.04527e-05	32.6467	-0.0105482	0.00184611	1.1e-08	-0.003048	0.007829	0.69707
rs7335281	G	A	0.779306	9.79684e-05	35.3596	-0.0131066	0.00220412	2.7e-09	-0.007331	0.009311	0.431097
rs75550998	T	G	0.053578	8.28237e-05	29.893	-0.0223915	0.00409541	4.6e-08	-0.022787	0.019174	0.234643
rs7564844	A	G	0.700653	0.000106537	38.4526	-0.0123434	0.00199054	5.6e-10	0.007627	0.008313	0.358878
rs7630869	T	C	0.304231	0.000183535	66.2487	0.0161134	0.00197969	4e-16	0.012924	0.008159	0.1132
rs76824303	C	A	0.099986	0.000118833	42.8911	-0.0204431	0.00312149	5.8e-11	0.016131	0.013021	0.215367
rs7904398	T	C	0.503287	8.62657e-05	31.1354	-0.0102001	0.001828	2.4e-08	-0.002603	0.007587	0.731489
rs7968738	A	G	0.263717	9.8797e-05	35.6587	-0.0124184	0.00207961	2.4e-09	0.008895	0.008883	0.316649
rs79720045	C	T	0.400744	0.000125313	45.2304	-0.0127624	0.00189765	1.8e-11	0.002721	0.008485	0.748431
rs806795	A	G	0.470383	8.92985e-05	32.2301	0.0103555	0.00182406	1.4e-08	-0.006083	0.007611	0.424156
rs8102851	C	T	0.217206	9.24919e-05	33.3828	0.012967	0.00224428	7.6e-09	-0.00127	0.009993	0.898876
SNP	EA	OA	Eaf	R2	FSTAT	Exposure			Migraine with aura
									GWAS from FinnGen
						Beta	Se	P-value	Beta	Se	P-value
rs1037091	T	C	0.327191	0.000168769	60.9178	-0.0154792	0.00198324	5.9e-15	-0.00492137	0.761356	0.0162047
rs10518019	G	A	0.476252	8.23939e-05	29.7378	0.00994352	0.00182341	4.9e-08	-0.0069799	0.658572	0.0157957
rs10828248	G	A	0.344788	8.54644e-05	30.8461	0.0106528	0.00191806	2.8e-08	0.00340545	0.835537	0.0164034
rs11259902	A	C	0.200416	8.837e-05	31.8949	0.0129081	0.0022856	1.6e-08	0.000796718	0.967771	0.019719
rs112600282	G	A	0.110458	9.27645e-05	33.4812	-0.0169117	0.00292271	7.2e-09	0.0583372	0.0592216	0.0309227
rs113851275	A	G	0.107713	0.000110807	39.9937	0.018611	0.00294288	2.5e-10	0.0166677	0.486755	0.0239658
rs11634155	C	T	0.335422	9.85114e-05	35.5556	-0.0116134	0.00194762	2.5e-09	-0.0259661	0.137132	0.0174673
rs11652437	A	C	0.323689	0.000115734	41.7723	0.0127835	0.0019779	1e-10	0.0145721	0.381075	0.0166364
rs11749912	G	A	0.574515	0.000133695	48.2559	-0.0128828	0.00185453	3.7e-12	0.0117913	0.45094	0.0156415
rs11766392	T	G	0.284846	0.000109673	39.5844	-0.0127364	0.00202434	3.1e-10	0.0155246	0.341354	0.0163161
rs11942953	C	T	0.536706	8.95582e-05	32.3238	-0.010456	0.00183909	1.3e-08	0.00418819	0.790744	0.0157839
rs12128707	G	A	0.263894	9.28647e-05	33.5174	0.012036	0.00207896	7.1e-09	0.039174	0.0253046	0.0175141
rs12145677	A	G	0.297237	0.000168337	60.7618	0.0155784	0.00199851	6.4e-15	-0.0291701	0.074535	0.0163573
rs1229984	C	T	0.97263	0.000107806	38.9105	-0.0344455	0.00552202	4.4e-10	0.0592286	0.603145	0.113927
rs12521638	G	A	0.447056	8.32743e-05	30.0556	0.0100771	0.00183811	4.2e-08	0.00179047	0.911519	0.0161126
rs12706626	A	G	0.383718	8.52303e-05	30.7616	0.0104093	0.00187679	2.9e-08	0.0200265	0.198567	0.015577
rs12820967	C	T	0.322363	0.000101284	36.5564	0.0118918	0.00196682	1.5e-09	0.00131208	0.938958	0.0171335
rs13262595	G	A	0.560611	0.000200491	72.3702	0.0156317	0.00183749	1.8e-17	0.0131702	0.401358	0.0156938
rs13422733	T	C	0.125533	8.34383e-05	30.1148	-0.0151513	0.00276095	4.1e-08	-0.0163761	0.620587	0.0330819
rs136553	T	C	0.376531	9.97258e-05	35.9939	0.0113107	0.00188527	2e-09	0.0332611	0.03112	0.0154305
rs1395020	A	G	0.302632	8.44098e-05	30.4655	-0.0109994	0.0019928	3.4e-08	-0.00571688	0.738554	0.0171282
rs1448355	T	C	0.618488	0.000117091	42.2624	0.0122611	0.00188604	8e-11	0.00483398	0.774824	0.0168978
rs1469249	A	G	0.210879	9.21975e-05	33.2765	-0.0129674	0.00224793	8e-09	-0.000403046	0.983169	0.0191051
rs147543875	T	C	0.02267	8.86416e-05	31.993	-0.0363216	0.0064215	1.5e-08	-0.0281619	0.78043	0.101026
rs1648906	A	G	0.321177	8.70768e-05	31.4281	-0.0110407	0.00196941	2.1e-08	0.0027347	0.861729	0.015701
rs166835	T	C	0.556188	9.55339e-05	34.4808	-0.0108229	0.00184312	4.3e-09	-0.0268145	0.0857334	0.0156048
rs16912540	G	A	0.136623	9.79767e-05	35.3626	-0.0158246	0.00266109	2.7e-09	0.000448711	0.98192	0.0198002
rs17167210	A	G	0.435554	0.000106132	38.3063	-0.0113974	0.00184149	6e-10	0.00306503	0.842278	0.0154037
rs17789218	C	T	0.245186	9.93867e-05	35.8715	0.0126948	0.00211958	2.1e-09	0.0232858	0.218147	0.0189089
rs17862355	G	T	0.442114	0.000103185	37.2426	-0.0112104	0.00183696	1e-09	-0.0179966	0.243125	0.0154185
rs1987942	C	T	0.616935	9.43306e-05	34.0465	-0.0110584	0.0018952	5.4e-09	-0.0195552	0.215403	0.0157851
rs2032780	C	T	0.405991	0.00012017	43.3737	0.0123498	0.00187519	4.5e-11	-0.0146498	0.345261	0.0155218
rs2041687	G	T	0.549172	0.000108691	39.2302	0.0117094	0.00186949	3.8e-10	0.027162	0.0953411	0.0162854
rs2068625	C	T	0.698468	0.000140674	50.7755	0.0141749	0.00198926	1e-12	-0.0275827	0.120688	0.0177736
rs206965	C	T	0.791153	9.22529e-05	33.2965	-0.0129444	0.00224327	7.9e-09	-0.00278403	0.884292	0.0191303
rs2120461	T	C	0.661091	0.000110831	40.0024	0.0121844	0.00192646	2.5e-10	0.0161889	0.310491	0.0159624
rs246723	G	A	0.590096	9.00523e-05	32.5022	-0.0106669	0.00187103	1.2e-08	0.0118426	0.477977	0.0166901
rs2588543	T	C	0.67203	8.66846e-05	31.2866	0.0109083	0.00195019	2.2e-08	-0.0133758	0.434843	0.017128
rs2748985	C	T	0.544439	0.000128684	46.447	0.012497	0.00183369	9.4e-12	0.030988	0.0447744	0.0154417
rs2761438	G	A	0.623567	0.000100498	36.2726	-0.0113335	0.0018818	1.7e-09	0.0191878	0.221361	0.0156901
rs306755	C	T	0.47539	8.91552e-05	32.1783	0.0103722	0.00182847	1.4e-08	-0.017476	0.263308	0.015623
rs34238696	G	A	0.106778	8.9404e-05	32.2682	-0.016816	0.00296029	1.3e-08	-0.00990019	0.675962	0.0236857
rs3730399	G	A	0.064399	0.000103918	37.5071	-0.0227905	0.00372131	9.1e-10	0.0624455	0.0120856	0.0248823
rs4704043	T	C	0.713608	9.16393e-05	33.075	0.0116082	0.00201843	8.9e-09	0.0231607	0.163134	0.0166073
rs4852252	C	T	0.563856	8.51101e-05	30.7183	0.0101929	0.00183907	3e-08	-0.000971689	0.949746	0.0154175
rs56229818	C	T	0.484413	8.51018e-05	30.7153	-0.0101193	0.00182588	3e-08	-0.0286376	0.064619	0.0154975
rs58638214	T	C	0.397608	0.00013054	47.1171	-0.0128312	0.00186929	6.7e-12	-0.00978877	0.526216	0.0154447
rs6028090	A	G	0.55468	0.000127085	45.8698	0.0125335	0.00185058	1.3e-11	-0.00763316	0.624519	0.0155952
rs613872	T	G	0.826663	0.000117277	42.3293	-0.01571	0.00241465	7.7e-11	-0.0339493	0.106728	0.0210463
rs6449708	C	T	0.531571	9.22683e-05	33.302	-0.0105772	0.00183288	7.9e-09	-0.0166835	0.27883	0.0154055
rs6780848	G	T	0.269946	8.46204e-05	30.5415	0.0113678	0.00205698	3.3e-08	0.010871	0.509839	0.016494
rs6935828	T	C	0.556131	8.49205e-05	30.6498	0.0101667	0.00183639	3.1e-08	-0.0213026	0.168548	0.0154716
rs7020477	G	A	0.266981	9.2949e-05	33.5478	-0.011973	0.00206714	7e-09	0.0211093	0.303158	0.0205008
rs707926	A	G	0.150465	9.01667e-05	32.5435	0.0145369	0.00254823	1.2e-08	-0.036597	0.0250063	0.0163284
rs7209653	C	T	0.294886	0.000124042	44.7716	-0.013395	0.00200189	2.2e-11	0.00732151	0.674865	0.0174538
rs72828532	C	T	0.179279	0.000120152	43.3671	0.0156839	0.00238162	4.5e-11	-0.00915871	0.671382	0.0215879
rs72847500	C	T	0.121024	8.76168e-05	31.6231	0.015805	0.00281055	1.9e-08	0.00993668	0.692499	0.0251264
rs7288455	G	A	0.566933	9.04527e-05	32.6467	-0.0105482	0.00184611	1.1e-08	0.00925093	0.576828	0.016578
rs7335281	G	A	0.779306	9.79684e-05	35.3596	-0.0131066	0.00220412	2.7e-09	-0.01469	0.458033	0.0197954
rs73578186	T	C	0.323945	0.000108786	39.2643	-0.0122916	0.00196159	3.7e-10	0.0227744	0.141484	0.0154898
rs7526112	G	T	0.361752	9.04703e-05	32.6531	-0.0108478	0.00189836	1.1e-08	0.0103272	0.519193	0.0160213
rs75550998	T	G	0.053578	8.28237e-05	29.893	-0.0223915	0.00409541	4.6e-08	-0.0226072	0.636917	0.0478953
rs7630869	T	C	0.304231	0.000183535	66.2487	0.0161134	0.00197969	4e-16	-6.91e-05	0.996457	0.0155667
rs7904398	T	C	0.503287	8.62657e-05	31.1354	-0.0102001	0.001828	2.4e-08	-0.0316202	0.0439866	0.0156985
rs7968738	A	G	0.263717	9.8797e-05	35.6587	-0.0124184	0.00207961	2.4e-09	0.0269661	0.220315	0.0220008
rs79720045	C	T	0.400744	0.000125313	45.2304	-0.0127624	0.00189765	1.8e-11	-0.00758706	0.626284	0.0155803
rs806795	A	G	0.470383	8.92985e-05	32.2301	0.0103555	0.00182406	1.4e-08	-0.0249772	0.111846	0.0157094
rs8102851	C	T	0.217206	9.24919e-05	33.3828	0.012967	0.00224428	7.6e-09	0.00021587	0.992107	0.021822
rs9375188	T	C	0.483548	0.000207486	74.8959	0.0158521	0.00183171	5e-18	0.00180636	0.906668	0.015407
rs9537571	A	G	0.095569	0.000103122	37.2199	0.0189538	0.00310676	1.1e-09	-0.00108145	0.970774	0.0295175
SNP	EA	OA	Eaf	R2	FSTAT	Exposure			Migraine with aura
									GWAS from IHGC
						Beta	Se	P-value	Beta	Se	P-value
rs10208088	T	C	0.579637	8.50185e-05	30.6852	-0.0102417	0.00184887	3e-08	-0.01434	0.021443	0.50369
rs1037091	T	C	0.327191	0.000168769	60.9178	-0.0154792	0.00198324	5.9e-15	0.010575	0.022313	0.635568
rs10518019	G	A	0.476252	8.23939e-05	29.7378	0.00994352	0.00182341	4.9e-08	-0.01933	0.021637	0.371664
rs10828248	G	A	0.344788	8.54644e-05	30.8461	0.0106528	0.00191806	2.8e-08	0.021902	0.022758	0.335853
rs11259902	A	C	0.200416	8.837e-05	31.8949	0.0129081	0.0022856	1.6e-08	-0.047083	0.026024	0.070429
rs112600282	G	A	0.110458	9.27645e-05	33.4812	-0.0169117	0.00292271	7.2e-09	-0.036381	0.035224	0.301658
rs113851275	A	G	0.107713	0.000110807	39.9937	0.018611	0.00294288	2.5e-10	0.047301	0.036716	0.197625
rs11634155	C	T	0.335422	9.85114e-05	35.5556	-0.0116134	0.00194762	2.5e-09	-0.014863	0.022748	0.513513
rs11652437	A	C	0.323689	0.000115734	41.7723	0.0127835	0.0019779	1e-10	0.000556	0.046593	0.990472
rs11749912	G	A	0.574515	0.000133695	48.2559	-0.0128828	0.00185453	3.7e-12	0.023383	0.02182	0.283866
rs11766392	T	G	0.284846	0.000109673	39.5844	-0.0127364	0.00202434	3.1e-10	-0.025296	0.024974	0.311094
rs11942953	C	T	0.536706	8.95582e-05	32.3238	-0.010456	0.00183909	1.3e-08	0.00851	0.021541	0.692827
rs12128707	G	A	0.263894	9.28647e-05	33.5174	0.012036	0.00207896	7.1e-09	0.030081	0.024483	0.219189
rs12145677	A	G	0.297237	0.000168337	60.7618	0.0155784	0.00199851	6.4e-15	0.000866	0.022553	0.96936
rs1229984	C	T	0.97263	0.000107806	38.9105	-0.0344455	0.00552202	4.4e-10	-0.022267	0.069125	0.74736
rs12521638	G	A	0.447056	8.32743e-05	30.0556	0.0100771	0.00183811	4.2e-08	-0.03778	0.022382	0.091424
rs12706626	A	G	0.383718	8.52303e-05	30.7616	0.0104093	0.00187679	2.9e-08	-0.012488	0.023114	0.589031
rs12820967	C	T	0.322363	0.000101284	36.5564	0.0118918	0.00196682	1.5e-09	0.001042	0.026861	0.969049
rs13262595	G	A	0.560611	0.000200491	72.3702	0.0156317	0.00183749	1.8e-17	0.022189	0.023444	0.343902
rs13422733	T	C	0.125533	8.34383e-05	30.1148	-0.0151513	0.00276095	4.1e-08	0.011069	0.035351	0.754207
rs136553	T	C	0.376531	9.97258e-05	35.9939	0.0113107	0.00188527	2e-09	-0.027591	0.021771	0.205016
rs1395020	A	G	0.302632	8.44098e-05	30.4655	-0.0109994	0.0019928	3.4e-08	0.057786	0.023615	0.014423
rs1448355	T	C	0.618488	0.000117091	42.2624	0.0122611	0.00188604	8e-11	0.005458	0.02428	0.822139
rs1469249	A	G	0.210879	9.21975e-05	33.2765	-0.0129674	0.00224793	8e-09	-0.006079	0.026478	0.818409
rs1648906	A	G	0.321177	8.70768e-05	31.4281	-0.0110407	0.00196941	2.1e-08	0.001861	0.021953	0.932425
rs166835	T	C	0.556188	9.55339e-05	34.4808	-0.0108229	0.00184312	4.3e-09	-0.015232	0.021817	0.485087
rs16912540	G	A	0.136623	9.79767e-05	35.3626	-0.0158246	0.00266109	2.7e-09	0.021806	0.030301	0.471751
rs17167210	A	G	0.435554	0.000106132	38.3063	-0.0113974	0.00184149	6e-10	0.016658	0.021786	0.444512
rs17789218	C	T	0.245186	9.93867e-05	35.8715	0.0126948	0.00211958	2.1e-09	-0.036716	0.027267	0.17812
rs17862355	G	T	0.442114	0.000103185	37.2426	-0.0112104	0.00183696	1e-09	-0.000949	0.021696	0.965105
rs1987942	C	T	0.616935	9.43306e-05	34.0465	-0.0110584	0.0018952	5.4e-09	-0.055744	0.021528	0.009633
rs2032780	C	T	0.405991	0.00012017	43.3737	0.0123498	0.00187519	4.5e-11	-0.010519	0.021838	0.630064
rs2041687	G	T	0.549172	0.000108691	39.2302	0.0117094	0.00186949	3.8e-10	0.036653	0.02154	0.088835
rs2068625	C	T	0.698468	0.000140674	50.7755	0.0141749	0.00198926	1e-12	0.004324	0.0236	0.854607
rs206965	C	T	0.791153	9.22529e-05	33.2965	-0.0129444	0.00224327	7.9e-09	-0.034713	0.026485	0.189963
rs2120461	T	C	0.661091	0.000110831	40.0024	0.0121844	0.00192646	2.5e-10	0.010785	0.02255	0.632465
rs246723	G	A	0.590096	9.00523e-05	32.5022	-0.0106669	0.00187103	1.2e-08	0.002679	0.022145	0.903703
rs2588543	T	C	0.67203	8.66846e-05	31.2866	0.0109083	0.00195019	2.2e-08	-0.002284	0.022964	0.920758
rs2734833	A	G	0.606682	0.000121144	43.7254	0.0123753	0.00187149	3.8e-11	-0.030272	0.021289	0.155026
rs2748985	C	T	0.544439	0.000128684	46.447	0.012497	0.00183369	9.4e-12	0.02525	0.022906	0.270297
rs2761438	G	A	0.623567	0.000100498	36.2726	-0.0113335	0.0018818	1.7e-09	-0.020773	0.021981	0.344619
rs28710456	C	T	0.49014	8.9841e-05	32.4259	-0.0104057	0.00182736	1.2e-08	0.024017	0.021585	0.265836
rs306755	C	T	0.47539	8.91552e-05	32.1783	0.0103722	0.00182847	1.4e-08	-0.042936	0.021311	0.043944
rs34238696	G	A	0.106778	8.9404e-05	32.2682	-0.016816	0.00296029	1.3e-08	0.01327	0.035791	0.710822
rs3730399	G	A	0.064399	0.000103918	37.5071	-0.0227905	0.00372131	9.1e-10	0.048567	0.040052	0.225267
rs4704043	T	C	0.713608	9.16393e-05	33.075	0.0116082	0.00201843	8.9e-09	0.01289	0.024061	0.59218
rs4852252	C	T	0.563856	8.51101e-05	30.7183	0.0101929	0.00183907	3e-08	0.036596	0.021529	0.089158
rs56229818	C	T	0.484413	8.51018e-05	30.7153	-0.0101193	0.00182588	3e-08	0.00055	0.021197	0.979278
rs58638214	T	C	0.397608	0.00013054	47.1171	-0.0128312	0.00186929	6.7e-12	-0.021821	0.021938	0.31988
rs6028090	A	G	0.55468	0.000127085	45.8698	0.0125335	0.00185058	1.3e-11	0.027701	0.024036	0.249112
rs613872	T	G	0.826663	0.000117277	42.3293	-0.01571	0.00241465	7.7e-11	-0.018498	0.027928	0.507774
rs6449708	C	T	0.531571	9.22683e-05	33.302	-0.0105772	0.00183288	7.9e-09	-0.022359	0.021335	0.294619
rs6780848	G	T	0.269946	8.46204e-05	30.5415	0.0113678	0.00205698	3.3e-08	0.001643	0.024367	0.946216
rs6935828	T	C	0.556131	8.49205e-05	30.6498	0.0101667	0.00183639	3.1e-08	-0.011774	0.021228	0.579148
rs7020477	G	A	0.266981	9.2949e-05	33.5478	-0.011973	0.00206714	7e-09	0.024557	0.025481	0.335175
rs7209653	C	T	0.294886	0.000124042	44.7716	-0.013395	0.00200189	2.2e-11	0.03798	0.023211	0.101771
rs7281293	C	A	0.247862	9.74962e-05	35.1891	0.0126268	0.00212857	3e-09	0.058379	0.024216	0.015939
rs72828532	C	T	0.179279	0.000120152	43.3671	0.0156839	0.00238162	4.5e-11	-0.046263	0.027951	0.097893
rs72847500	C	T	0.121024	8.76168e-05	31.6231	0.015805	0.00281055	1.9e-08	0.044268	0.032262	0.169999
rs7288455	G	A	0.566933	9.04527e-05	32.6467	-0.0105482	0.00184611	1.1e-08	0.029749	0.02205	0.177264
rs7335281	G	A	0.779306	9.79684e-05	35.3596	-0.0131066	0.00220412	2.7e-09	-0.01764	0.025569	0.49028
rs73578186	T	C	0.323945	0.000108786	39.2643	-0.0122916	0.00196159	3.7e-10	-0.034359	0.022399	0.125037
rs7526112	G	T	0.361752	9.04703e-05	32.6531	-0.0108478	0.00189836	1.1e-08	0.015621	0.022233	0.48232
rs75550998	T	G	0.053578	8.28237e-05	29.893	-0.0223915	0.00409541	4.6e-08	0.050424	0.064321	0.433083
rs7564844	A	G	0.700653	0.000106537	38.4526	-0.0123434	0.00199054	5.6e-10	0.015507	0.023125	0.502489
rs7630869	T	C	0.304231	0.000183535	66.2487	0.0161134	0.00197969	4e-16	0.038555	0.022832	0.091294
rs76824303	C	A	0.099986	0.000118833	42.8911	-0.0204431	0.00312149	5.8e-11	-0.000995	0.035585	0.977681
rs7904398	T	C	0.503287	8.62657e-05	31.1354	-0.0102001	0.001828	2.4e-08	0.010595	0.021495	0.622109
rs7968738	A	G	0.263717	9.8797e-05	35.6587	-0.0124184	0.00207961	2.4e-09	-0.011691	0.024826	0.63773
rs79720045	C	T	0.400744	0.000125313	45.2304	-0.0127624	0.00189765	1.8e-11	0.043256	0.025883	0.094672
rs806795	A	G	0.470383	8.92985e-05	32.2301	0.0103555	0.00182406	1.4e-08	-0.039477	0.02124	0.063095
rs8102851	C	T	0.217206	9.24919e-05	33.3828	0.012967	0.00224428	7.6e-09	0.028163	0.026791	0.293137
rs9375188	T	C	0.483548	0.000207486	74.8959	0.0158521	0.00183171	5e-18	-0.014129	0.020813	0.497262
rs9537571	A	G	0.095569	0.000103122	37.2199	0.0189538	0.00310676	1.1e-09	0.064712	0.037743	0.086432
SNP	EA	OA	Eaf	R2	FSTAT	Exposure			Migraine with no aura
									GWAS from FinnGen
						Beta	Se	P-value	Beta	Se	P-value
rs1037091	T	C	0.327191	0.000168769	60.9178	-0.0154792	0.00198324	5.9e-15	0.0318298	0.0175994	0.0705164
rs10518019	G	A	0.476252	8.23939e-05	29.7378	0.00994352	0.00182341	4.9e-08	-0.0144266	0.0171856	0.401212
rs11259902	A	C	0.200416	8.837e-05	31.8949	0.0129081	0.0022856	1.6e-08	0.0184033	0.0214465	0.390838
rs112600282	G	A	0.110458	9.27645e-05	33.4812	-0.0169117	0.00292271	7.2e-09	0.00434599	0.0335286	0.896867
rs113851275	A	G	0.107713	0.000110807	39.9937	0.018611	0.00294288	2.5e-10	0.0179312	0.026049	0.491223
rs11634155	C	T	0.335422	9.85114e-05	35.5556	-0.0116134	0.00194762	2.5e-09	0.0152755	0.0190216	0.421937
rs11652437	A	C	0.323689	0.000115734	41.7723	0.0127835	0.0019779	1e-10	-0.00461078	0.0180721	0.79862
rs11749912	G	A	0.574515	0.000133695	48.2559	-0.0128828	0.00185453	3.7e-12	0.00996412	0.0170184	0.558217
rs11766392	T	G	0.284846	0.000109673	39.5844	-0.0127364	0.00202434	3.1e-10	-0.0270382	0.0177822	0.128379
rs11942953	C	T	0.536706	8.95582e-05	32.3238	-0.010456	0.00183909	1.3e-08	-0.00913448	0.0171551	0.594404
rs12128707	G	A	0.263894	9.28647e-05	33.5174	0.012036	0.00207896	7.1e-09	0.0161894	0.0190835	0.396247
rs12145677	A	G	0.297237	0.000168337	60.7618	0.0155784	0.00199851	6.4e-15	-0.0234021	0.0178138	0.188945
rs12521638	G	A	0.447056	8.32743e-05	30.0556	0.0100771	0.00183811	4.2e-08	-0.00533134	0.0175404	0.761169
rs12706626	A	G	0.383718	8.52303e-05	30.7616	0.0104093	0.00187679	2.9e-08	0.0208628	0.0169443	0.218228
rs12820967	C	T	0.322363	0.000101284	36.5564	0.0118918	0.00196682	1.5e-09	0.0127193	0.0186512	0.495268
rs13262595	G	A	0.560611	0.000200491	72.3702	0.0156317	0.00183749	1.8e-17	-0.00658191	0.0170934	0.700197
rs13422733	T	C	0.125533	8.34383e-05	30.1148	-0.0151513	0.00276095	4.1e-08	-0.0218786	0.0359524	0.542828
rs136553	T	C	0.376531	9.97258e-05	35.9939	0.0113107	0.00188527	2e-09	0.00439734	0.0167892	0.793387
rs1395020	A	G	0.302632	8.44098e-05	30.4655	-0.0109994	0.0019928	3.4e-08	0.0305221	0.0186276	0.10131
rs1448355	T	C	0.618488	0.000117091	42.2624	0.0122611	0.00188604	8e-11	-0.00856828	0.0183541	0.640621
rs1469249	A	G	0.210879	9.21975e-05	33.2765	-0.0129674	0.00224793	8e-09	0.0183116	0.0207426	0.377342
rs1648906	A	G	0.321177	8.70768e-05	31.4281	-0.0110407	0.00196941	2.1e-08	-0.0242682	0.0170641	0.154974
rs166835	T	C	0.556188	9.55339e-05	34.4808	-0.0108229	0.00184312	4.3e-09	-0.0164538	0.0169806	0.332559
rs16912540	G	A	0.136623	9.79767e-05	35.3626	-0.0158246	0.00266109	2.7e-09	-0.00857727	0.0215312	0.690361
rs17167210	A	G	0.435554	0.000106132	38.3063	-0.0113974	0.00184149	6e-10	0.0343917	0.0167706	0.040294
rs17789218	C	T	0.245186	9.93867e-05	35.8715	0.0126948	0.00211958	2.1e-09	-0.0287839	0.0205672	0.161661
rs17862355	G	T	0.442114	0.000103185	37.2426	-0.0112104	0.00183696	1e-09	-0.00502101	0.0167861	0.764851
rs2032780	C	T	0.405991	0.00012017	43.3737	0.0123498	0.00187519	4.5e-11	-0.00995382	0.0168842	0.555504
rs2041687	G	T	0.549172	0.000108691	39.2302	0.0117094	0.00186949	3.8e-10	-0.00311781	0.0177101	0.860257
rs2068625	C	T	0.698468	0.000140674	50.7755	0.0141749	0.00198926	1e-12	-0.0364741	0.019358	0.0595402
rs206965	C	T	0.791153	9.22529e-05	33.2965	-0.0129444	0.00224327	7.9e-09	0.00836074	0.0208165	0.68795
rs2120461	T	C	0.661091	0.000110831	40.0024	0.0121844	0.00192646	2.5e-10	0.0240205	0.0173764	0.166861
rs246723	G	A	0.590096	9.00523e-05	32.5022	-0.0106669	0.00187103	1.2e-08	0.00933042	0.0181287	0.606778
rs2588543	T	C	0.67203	8.66846e-05	31.2866	0.0109083	0.00195019	2.2e-08	-0.0191817	0.018635	0.303321
rs2734833	A	G	0.606682	0.000121144	43.7254	0.0123753	0.00187149	3.8e-11	-0.0269424	0.016799	0.108757
rs2748985	C	T	0.544439	0.000128684	46.447	0.012497	0.00183369	9.4e-12	-0.00533045	0.0167919	0.750908
rs2761438	G	A	0.623567	0.000100498	36.2726	-0.0113335	0.0018818	1.7e-09	0.00307915	0.0170742	0.856886
rs28710456	C	T	0.49014	8.9841e-05	32.4259	-0.0104057	0.00182736	1.2e-08	0.0235766	0.0167661	0.159663
rs306755	C	T	0.47539	8.91552e-05	32.1783	0.0103722	0.00182847	1.4e-08	-0.0265168	0.0169975	0.118751
rs34238696	G	A	0.106778	8.9404e-05	32.2682	-0.016816	0.00296029	1.3e-08	0.0286185	0.0257689	0.266747
rs3730399	G	A	0.064399	0.000103918	37.5071	-0.0227905	0.00372131	9.1e-10	0.0343537	0.0271627	0.205965
rs4704043	T	C	0.713608	9.16393e-05	33.075	0.0116082	0.00201843	8.9e-09	0.0238323	0.0180528	0.186787
rs4852252	C	T	0.563856	8.51101e-05	30.7183	0.0101929	0.00183907	3e-08	-0.00791142	0.0167815	0.637328
rs56229818	C	T	0.484413	8.51018e-05	30.7153	-0.0101193	0.00182588	3e-08	0.0220296	0.0168533	0.191166
rs58638214	T	C	0.397608	0.00013054	47.1171	-0.0128312	0.00186929	6.7e-12	-0.0189623	0.0168257	0.25975
rs6028090	A	G	0.55468	0.000127085	45.8698	0.0125335	0.00185058	1.3e-11	-0.0255453	0.0169562	0.131928
rs613872	T	G	0.826663	0.000117277	42.3293	-0.01571	0.00241465	7.7e-11	-0.00481817	0.0229024	0.833373
rs6449708	C	T	0.531571	9.22683e-05	33.302	-0.0105772	0.00183288	7.9e-09	0.0133793	0.0167439	0.424257
rs6780848	G	T	0.269946	8.46204e-05	30.5415	0.0113678	0.00205698	3.3e-08	-0.025221	0.0179554	0.160126
rs7020477	G	A	0.266981	9.2949e-05	33.5478	-0.011973	0.00206714	7e-09	-0.0221163	0.022284	0.320965
rs7209653	C	T	0.294886	0.000124042	44.7716	-0.013395	0.00200189	2.2e-11	-0.0116717	0.0189742	0.538464
rs72847500	C	T	0.121024	8.76168e-05	31.6231	0.015805	0.00281055	1.9e-08	-0.00107122	0.0273489	0.968756
rs7288455	G	A	0.566933	9.04527e-05	32.6467	-0.0105482	0.00184611	1.1e-08	0.0122408	0.0180178	0.496901
rs7335281	G	A	0.779306	9.79684e-05	35.3596	-0.0131066	0.00220412	2.7e-09	-0.0225854	0.0215263	0.294084
rs73578186	T	C	0.323945	0.000108786	39.2643	-0.0122916	0.00196159	3.7e-10	-0.00685685	0.0168629	0.684283
rs7526112	G	T	0.361752	9.04703e-05	32.6531	-0.0108478	0.00189836	1.1e-08	-0.000350502	0.0174362	0.983962
rs75550998	T	G	0.053578	8.28237e-05	29.893	-0.0223915	0.00409541	4.6e-08	0.0944169	0.0516801	0.067708
rs7630869	T	C	0.304231	0.000183535	66.2487	0.0161134	0.00197969	4e-16	-0.0347694	0.0169383	0.0401014
rs7904398	T	C	0.503287	8.62657e-05	31.1354	-0.0102001	0.001828	2.4e-08	-0.0202432	0.0170757	0.235822
rs7968738	A	G	0.263717	9.8797e-05	35.6587	-0.0124184	0.00207961	2.4e-09	-0.0101453	0.0239447	0.671788
rs79720045	C	T	0.400744	0.000125313	45.2304	-0.0127624	0.00189765	1.8e-11	0.0284645	0.016935	0.0928004
rs806795	A	G	0.470383	8.92985e-05	32.2301	0.0103555	0.00182406	1.4e-08	-0.0218071	0.0170713	0.201458
rs8102851	C	T	0.217206	9.24919e-05	33.3828	0.012967	0.00224428	7.6e-09	-0.00299529	0.023653	0.89923
rs9375188	T	C	0.483548	0.000207486	74.8959	0.0158521	0.00183171	5e-18	0.0218606	0.0167584	0.192078
rs9537571	A	G	0.095569	0.000103122	37.2199	0.0189538	0.00310676	1.1e-09	0.0405122	0.0319744	0.205149
SNP	EA	OA	Eaf	R2	FSTAT	Exposure			Migraine with no aura
									GWAS from IHGC
						Beta	Se	P-value	Beta	Se	P-value
rs10208088	T	C	0.579637	8.50185e-05	30.6852	-0.0102417	0.00184887	3e-08	-0.01434	0.021443	0.50369
rs1037091	T	C	0.327191	0.000168769	60.9178	-0.0154792	0.00198324	5.9e-15	0.010575	0.022313	0.635568
rs10518019	G	A	0.476252	8.23939e-05	29.7378	0.00994352	0.00182341	4.9e-08	-0.01933	0.021637	0.371664
rs10828248	G	A	0.344788	8.54644e-05	30.8461	0.0106528	0.00191806	2.8e-08	0.021902	0.022758	0.335853
rs11259902	A	C	0.200416	8.837e-05	31.8949	0.0129081	0.0022856	1.6e-08	-0.047083	0.026024	0.070429
rs112600282	G	A	0.110458	9.27645e-05	33.4812	-0.0169117	0.00292271	7.2e-09	-0.036381	0.035224	0.301658
rs113851275	A	G	0.107713	0.000110807	39.9937	0.018611	0.00294288	2.5e-10	0.047301	0.036716	0.197625
rs11634155	C	T	0.335422	9.85114e-05	35.5556	-0.0116134	0.00194762	2.5e-09	-0.014863	0.022748	0.513513
rs11652437	A	C	0.323689	0.000115734	41.7723	0.0127835	0.0019779	1e-10	0.000556	0.046593	0.990472
rs11749912	G	A	0.574515	0.000133695	48.2559	-0.0128828	0.00185453	3.7e-12	0.023383	0.02182	0.283866
rs11766392	T	G	0.284846	0.000109673	39.5844	-0.0127364	0.00202434	3.1e-10	-0.025296	0.024974	0.311094
rs11942953	C	T	0.536706	8.95582e-05	32.3238	-0.010456	0.00183909	1.3e-08	0.00851	0.021541	0.692827
rs12128707	G	A	0.263894	9.28647e-05	33.5174	0.012036	0.00207896	7.1e-09	0.030081	0.024483	0.219189
rs12145677	A	G	0.297237	0.000168337	60.7618	0.0155784	0.00199851	6.4e-15	0.000866	0.022553	0.96936
rs1229984	C	T	0.97263	0.000107806	38.9105	-0.0344455	0.00552202	4.4e-10	-0.022267	0.069125	0.74736
rs12521638	G	A	0.447056	8.32743e-05	30.0556	0.0100771	0.00183811	4.2e-08	-0.03778	0.022382	0.091424
rs12706626	A	G	0.383718	8.52303e-05	30.7616	0.0104093	0.00187679	2.9e-08	-0.012488	0.023114	0.589031
rs12820967	C	T	0.322363	0.000101284	36.5564	0.0118918	0.00196682	1.5e-09	0.001042	0.026861	0.969049
rs13262595	G	A	0.560611	0.000200491	72.3702	0.0156317	0.00183749	1.8e-17	0.022189	0.023444	0.343902
rs13422733	T	C	0.125533	8.34383e-05	30.1148	-0.0151513	0.00276095	4.1e-08	0.011069	0.035351	0.754207
rs136553	T	C	0.376531	9.97258e-05	35.9939	0.0113107	0.00188527	2e-09	-0.027591	0.021771	0.205016
rs1395020	A	G	0.302632	8.44098e-05	30.4655	-0.0109994	0.0019928	3.4e-08	0.057786	0.023615	0.014423
rs1448355	T	C	0.618488	0.000117091	42.2624	0.0122611	0.00188604	8e-11	0.005458	0.02428	0.822139
rs1469249	A	G	0.210879	9.21975e-05	33.2765	-0.0129674	0.00224793	8e-09	-0.006079	0.026478	0.818409
rs1648906	A	G	0.321177	8.70768e-05	31.4281	-0.0110407	0.00196941	2.1e-08	0.001861	0.021953	0.932425
rs166835	T	C	0.556188	9.55339e-05	34.4808	-0.0108229	0.00184312	4.3e-09	-0.015232	0.021817	0.485087
rs16912540	G	A	0.136623	9.79767e-05	35.3626	-0.0158246	0.00266109	2.7e-09	0.021806	0.030301	0.471751
rs17167210	A	G	0.435554	0.000106132	38.3063	-0.0113974	0.00184149	6e-10	0.016658	0.021786	0.444512
rs17789218	C	T	0.245186	9.93867e-05	35.8715	0.0126948	0.00211958	2.1e-09	-0.036716	0.027267	0.17812
rs17862355	G	T	0.442114	0.000103185	37.2426	-0.0112104	0.00183696	1e-09	-0.000949	0.021696	0.965105
rs1987942	C	T	0.616935	9.43306e-05	34.0465	-0.0110584	0.0018952	5.4e-09	-0.055744	0.021528	0.009633
rs2032780	C	T	0.405991	0.00012017	43.3737	0.0123498	0.00187519	4.5e-11	-0.010519	0.021838	0.630064
rs2041687	G	T	0.549172	0.000108691	39.2302	0.0117094	0.00186949	3.8e-10	0.036653	0.02154	0.088835
rs2068625	C	T	0.698468	0.000140674	50.7755	0.0141749	0.00198926	1e-12	0.004324	0.0236	0.854607
rs206965	C	T	0.791153	9.22529e-05	33.2965	-0.0129444	0.00224327	7.9e-09	-0.034713	0.026485	0.189963
rs2120461	T	C	0.661091	0.000110831	40.0024	0.0121844	0.00192646	2.5e-10	0.010785	0.02255	0.632465
rs246723	G	A	0.590096	9.00523e-05	32.5022	-0.0106669	0.00187103	1.2e-08	0.002679	0.022145	0.903703
rs2588543	T	C	0.67203	8.66846e-05	31.2866	0.0109083	0.00195019	2.2e-08	-0.002284	0.022964	0.920758
rs2734833	A	G	0.606682	0.000121144	43.7254	0.0123753	0.00187149	3.8e-11	-0.030272	0.021289	0.155026
rs2748985	C	T	0.544439	0.000128684	46.447	0.012497	0.00183369	9.4e-12	0.02525	0.022906	0.270297
rs2761438	G	A	0.623567	0.000100498	36.2726	-0.0113335	0.0018818	1.7e-09	-0.020773	0.021981	0.344619
rs28710456	C	T	0.49014	8.9841e-05	32.4259	-0.0104057	0.00182736	1.2e-08	0.024017	0.021585	0.265836
rs306755	C	T	0.47539	8.91552e-05	32.1783	0.0103722	0.00182847	1.4e-08	-0.042936	0.021311	0.043944
rs34238696	G	A	0.106778	8.9404e-05	32.2682	-0.016816	0.00296029	1.3e-08	0.01327	0.035791	0.710822
rs3730399	G	A	0.064399	0.000103918	37.5071	-0.0227905	0.00372131	9.1e-10	0.048567	0.040052	0.225267
rs4704043	T	C	0.713608	9.16393e-05	33.075	0.0116082	0.00201843	8.9e-09	0.01289	0.024061	0.59218
rs4852252	C	T	0.563856	8.51101e-05	30.7183	0.0101929	0.00183907	3e-08	0.036596	0.021529	0.089158
rs56229818	C	T	0.484413	8.51018e-05	30.7153	-0.0101193	0.00182588	3e-08	0.00055	0.021197	0.979278
rs58638214	T	C	0.397608	0.00013054	47.1171	-0.0128312	0.00186929	6.7e-12	-0.021821	0.021938	0.31988
rs6028090	A	G	0.55468	0.000127085	45.8698	0.0125335	0.00185058	1.3e-11	0.027701	0.024036	0.249112
rs613872	T	G	0.826663	0.000117277	42.3293	-0.01571	0.00241465	7.7e-11	-0.018498	0.027928	0.507774
rs6449708	C	T	0.531571	9.22683e-05	33.302	-0.0105772	0.00183288	7.9e-09	-0.022359	0.021335	0.294619
rs6780848	G	T	0.269946	8.46204e-05	30.5415	0.0113678	0.00205698	3.3e-08	0.001643	0.024367	0.946216
rs6935828	T	C	0.556131	8.49205e-05	30.6498	0.0101667	0.00183639	3.1e-08	-0.011774	0.021228	0.579148
rs7020477	G	A	0.266981	9.2949e-05	33.5478	-0.011973	0.00206714	7e-09	0.024557	0.025481	0.335175
rs7209653	C	T	0.294886	0.000124042	44.7716	-0.013395	0.00200189	2.2e-11	0.03798	0.023211	0.101771
rs7281293	C	A	0.247862	9.74962e-05	35.1891	0.0126268	0.00212857	3e-09	0.058379	0.024216	0.015939
rs72828532	C	T	0.179279	0.000120152	43.3671	0.0156839	0.00238162	4.5e-11	-0.046263	0.027951	0.097893
rs72847500	C	T	0.121024	8.76168e-05	31.6231	0.015805	0.00281055	1.9e-08	0.044268	0.032262	0.169999
rs7288455	G	A	0.566933	9.04527e-05	32.6467	-0.0105482	0.00184611	1.1e-08	0.029749	0.02205	0.177264
rs7335281	G	A	0.779306	9.79684e-05	35.3596	-0.0131066	0.00220412	2.7e-09	-0.01764	0.025569	0.49028
rs73578186	T	C	0.323945	0.000108786	39.2643	-0.0122916	0.00196159	3.7e-10	-0.034359	0.022399	0.125037
rs7526112	G	T	0.361752	9.04703e-05	32.6531	-0.0108478	0.00189836	1.1e-08	0.015621	0.022233	0.48232
rs75550998	T	G	0.053578	8.28237e-05	29.893	-0.0223915	0.00409541	4.6e-08	0.050424	0.064321	0.433083
rs7564844	A	G	0.700653	0.000106537	38.4526	-0.0123434	0.00199054	5.6e-10	0.015507	0.023125	0.502489
rs7630869	T	C	0.304231	0.000183535	66.2487	0.0161134	0.00197969	4e-16	0.038555	0.022832	0.091294
rs76824303	C	A	0.099986	0.000118833	42.8911	-0.0204431	0.00312149	5.8e-11	-0.000995	0.035585	0.977681
rs7904398	T	C	0.503287	8.62657e-05	31.1354	-0.0102001	0.001828	2.4e-08	0.010595	0.021495	0.622109
rs7968738	A	G	0.263717	9.8797e-05	35.6587	-0.0124184	0.00207961	2.4e-09	-0.011691	0.024826	0.63773
rs79720045	C	T	0.400744	0.000125313	45.2304	-0.0127624	0.00189765	1.8e-11	0.043256	0.025883	0.094672
rs806795	A	G	0.470383	8.92985e-05	32.2301	0.0103555	0.00182406	1.4e-08	-0.039477	0.02124	0.063095
rs8102851	C	T	0.217206	9.24919e-05	33.3828	0.012967	0.00224428	7.6e-09	0.028163	0.026791	0.293137
rs9375188	T	C	0.483548	0.000207486	74.8959	0.0158521	0.00183171	5e-18	-0.014129	0.020813	0.497262
rs9537571	A	G	0.095569	0.000103122	37.2199	0.0189538	0.00310676	1.1e-09	0.064712	0.037743	0.086432

## Sheet: 3.3
Supplementary Table 3.3. Association of computer games play instrumental variants with risk of migraine across 2 databases
SNP	EA	OA	Eaf	R2	FSTAT	Exposure			Overall migraine
									GWAS from FinnGen
						Beta	Se	P-value	Beta	Se	P-value
rs10170573	G	A	0.653742	6.51876e-05	30.1467	-0.00598631	0.00109028	4e-08	-0.00204875	0.010755	0.848923
rs10799961	G	A	0.538182	6.57097e-05	30.3882	0.00573505	0.00104036	3.5e-08	-0.0187886	0.0105866	0.0759381
rs10803798	G	T	0.283764	0.000101218	46.811	0.00797119	0.00116506	7.8e-12	-0.00916032	0.0112645	0.416103
rs11223780	G	A	0.147603	7.1241e-05	32.9464	0.00843755	0.00146998	9.5e-09	0.0169763	0.0153352	0.268287
rs113002196	C	T	0.160255	7.22459e-05	33.4112	0.0081779	0.0014148	7.5e-09	0.0128898	0.0142946	0.367203
rs11548535	T	G	0.146193	6.46805e-05	29.9122	-0.0080211	0.00146659	4.5e-08	0.0233276	0.0143333	0.103628
rs11740196	G	A	0.483797	9.61346e-05	44.4599	-0.00694629	0.00104176	2.6e-11	0.006049	0.0105533	0.566518
rs11743441	T	G	0.57441	9.47457e-05	43.8175	-0.0069739	0.00105354	3.6e-11	0.011873	0.0104984	0.258082
rs1232205	C	T	0.302043	7.48057e-05	34.595	-0.00664828	0.00113032	4.1e-09	0.0113057	0.0111721	0.311554
rs12361956	C	T	0.390141	6.51015e-05	30.1069	-0.00584968	0.0010661	4.1e-08	-0.00965701	0.0105361	0.35937
rs12707117	A	G	0.554656	8.58383e-05	39.6977	0.00657861	0.00104412	3e-10	0.00127976	0.0103548	0.901639
rs13262595	G	A	0.560965	0.000121705	56.287	0.00784032	0.00104503	6.3e-14	0.0010682	0.0105453	0.919315
rs16831510	T	G	0.12778	9.44349e-05	43.6738	0.0102895	0.00155698	3.9e-11	-0.00502874	0.0194117	0.795592
rs17057709	T	C	0.142013	6.72562e-05	31.1035	-0.00829727	0.00148775	2.4e-08	8.52e-05	0.0143962	0.995275
rs2014653	G	A	0.298165	9.46515e-05	43.7739	-0.00753936	0.00113953	3.7e-11	0.0188906	0.0120791	0.11784
rs302719	G	T	0.340108	7.31902e-05	33.8479	-0.0063741	0.0010956	6e-09	-0.0180855	0.0107203	0.0915967
rs34217929	A	G	0.255752	0.000139426	64.4837	0.00951987	0.00118551	9.7e-16	0.00852252	0.0122134	0.485303
rs34402857	A	G	0.518956	0.000120724	55.8332	0.00782808	0.00104763	7.9e-14	-0.011391	0.0103617	0.271623
rs4113587	G	T	0.442949	9.65488e-05	44.6515	0.00701884	0.00105038	2.4e-11	-0.00539009	0.0103521	0.602594
rs411844	A	G	0.821429	6.48686e-05	29.9992	-0.00744204	0.00135874	4.3e-08	-0.0120791	0.0156654	0.440665
rs535591	A	G	0.788453	6.53808e-05	30.2361	-0.00701123	0.00127506	3.8e-08	0.0015009	0.0125666	0.90493
rs55668363	A	G	0.221921	0.000193059	89.2937	0.0118487	0.00125389	3.4e-21	-0.00993433	0.0191424	0.603782
rs56176431	C	A	0.176975	6.73876e-05	31.1642	-0.00761543	0.00136416	2.4e-08	0.00665781	0.0130025	0.608622
rs580241	A	G	0.762851	7.32297e-05	33.8662	-0.00726236	0.00124794	5.9e-09	-0.0100066	0.0121817	0.411393
rs623863	G	A	0.65059	7.32042e-05	33.8544	0.00632333	0.00108677	5.9e-09	-0.0078922	0.012522	0.528518
rs6457740	G	A	0.703207	7.9279e-05	36.664	-0.00688167	0.00113651	1.4e-09	0.00060722	0.0134902	0.964098
rs717915	T	C	0.635432	6.57728e-05	30.4174	0.00595146	0.0010791	3.5e-08	0.00186433	0.01061	0.860519
rs7196161	A	G	0.63336	0.000107218	49.5864	0.00757456	0.00107566	1.9e-12	-0.000721232	0.0106224	0.945868
rs7234933	C	T	0.101384	6.51518e-05	30.1302	0.00950587	0.00173177	4e-08	-0.005176	0.015115	0.732018
rs7431945	A	G	0.23204	8.63037e-05	39.913	0.0077916	0.0012333	2.7e-10	0.00808348	0.0129824	0.533515
rs76563988	G	A	0.247709	7.43588e-05	34.3883	-0.00704844	0.00120195	4.5e-09	-0.0122872	0.0113061	0.277133
rs78081759	A	G	0.065694	7.4851e-05	34.616	0.0124027	0.00210803	4e-09	0.00201922	0.0183807	0.912524
rs7824395	G	A	0.314642	7.6644e-05	35.4453	-0.00666649	0.00111974	2.6e-09	-0.0125967	0.0105247	0.231357
rs8062624	C	T	0.114152	9.13797e-05	42.2606	0.0106156	0.00163296	8e-11	-0.0242649	0.0157803	0.124129
rs9444043	C	A	0.375808	7.80057e-05	36.0751	-0.00647103	0.00107738	1.9e-09	0.00999055	0.0107879	0.354399
rs9661614	C	T	0.297459	8.65534e-05	40.0284	0.00718391	0.00113547	2.5e-10	-0.0168854	0.011004	0.124913
rs9688977	C	T	0.144598	7.43351e-05	34.3774	0.00866393	0.00147767	4.5e-09	-0.00712314	0.0134831	0.59729
rs9842435	G	A	0.875509	0.000106808	49.3965	-0.0110557	0.00157303	2.1e-12	-0.00330595	0.0129368	0.798302
SNP	EA	OA	Eaf	R2	FSTAT	Exposure			Overall migraine
									GWAS from IHGC
						Beta	Se	P-value	Beta	Se	P-value
rs10170573	G	A	0.653742	6.51876e-05	30.1467	-0.00598631	0.00109028	4e-08	-0.005185	0.008056	0.51983
rs10174164	A	G	0.283675	0.000101212	46.8085	0.0079707	0.00116502	7.8e-12	0.003477	0.008334	0.67658
rs10799961	G	A	0.538182	6.57097e-05	30.3882	0.00573505	0.00104036	3.5e-08	0.003417	0.00761	0.653409
rs113002196	C	T	0.160255	7.22459e-05	33.4112	0.0081779	0.0014148	7.5e-09	0.018901	0.010263	0.06553
rs11740196	G	A	0.483797	9.61346e-05	44.4599	-0.00694629	0.00104176	2.6e-11	-0.000717	0.008079	0.929246
rs11743441	T	G	0.57441	9.47457e-05	43.8175	-0.0069739	0.00105354	3.6e-11	-0.005245	0.007717	0.496699
rs1232205	C	T	0.302043	7.48057e-05	34.595	-0.00664828	0.00113032	4.1e-09	0.010462	0.008246	0.204512
rs12361956	C	T	0.390141	6.51015e-05	30.1069	-0.00584968	0.0010661	4.1e-08	0.009307	0.007826	0.234344
rs12707117	A	G	0.554656	8.58383e-05	39.6977	0.00657861	0.00104412	3e-10	0.00804	0.007641	0.292678
rs144377835	T	C	0.038614	9.20173e-05	42.5555	0.0179376	0.0027497	6.9e-11	0.011442	0.023114	0.6206
rs16831510	T	G	0.12778	9.44349e-05	43.6738	0.0102895	0.00155698	3.9e-11	0.00992	0.011859	0.402904
rs17057709	T	C	0.142013	6.72562e-05	31.1035	-0.00829727	0.00148775	2.4e-08	0.003304	0.011603	0.775841
rs1980062	C	T	0.117754	7.04584e-05	32.5845	0.00921404	0.00161415	1.1e-08	-0.012247	0.011717	0.295894
rs2014653	G	A	0.298165	9.46515e-05	43.7739	-0.00753936	0.00113953	3.7e-11	-0.011932	0.00852	0.16135
rs34126521	C	T	0.146345	6.46695e-05	29.9071	-0.0080208	0.00146666	4.5e-08	0.01453	0.01053	0.167608
rs34217929	A	G	0.255752	0.000139426	64.4837	0.00951987	0.00118551	9.7e-16	0.000993	0.008699	0.909147
rs3757589	A	G	0.389229	6.85268e-05	31.6911	-0.00598404	0.00106298	1.8e-08	-0.014265	0.008053	0.076505
rs4113587	G	T	0.442949	9.65488e-05	44.6515	0.00701884	0.00105038	2.4e-11	0.001926	0.007698	0.802397
rs4938017	T	C	0.392707	0.000175607	81.2204	-0.00959769	0.00106496	2e-19	0.004785	0.007765	0.537779
rs535591	A	G	0.788453	6.53808e-05	30.2361	-0.00701123	0.00127506	3.8e-08	0.007629	0.009464	0.42018
rs580241	A	G	0.762851	7.32297e-05	33.8662	-0.00726236	0.00124794	5.9e-09	0.007812	0.009195	0.395547
rs623863	G	A	0.65059	7.32042e-05	33.8544	0.00632333	0.00108677	5.9e-09	-0.00326	0.008088	0.686943
rs6457740	G	A	0.703207	7.9279e-05	36.664	-0.00688167	0.00113651	1.4e-09	-0.009411	0.008489	0.267555
rs6536378	G	T	0.652758	6.5474e-05	30.2792	0.00599444	0.00108937	3.7e-08	-0.000975	0.008034	0.903414
rs717915	T	C	0.635432	6.57728e-05	30.4174	0.00595146	0.0010791	3.5e-08	0.008981	0.007946	0.258371
rs7196161	A	G	0.63336	0.000107218	49.5864	0.00757456	0.00107566	1.9e-12	-0.001393	0.007859	0.859271
rs7234933	C	T	0.101384	6.51518e-05	30.1302	0.00950587	0.00173177	4e-08	0.001532	0.012521	0.902607
rs7431945	A	G	0.23204	8.63037e-05	39.913	0.0077916	0.0012333	2.7e-10	0.004387	0.009299	0.63711
rs76563988	G	A	0.247709	7.43588e-05	34.3883	-0.00704844	0.00120195	4.5e-09	-0.01953	0.008744	0.025533
rs78081759	A	G	0.065694	7.4851e-05	34.616	0.0124027	0.00210803	4e-09	0.009018	0.015996	0.572948
rs7824395	G	A	0.314642	7.6644e-05	35.4453	-0.00666649	0.00111974	2.6e-09	-0.002318	0.008058	0.773649
rs7907706	A	G	0.764312	6.47017e-05	29.922	0.00669591	0.00122409	4.5e-08	0.002338	0.009103	0.79729
rs8062624	C	T	0.114152	9.13797e-05	42.2606	0.0106156	0.00163296	8e-11	0.00202	0.01192	0.865444
rs9444043	C	A	0.375808	7.80057e-05	36.0751	-0.00647103	0.00107738	1.9e-09	-0.013298	0.00796	0.094814
rs9661614	C	T	0.297459	8.65534e-05	40.0284	0.00718391	0.00113547	2.5e-10	-0.009122	0.008212	0.266597
rs9842435	G	A	0.875509	0.000106808	49.3965	-0.0110557	0.00157303	2.1e-12	-0.003136	0.011137	0.778268
SNP	EA	OA	Eaf	R2	FSTAT	Exposure			Migraine with aura
									GWAS from FinnGen
						Beta	Se	P-value	Beta	Se	P-value
rs10170573	G	A	0.653742	6.51876e-05	30.1467	-0.00598631	0.00109028	4e-08	-0.00352922	0.0160101	0.825531
rs10799961	G	A	0.538182	6.57097e-05	30.3882	0.00573505	0.00104036	3.5e-08	-0.00757605	0.0157677	0.630888
rs10803798	G	T	0.283764	0.000101218	46.811	0.00797119	0.00116506	7.8e-12	-0.00774619	0.0167723	0.644193
rs11223780	G	A	0.147603	7.1241e-05	32.9464	0.00843755	0.00146998	9.5e-09	0.0104329	0.0228068	0.64735
rs113002196	C	T	0.160255	7.22459e-05	33.4112	0.0081779	0.0014148	7.5e-09	0.0170722	0.0212864	0.42254
rs11548535	T	G	0.146193	6.46805e-05	29.9122	-0.0080211	0.00146659	4.5e-08	0.00392626	0.0213487	0.854083
rs11740196	G	A	0.483797	9.61346e-05	44.4599	-0.00694629	0.00104176	2.6e-11	0.00480636	0.0157104	0.759654
rs11743441	T	G	0.57441	9.47457e-05	43.8175	-0.0069739	0.00105354	3.6e-11	0.0117908	0.0156416	0.450961
rs12129719	A	G	0.551791	8.00061e-05	37.0002	0.00637039	0.00104728	1.2e-09	0.0185254	0.0155541	0.233642
rs12138787	C	T	0.124336	7.05021e-05	32.6047	0.00896457	0.00156996	1.1e-08	-0.0205578	0.0222835	0.356238
rs1232205	C	T	0.302043	7.48057e-05	34.595	-0.00664828	0.00113032	4.1e-09	0.0122598	0.0166432	0.461352
rs12361956	C	T	0.390141	6.51015e-05	30.1069	-0.00584968	0.0010661	4.1e-08	-0.0194084	0.0156829	0.215881
rs12707117	A	G	0.554656	8.58383e-05	39.6977	0.00657861	0.00104412	3e-10	0.00533726	0.0154041	0.728979
rs13262595	G	A	0.560965	0.000121705	56.287	0.00784032	0.00104503	6.3e-14	0.0131702	0.0156938	0.401358
rs144377835	T	C	0.038614	9.20173e-05	42.5555	0.0179376	0.0027497	6.9e-11	0.0577218	0.0315663	0.0674606
rs16831510	T	G	0.12778	9.44349e-05	43.6738	0.0102895	0.00155698	3.9e-11	-0.0254948	0.0289522	0.378544
rs17057709	T	C	0.142013	6.72562e-05	31.1035	-0.00829727	0.00148775	2.4e-08	0.00723396	0.0214205	0.73558
rs2014653	G	A	0.298165	9.46515e-05	43.7739	-0.00753936	0.00113953	3.7e-11	0.0169337	0.0179773	0.346218
rs302719	G	T	0.340108	7.31902e-05	33.8479	-0.0063741	0.0010956	6e-09	-0.0147453	0.0159603	0.355551
rs34217929	A	G	0.255752	0.000139426	64.4837	0.00951987	0.00118551	9.7e-16	0.0132522	0.0181982	0.466481
rs34402857	A	G	0.518956	0.000120724	55.8332	0.00782808	0.00104763	7.9e-14	0.00950227	0.0154349	0.538135
rs35104374	C	T	0.72506	6.82404e-05	31.5586	-0.00658363	0.00117194	1.9e-08	0.0339563	0.0183531	0.0642895
rs4113587	G	T	0.442949	9.65488e-05	44.6515	0.00701884	0.00105038	2.4e-11	0.0058073	0.0154175	0.70642
rs411844	A	G	0.821429	6.48686e-05	29.9992	-0.00744204	0.00135874	4.3e-08	-0.0370397	0.0233367	0.11247
rs535591	A	G	0.788453	6.53808e-05	30.2361	-0.00701123	0.00127506	3.8e-08	-0.0039321	0.0186949	0.833411
rs55668363	A	G	0.221921	0.000193059	89.2937	0.0118487	0.00125389	3.4e-21	-0.0330593	0.0286473	0.248496
rs56176431	C	A	0.176975	6.73876e-05	31.1642	-0.00761543	0.00136416	2.4e-08	0.00862467	0.0193516	0.655827
rs580241	A	G	0.762851	7.32297e-05	33.8662	-0.00726236	0.00124794	5.9e-09	0.017425	0.0181213	0.336261
rs62241000	T	C	0.32097	6.65745e-05	30.7882	0.00618538	0.00111474	2.9e-08	-0.0400407	0.0186798	0.0320708
rs623863	G	A	0.65059	7.32042e-05	33.8544	0.00632333	0.00108677	5.9e-09	-0.0215292	0.0186571	0.248523
rs6457740	G	A	0.703207	7.9279e-05	36.664	-0.00688167	0.00113651	1.4e-09	0.00864225	0.0201382	0.667816
rs6536378	G	T	0.652758	6.5474e-05	30.2792	0.00599444	0.00108937	3.7e-08	-0.0238508	0.0173508	0.169249
rs717915	T	C	0.635432	6.57728e-05	30.4174	0.00595146	0.0010791	3.5e-08	0.0071604	0.0158229	0.650885
rs7196161	A	G	0.63336	0.000107218	49.5864	0.00757456	0.00107566	1.9e-12	-0.0157679	0.0158189	0.318873
rs7234933	C	T	0.101384	6.51518e-05	30.1302	0.00950587	0.00173177	4e-08	-0.0206628	0.022537	0.359226
rs7431945	A	G	0.23204	8.63037e-05	39.913	0.0077916	0.0012333	2.7e-10	0.0201301	0.019314	0.297295
rs76563988	G	A	0.247709	7.43588e-05	34.3883	-0.00704844	0.00120195	4.5e-09	-0.0182618	0.016829	0.277859
rs78081759	A	G	0.065694	7.4851e-05	34.616	0.0124027	0.00210803	4e-09	-0.0334314	0.0273544	0.221648
rs7824395	G	A	0.314642	7.6644e-05	35.4453	-0.00666649	0.00111974	2.6e-09	-0.0160381	0.0156651	0.305924
rs7907706	A	G	0.764312	6.47017e-05	29.922	0.00669591	0.00122409	4.5e-08	0.00566331	0.021511	0.792339
rs8062624	C	T	0.114152	9.13797e-05	42.2606	0.0106156	0.00163296	8e-11	-0.0209035	0.0234202	0.372101
rs9444043	C	A	0.375808	7.80057e-05	36.0751	-0.00647103	0.00107738	1.9e-09	-0.00565796	0.0160369	0.724232
rs9661614	C	T	0.297459	8.65534e-05	40.0284	0.00718391	0.00113547	2.5e-10	-0.0291644	0.0163563	0.0745762
rs9688977	C	T	0.144598	7.43351e-05	34.3774	0.00866393	0.00147767	4.5e-09	0.00894008	0.0200573	0.655793
rs9842435	G	A	0.875509	0.000106808	49.3965	-0.0110557	0.00157303	2.1e-12	0.011844	0.0192348	0.538055
SNP	EA	OA	Eaf	R2	FSTAT	Exposure			Migraine with aura
									GWAS from IHGC
						Beta	Se	P-value	Beta	Se	P-value
rs10170573	G	A	0.653742	6.51876e-05	30.1467	-0.00598631	0.00109028	4e-08	-0.004113	0.021616	0.849066
rs10174164	A	G	0.283675	0.000101212	46.8085	0.0079707	0.00116502	7.8e-12	-0.004189	0.022752	0.853923
rs10799961	G	A	0.538182	6.57097e-05	30.3882	0.00573505	0.00104036	3.5e-08	0.041541	0.021007	0.048003
rs11223780	G	A	0.147603	7.1241e-05	32.9464	0.00843755	0.00146998	9.5e-09	0.023095	0.032744	0.480621
rs113002196	C	T	0.160255	7.22459e-05	33.4112	0.0081779	0.0014148	7.5e-09	0.046114	0.028492	0.105551
rs11740196	G	A	0.483797	9.61346e-05	44.4599	-0.00694629	0.00104176	2.6e-11	0.033548	0.023437	0.152289
rs11743441	T	G	0.57441	9.47457e-05	43.8175	-0.0069739	0.00105354	3.6e-11	0.02357	0.021823	0.280117
rs12129719	A	G	0.551791	8.00061e-05	37.0002	0.00637039	0.00104728	1.2e-09	0.023093	0.021513	0.283052
rs1232205	C	T	0.302043	7.48057e-05	34.595	-0.00664828	0.00113032	4.1e-09	0.017253	0.02284	0.450044
rs12361956	C	T	0.390141	6.51015e-05	30.1069	-0.00584968	0.0010661	4.1e-08	-0.01192	0.021667	0.582235
rs12707117	A	G	0.554656	8.58383e-05	39.6977	0.00657861	0.00104412	3e-10	-0.013481	0.021578	0.532141
rs13262595	G	A	0.560965	0.000121705	56.287	0.00784032	0.00104503	6.3e-14	0.022189	0.023444	0.343902
rs144377835	T	C	0.038614	9.20173e-05	42.5555	0.0179376	0.0027497	6.9e-11	0.030301	0.057322	0.597108
rs159962	T	C	0.339585	7.31385e-05	33.824	-0.00637516	0.00109617	6e-09	-0.011649	0.022323	0.601798
rs16831510	T	G	0.12778	9.44349e-05	43.6738	0.0102895	0.00155698	3.9e-11	-0.027328	0.032646	0.402531
rs17057709	T	C	0.142013	6.72562e-05	31.1035	-0.00829727	0.00148775	2.4e-08	-0.013667	0.034677	0.693499
rs1980062	C	T	0.117754	7.04584e-05	32.5845	0.00921404	0.00161415	1.1e-08	0.031678	0.032316	0.326959
rs2014653	G	A	0.298165	9.46515e-05	43.7739	-0.00753936	0.00113953	3.7e-11	-0.00711	0.023581	0.763036
rs34126521	C	T	0.146345	6.46695e-05	29.9071	-0.0080208	0.00146666	4.5e-08	0.022234	0.029198	0.446371
rs34217929	A	G	0.255752	0.000139426	64.4837	0.00951987	0.00118551	9.7e-16	-0.014902	0.024783	0.547665
rs34402857	A	G	0.518956	0.000120724	55.8332	0.00782808	0.00104763	7.9e-14	-0.025105	0.021942	0.252536
rs35104374	C	T	0.72506	6.82404e-05	31.5586	-0.00658363	0.00117194	1.9e-08	0.06879	0.026355	0.009068
rs3757589	A	G	0.389229	6.85268e-05	31.6911	-0.00598404	0.00106298	1.8e-08	-0.036725	0.023214	0.113637
rs4113587	G	T	0.442949	9.65488e-05	44.6515	0.00701884	0.00105038	2.4e-11	-0.013608	0.021307	0.523071
rs411844	A	G	0.821429	6.48686e-05	29.9992	-0.00744204	0.00135874	4.3e-08	-0.044669	0.030277	0.140098
rs4938017	T	C	0.392707	0.000175607	81.2204	-0.00959769	0.00106496	2e-19	0.029747	0.021369	0.163884
rs535591	A	G	0.788453	6.53808e-05	30.2361	-0.00701123	0.00127506	3.8e-08	0.055221	0.026701	0.038644
rs55668363	A	G	0.221921	0.000193059	89.2937	0.0118487	0.00125389	3.4e-21	-0.008959	0.033457	0.788873
rs56176431	C	A	0.176975	6.73876e-05	31.1642	-0.00761543	0.00136416	2.4e-08	-0.015095	0.027369	0.581298
rs580241	A	G	0.762851	7.32297e-05	33.8662	-0.00726236	0.00124794	5.9e-09	0.030438	0.025041	0.224136
rs62241000	T	C	0.32097	6.65745e-05	30.7882	0.00618538	0.00111474	2.9e-08	-0.037745	0.022957	0.100149
rs623863	G	A	0.65059	7.32042e-05	33.8544	0.00632333	0.00108677	5.9e-09	9e-05	0.022497	0.996806
rs6457740	G	A	0.703207	7.9279e-05	36.664	-0.00688167	0.00113651	1.4e-09	0.006765	0.023815	0.776348
rs6536378	G	T	0.652758	6.5474e-05	30.2792	0.00599444	0.00108937	3.7e-08	0.004371	0.022717	0.847409
rs717915	T	C	0.635432	6.57728e-05	30.4174	0.00595146	0.0010791	3.5e-08	0.004688	0.022169	0.832503
rs7196161	A	G	0.63336	0.000107218	49.5864	0.00757456	0.00107566	1.9e-12	-0.023742	0.02177	0.275425
rs7234933	C	T	0.101384	6.51518e-05	30.1302	0.00950587	0.00173177	4e-08	0.010206	0.035107	0.771273
rs7431945	A	G	0.23204	8.63037e-05	39.913	0.0077916	0.0012333	2.7e-10	-0.04608	0.027329	0.091772
rs76563988	G	A	0.247709	7.43588e-05	34.3883	-0.00704844	0.00120195	4.5e-09	0.000693	0.024229	0.977155
rs78081759	A	G	0.065694	7.4851e-05	34.616	0.0124027	0.00210803	4e-09	-0.015186	0.046842	0.745795
rs7824395	G	A	0.314642	7.6644e-05	35.4453	-0.00666649	0.00111974	2.6e-09	0.017622	0.02265	0.436551
rs7907706	A	G	0.764312	6.47017e-05	29.922	0.00669591	0.00122409	4.5e-08	0.028018	0.026162	0.284173
rs8062624	C	T	0.114152	9.13797e-05	42.2606	0.0106156	0.00163296	8e-11	0.026451	0.033617	0.43138
rs9444043	C	A	0.375808	7.80057e-05	36.0751	-0.00647103	0.00107738	1.9e-09	-0.021557	0.022071	0.3287
rs9661614	C	T	0.297459	8.65534e-05	40.0284	0.00718391	0.00113547	2.5e-10	-0.000377	0.022591	0.986662
rs9688977	C	T	0.144598	7.43351e-05	34.3774	0.00866393	0.00147767	4.5e-09	-0.061406	0.029392	0.036712
rs9842435	G	A	0.875509	0.000106808	49.3965	-0.0110557	0.00157303	2.1e-12	-0.052888	0.030356	0.081467
SNP	EA	OA	Eaf	R2	FSTAT	Exposure			Migraine with no aura
									GWAS from FinnGen
						Beta	Se	P-value	Beta	Se	P-value
rs10170573	G	A	0.653742	6.51876e-05	30.1467	-0.00598631	0.00109028	4e-08	-0.0075315	0.017427	0.665615
rs10799961	G	A	0.538182	6.57097e-05	30.3882	0.00573505	0.00104036	3.5e-08	-0.00488126	0.0171428	0.775843
rs10803798	G	T	0.283764	0.000101218	46.811	0.00797119	0.00116506	7.8e-12	-0.0180855	0.0182465	0.321601
rs113002196	C	T	0.160255	7.22459e-05	33.4112	0.0081779	0.0014148	7.5e-09	0.0150205	0.0230874	0.515309
rs11740196	G	A	0.483797	9.61346e-05	44.4599	-0.00694629	0.00104176	2.6e-11	-0.00203911	0.0170989	0.905074
rs11743441	T	G	0.57441	9.47457e-05	43.8175	-0.0069739	0.00105354	3.6e-11	0.00996684	0.0170185	0.558112
rs12138787	C	T	0.124336	7.05021e-05	32.6047	0.00896457	0.00156996	1.1e-08	-0.0483294	0.0242931	0.0466541
rs1232205	C	T	0.302043	7.48057e-05	34.595	-0.00664828	0.00113032	4.1e-09	0.0119159	0.0180979	0.510272
rs12361956	C	T	0.390141	6.51015e-05	30.1069	-0.00584968	0.0010661	4.1e-08	0.0027407	0.0170774	0.872498
rs12707117	A	G	0.554656	8.58383e-05	39.6977	0.00657861	0.00104412	3e-10	-0.0287723	0.0167736	0.0862839
rs13262595	G	A	0.560965	0.000121705	56.287	0.00784032	0.00104503	6.3e-14	-0.00658191	0.0170934	0.700197
rs144377835	T	C	0.038614	9.20173e-05	42.5555	0.0179376	0.0027497	6.9e-11	0.0282903	0.0343795	0.410575
rs16831510	T	G	0.12778	9.44349e-05	43.6738	0.0102895	0.00155698	3.9e-11	0.043127	0.0314788	0.170677
rs17057709	T	C	0.142013	6.72562e-05	31.1035	-0.00829727	0.00148775	2.4e-08	0.00846395	0.0233413	0.716891
rs2014653	G	A	0.298165	9.46515e-05	43.7739	-0.00753936	0.00113953	3.7e-11	0.0166428	0.0195488	0.394579
rs302719	G	T	0.340108	7.31902e-05	33.8479	-0.0063741	0.0010956	6e-09	-0.0219696	0.0173745	0.206062
rs34217929	A	G	0.255752	0.000139426	64.4837	0.00951987	0.00118551	9.7e-16	0.00437106	0.0197735	0.825048
rs34402857	A	G	0.518956	0.000120724	55.8332	0.00782808	0.00104763	7.9e-14	-0.0308566	0.0167736	0.0658294
rs3757589	A	G	0.389229	6.85268e-05	31.6911	-0.00598404	0.00106298	1.8e-08	-0.0225066	0.0169195	0.183448
rs4113587	G	T	0.442949	9.65488e-05	44.6515	0.00701884	0.00105038	2.4e-11	-0.0222268	0.016793	0.185646
rs411844	A	G	0.821429	6.48686e-05	29.9992	-0.00744204	0.00135874	4.3e-08	-0.0104114	0.0253058	0.680763
rs4938017	T	C	0.392707	0.000175607	81.2204	-0.00959769	0.00106496	2e-19	0.0266476	0.0168308	0.113361
rs535591	A	G	0.788453	6.53808e-05	30.2361	-0.00701123	0.00127506	3.8e-08	-0.00185379	0.020382	0.92753
rs55668363	A	G	0.221921	0.000193059	89.2937	0.0118487	0.00125389	3.4e-21	-0.0098377	0.0309915	0.750915
rs56176431	C	A	0.176975	6.73876e-05	31.1642	-0.00761543	0.00136416	2.4e-08	0.00314931	0.0210458	0.881048
rs580241	A	G	0.762851	7.32297e-05	33.8662	-0.00726236	0.00124794	5.9e-09	-0.00170492	0.0196971	0.931024
rs62241000	T	C	0.32097	6.65745e-05	30.7882	0.00618538	0.00111474	2.9e-08	-0.0408685	0.0203162	0.0442599
rs623863	G	A	0.65059	7.32042e-05	33.8544	0.00632333	0.00108677	5.9e-09	-0.0186381	0.0202645	0.357708
rs6457740	G	A	0.703207	7.9279e-05	36.664	-0.00688167	0.00113651	1.4e-09	-0.0324754	0.0218486	0.137178
rs6536378	G	T	0.652758	6.5474e-05	30.2792	0.00599444	0.00108937	3.7e-08	-0.0287753	0.0188916	0.127714
rs717915	T	C	0.635432	6.57728e-05	30.4174	0.00595146	0.0010791	3.5e-08	-0.0106645	0.0171873	0.534939
rs7196161	A	G	0.63336	0.000107218	49.5864	0.00757456	0.00107566	1.9e-12	0.0266871	0.0172013	0.120792
rs7234933	C	T	0.101384	6.51518e-05	30.1302	0.00950587	0.00173177	4e-08	0.00237415	0.0244899	0.922771
rs7431945	A	G	0.23204	8.63037e-05	39.913	0.0077916	0.0012333	2.7e-10	-0.0150268	0.0210406	0.475117
rs76563988	G	A	0.247709	7.43588e-05	34.3883	-0.00704844	0.00120195	4.5e-09	-0.02318	0.0182864	0.204938
rs78081759	A	G	0.065694	7.4851e-05	34.616	0.0124027	0.00210803	4e-09	0.00212325	0.029764	0.94313
rs7824395	G	A	0.314642	7.6644e-05	35.4453	-0.00666649	0.00111974	2.6e-09	0.0211887	0.0170378	0.213638
rs7907706	A	G	0.764312	6.47017e-05	29.922	0.00669591	0.00122409	4.5e-08	0.0096519	0.0233209	0.678968
rs8062624	C	T	0.114152	9.13797e-05	42.2606	0.0106156	0.00163296	8e-11	-0.0512389	0.0255287	0.0447384
rs9444043	C	A	0.375808	7.80057e-05	36.0751	-0.00647103	0.00107738	1.9e-09	0.0331933	0.0174525	0.0571808
rs9661614	C	T	0.297459	8.65534e-05	40.0284	0.00718391	0.00113547	2.5e-10	-0.023284	0.0178128	0.191162
rs9688977	C	T	0.144598	7.43351e-05	34.3774	0.00866393	0.00147767	4.5e-09	-0.0265532	0.0218553	0.224383
rs9842435	G	A	0.875509	0.000106808	49.3965	-0.0110557	0.00157303	2.1e-12	-0.00955421	0.0209175	0.647845
SNP	EA	OA	Eaf	R2	FSTAT	Exposure			Migraine with no aura
									GWAS from IHGC
						Beta	Se	P-value	Beta	Se	P-value
rs10170573	G	A	0.653742	6.51876e-05	30.1467	-0.00598631	0.00109028	4e-08	0.027677	0.019743	0.160942
rs10174164	A	G	0.283675	0.000101212	46.8085	0.0079707	0.00116502	7.8e-12	-0.006923	0.020621	0.73708
rs10799961	G	A	0.538182	6.57097e-05	30.3882	0.00573505	0.00104036	3.5e-08	-0.002786	0.019069	0.883814
rs11223780	G	A	0.147603	7.1241e-05	32.9464	0.00843755	0.00146998	9.5e-09	-0.005451	0.029327	0.852541
rs113002196	C	T	0.160255	7.22459e-05	33.4112	0.0081779	0.0014148	7.5e-09	-0.003892	0.025738	0.879785
rs11740196	G	A	0.483797	9.61346e-05	44.4599	-0.00694629	0.00104176	2.6e-11	0.002429	0.020881	0.907355
rs11743441	T	G	0.57441	9.47457e-05	43.8175	-0.0069739	0.00105354	3.6e-11	-0.007857	0.019282	0.683688
rs12129719	A	G	0.551791	8.00061e-05	37.0002	0.00637039	0.00104728	1.2e-09	0.031493	0.019488	0.106094
rs1232205	C	T	0.302043	7.48057e-05	34.595	-0.00664828	0.00113032	4.1e-09	0.004115	0.020662	0.842118
rs12361956	C	T	0.390141	6.51015e-05	30.1069	-0.00584968	0.0010661	4.1e-08	0.01649	0.019611	0.400414
rs12707117	A	G	0.554656	8.58383e-05	39.6977	0.00657861	0.00104412	3e-10	0.008577	0.019031	0.65224
rs13262595	G	A	0.560965	0.000121705	56.287	0.00784032	0.00104503	6.3e-14	0.021708	0.02038	0.286789
rs144377835	T	C	0.038614	9.20173e-05	42.5555	0.0179376	0.0027497	6.9e-11	0.061728	0.050516	0.221708
rs159962	T	C	0.339585	7.31385e-05	33.824	-0.00637516	0.00109617	6e-09	-0.013467	0.020131	0.50352
rs16831510	T	G	0.12778	9.44349e-05	43.6738	0.0102895	0.00155698	3.9e-11	0.034125	0.028819	0.236348
rs17057709	T	C	0.142013	6.72562e-05	31.1035	-0.00829727	0.00148775	2.4e-08	-0.029309	0.031377	0.350254
rs1980062	C	T	0.117754	7.04584e-05	32.5845	0.00921404	0.00161415	1.1e-08	-0.011007	0.029489	0.70897
rs2014653	G	A	0.298165	9.46515e-05	43.7739	-0.00753936	0.00113953	3.7e-11	-0.010245	0.021325	0.630953
rs34126521	C	T	0.146345	6.46695e-05	29.9071	-0.0080208	0.00146666	4.5e-08	0.063677	0.025741	0.013392
rs34217929	A	G	0.255752	0.000139426	64.4837	0.00951987	0.00118551	9.7e-16	-0.03496	0.022165	0.114731
rs34402857	A	G	0.518956	0.000120724	55.8332	0.00782808	0.00104763	7.9e-14	-0.037067	0.019788	0.061055
rs35104374	C	T	0.72506	6.82404e-05	31.5586	-0.00658363	0.00117194	1.9e-08	0.037201	0.02369	0.116324
rs3757589	A	G	0.389229	6.85268e-05	31.6911	-0.00598404	0.00106298	1.8e-08	-0.019433	0.020948	0.353566
rs4113587	G	T	0.442949	9.65488e-05	44.6515	0.00701884	0.00105038	2.4e-11	0.030461	0.019321	0.114893
rs411844	A	G	0.821429	6.48686e-05	29.9992	-0.00744204	0.00135874	4.3e-08	-0.019262	0.025988	0.458599
rs4938017	T	C	0.392707	0.000175607	81.2204	-0.00959769	0.00106496	2e-19	0.023825	0.019339	0.217943
rs535591	A	G	0.788453	6.53808e-05	30.2361	-0.00701123	0.00127506	3.8e-08	-0.007248	0.023373	0.756495
rs55668363	A	G	0.221921	0.000193059	89.2937	0.0118487	0.00125389	3.4e-21	0.073132	0.030361	0.016029
rs56176431	C	A	0.176975	6.73876e-05	31.1642	-0.00761543	0.00136416	2.4e-08	-0.041222	0.025073	0.100164
rs580241	A	G	0.762851	7.32297e-05	33.8662	-0.00726236	0.00124794	5.9e-09	0.034574	0.022553	0.125253
rs62241000	T	C	0.32097	6.65745e-05	30.7882	0.00618538	0.00111474	2.9e-08	0.003333	0.020453	0.870539
rs623863	G	A	0.65059	7.32042e-05	33.8544	0.00632333	0.00108677	5.9e-09	-0.004176	0.020163	0.835918
rs6457740	G	A	0.703207	7.9279e-05	36.664	-0.00688167	0.00113651	1.4e-09	-0.023721	0.02117	0.262481
rs6536378	G	T	0.652758	6.5474e-05	30.2792	0.00599444	0.00108937	3.7e-08	0.018994	0.020118	0.345095
rs717915	T	C	0.635432	6.57728e-05	30.4174	0.00595146	0.0010791	3.5e-08	0.000788	0.020047	0.968614
rs7196161	A	G	0.63336	0.000107218	49.5864	0.00757456	0.00107566	1.9e-12	-0.009651	0.019625	0.622902
rs7234933	C	T	0.101384	6.51518e-05	30.1302	0.00950587	0.00173177	4e-08	-0.009128	0.03136	0.770985
rs7431945	A	G	0.23204	8.63037e-05	39.913	0.0077916	0.0012333	2.7e-10	-0.008898	0.023493	0.7049
rs76563988	G	A	0.247709	7.43588e-05	34.3883	-0.00704844	0.00120195	4.5e-09	-0.016769	0.022058	0.447137
rs78081759	A	G	0.065694	7.4851e-05	34.616	0.0124027	0.00210803	4e-09	0.046035	0.042053	0.273631
rs7824395	G	A	0.314642	7.6644e-05	35.4453	-0.00666649	0.00111974	2.6e-09	-0.014725	0.020118	0.464213
rs7907706	A	G	0.764312	6.47017e-05	29.922	0.00669591	0.00122409	4.5e-08	0.003355	0.022885	0.883416
rs8062624	C	T	0.114152	9.13797e-05	42.2606	0.0106156	0.00163296	8e-11	-0.010396	0.030336	0.731852
rs9444043	C	A	0.375808	7.80057e-05	36.0751	-0.00647103	0.00107738	1.9e-09	-0.023376	0.020132	0.24558
rs9661614	C	T	0.297459	8.65534e-05	40.0284	0.00718391	0.00113547	2.5e-10	-0.030909	0.020468	0.130998
rs9688977	C	T	0.144598	7.43351e-05	34.3774	0.00866393	0.00147767	4.5e-09	-0.02962	0.02685	0.269923
rs9842435	G	A	0.875509	0.000106808	49.3965	-0.0110557	0.00157303	2.1e-12	0.003081	0.028008	0.912382

## Sheet: 3.4
Supplementary Table 3.4. Association of watching television instrumental variants with risk of migraine across 2 databases
SNP	EA	OA	Eaf	R2	FSTAT	Exposure			Overall migraine
									GWAS from FinnGen
						Beta	Se	P-value	Beta	Se	P-value
rs10109061	G	A	0.443183	7.00412e-05	30.6721	-0.00896843	0.00161936	3.1e-08	-0.0207414	0.0110236	0.0598977
rs10189857	G	A	0.432324	0.00019115	83.7179	0.0146862	0.00160509	5.7e-20	-0.00254184	0.0103717	0.806398
rs10765776	A	C	0.390712	0.000109047	47.7553	-0.0113225	0.00163844	4.8e-12	-0.0140764	0.0117055	0.229153
rs11191129	T	C	0.422818	8.55543e-05	37.4661	-0.00984638	0.00160863	9.3e-10	-0.0130997	0.0104423	0.209666
rs11222919	G	T	0.175374	7.70684e-05	33.7497	-0.0122141	0.00210245	6.3e-09	-0.0197097	0.016306	0.226762
rs11245482	C	T	0.385493	8.85357e-05	38.7719	0.0101886	0.00163627	4.8e-10	0.00210767	0.0107477	0.844529
rs114755463	A	G	0.16775	8.69933e-05	38.0964	0.0132589	0.00214815	6.7e-10	0.00467583	0.0145692	0.748256
rs115608101	T	C	0.130399	7.444e-05	32.5986	-0.0135365	0.00237086	1.1e-08	-0.00957885	0.0211666	0.650876
rs11662211	T	C	0.505628	8.04767e-05	35.2424	-0.00944795	0.00159149	2.9e-09	-0.000250206	0.0105708	0.981116
rs11680095	T	C	0.592713	7.22033e-05	31.619	-0.00918965	0.00163427	1.9e-08	0.00105404	0.0106267	0.920989
rs11696187	T	C	0.160229	8.91231e-05	39.0292	-0.0135653	0.00217137	4.2e-10	-0.0294721	0.0121965	0.0156729
rs11700249	G	T	0.408795	7.73204e-05	33.8601	0.00943299	0.00162108	5.9e-09	0.00771776	0.0105359	0.463852
rs11714337	A	G	0.430094	8.64418e-05	37.8549	-0.00991351	0.00161126	7.6e-10	-0.00202801	0.0105901	0.848133
rs12045585	A	G	0.131234	8.92123e-05	39.0682	-0.0150612	0.00240961	4.1e-10	-0.000461306	0.0149177	0.975331
rs12214364	G	T	0.415458	6.90405e-05	30.2339	0.00904588	0.00164514	3.8e-08	-0.00586581	0.0106931	0.583305
rs1291871	C	T	0.514085	7.50404e-05	32.8615	0.00916233	0.00159831	9.9e-09	-0.00378143	0.0104465	0.717368
rs13014947	A	G	0.574722	9.74196e-05	42.6628	0.0106072	0.00162396	6.5e-11	0.0158459	0.0108024	0.142406
rs13107325	T	C	0.075099	0.000103501	45.3264	0.0203199	0.00301818	1.7e-11	0.0376984	0.0450435	0.402631
rs1324491	A	G	0.130982	7.39171e-05	32.3696	0.0134128	0.00235749	1.3e-08	-0.0169657	0.0151091	0.261487
rs1344707	A	G	0.748938	8.32781e-05	36.4693	-0.0110644	0.00183216	1.6e-09	-0.017366	0.0113748	0.126835
rs17789218	C	T	0.243949	7.95696e-05	34.8451	-0.0109161	0.00184925	3.6e-09	-0.00106224	0.012707	0.933379
rs178203	C	T	0.749551	9.78352e-05	42.8448	0.012014	0.00183543	5.9e-11	0.00621591	0.0128622	0.628903
rs1826510	A	G	0.828498	7.22076e-05	31.6209	-0.0127337	0.00226447	1.9e-08	-0.0205259	0.0126171	0.103773
rs1993092	C	T	0.389657	7.77569e-05	34.0512	-0.00951741	0.00163099	5.4e-09	0.00408031	0.0104811	0.697053
rs2073869	T	C	0.166613	9.50168e-05	41.6104	-0.0138006	0.00213942	1.1e-10	-0.011563	0.0115561	0.317022
rs2106164	C	T	0.531731	7.88115e-05	34.5131	-0.00938934	0.00159824	4.2e-09	-0.00440581	0.0103619	0.670695
rs2185490	C	A	0.617654	7.41479e-05	32.4707	0.00937259	0.0016448	1.2e-08	0.0199796	0.0105519	0.0582975
rs2240857	G	T	0.141014	0.000109355	47.8902	0.0159314	0.00230213	4.5e-12	0.00296893	0.0126635	0.814637
rs2283	G	A	0.339277	6.98576e-05	30.5917	-0.00926961	0.00167594	3.2e-08	0.00599063	0.0121305	0.621413
rs2352984	C	T	0.430943	0.000346323	151.702	0.0197571	0.00160408	7.4e-35	0.0162169	0.0109788	0.139647
rs2479968	G	A	0.05112	7.06123e-05	30.9222	0.0205886	0.00370246	2.7e-08	0.00156558	0.0168716	0.926067
rs249960	G	A	0.182119	7.45177e-05	32.6326	-0.0118041	0.00206636	1.1e-08	-0.0169621	0.0133437	0.203669
rs262890	G	A	0.298989	0.000132533	58.0419	0.0132392	0.00173776	2.6e-14	0.000661854	0.0106274	0.950341
rs2646351	A	G	0.452916	7.10212e-05	31.1013	0.00891407	0.0015984	2.4e-08	-0.00456696	0.0104632	0.662488
rs2678662	G	T	0.608337	0.000106456	46.6206	0.0111458	0.00163238	8.6e-12	0.0228398	0.0106111	0.0313625
rs2725371	G	A	0.695652	0.00013353	58.4786	-0.0132649	0.00173462	2.1e-14	-0.0159202	0.0118113	0.177698
rs2857693	T	G	0.365548	9.56927e-05	41.9064	0.0106577	0.00164635	9.6e-11	0.0228059	0.0110642	0.0392817
rs2906604	C	T	0.497337	9.81754e-05	42.9937	0.0104012	0.00158628	5.5e-11	0.0197178	0.0103781	0.0574394
rs3138499	C	A	0.518183	0.000106542	46.6581	0.0109638	0.00160508	8.5e-12	0.00942864	0.0103225	0.361029
rs35797019	G	A	0.392335	7.31641e-05	32.0398	-0.00921437	0.00162787	1.5e-08	0.00257748	0.0104694	0.805534
rs362312	C	T	0.424168	7.96777e-05	34.8924	-0.00952438	0.00161239	3.5e-09	-0.00557712	0.0104155	0.592328
rs3754970	C	T	0.502922	8.40975e-05	36.8281	0.00970162	0.00159865	1.3e-09	0.004364	0.0104445	0.676074
rs3810496	C	T	0.61619	7.41749e-05	32.4825	0.00937122	0.00164426	1.2e-08	0.011018	0.0105919	0.298235
rs4076457	T	C	0.256946	6.9188e-05	30.2985	-0.0100378	0.00182359	3.7e-08	-0.0140828	0.0126505	0.265613
rs4110177	A	G	0.367281	7.39289e-05	32.3748	0.00942719	0.00165683	1.3e-08	-0.0111393	0.0118543	0.347379
rs4303732	C	T	0.40162	9.99689e-05	43.7793	-0.0107277	0.00162133	3.7e-11	0.0147818	0.0105089	0.159545
rs4339469	G	T	0.62921	0.000132119	57.8605	0.0125288	0.00164709	2.8e-14	0.00180309	0.0111543	0.871581
rs4469687	G	A	0.483936	6.99239e-05	30.6208	0.00879878	0.00159006	3.1e-08	0.000317713	0.0103235	0.975448
rs4567133	A	C	0.810356	9.32152e-05	40.8214	-0.0130235	0.00203837	1.7e-10	-0.00598985	0.0114602	0.601208
rs4747438	T	C	0.676512	0.000109953	48.1523	-0.0118194	0.00170328	3.9e-12	-0.0175974	0.0108111	0.103586
rs57555420	T	C	0.281686	7.52579e-05	32.9568	0.0101749	0.00177238	9.4e-09	0.010393	0.0126815	0.412479
rs6102912	C	T	0.41003	0.000104132	45.6026	-0.0109087	0.00161539	1.4e-11	-0.015453	0.0103489	0.135386
rs61743199	G	A	0.071839	7.27847e-05	31.8736	0.0173842	0.0030792	1.6e-08	0.0213229	0.0238348	0.370996
rs61864793	C	T	0.251695	8.42482e-05	36.8941	-0.0111416	0.00183429	1.2e-09	0.00238441	0.012909	0.853457
rs62145951	C	T	0.263053	0.000101461	44.4327	-0.0120253	0.00180403	2.6e-11	0.00630917	0.0105159	0.548528
rs62199883	A	C	0.48612	0.000173002	75.7681	0.0138426	0.00159028	3.2e-18	0.00112055	0.010498	0.914996
rs6511708	C	T	0.664796	0.000117392	51.4102	-0.0120822	0.00168508	7.5e-13	0.0113037	0.0115871	0.32929
rs68056254	T	G	0.150874	8.40143e-05	36.7917	0.0134953	0.00222488	1.3e-09	-0.0141234	0.0136319	0.300175
rs6814554	A	G	0.47436	0.000163994	71.8223	0.0135276	0.00159621	2.4e-17	0.0237558	0.0104285	0.0227285
rs6850494	C	A	0.386016	7.97815e-05	34.9379	0.00966003	0.00163429	3.4e-09	0.0208995	0.0105092	0.0467348
rs6895658	C	T	0.193239	9.49545e-05	41.5831	-0.0129815	0.0020131	1.1e-10	0.019258	0.013433	0.151677
rs6994132	C	T	0.579236	8.73437e-05	38.2498	-0.00996299	0.00161092	6.2e-10	0.00260893	0.0105304	0.804327
rs7184800	A	G	0.302842	0.00013809	60.4758	-0.0134542	0.00173008	7.4e-15	-0.0258652	0.011851	0.029071
rs73946726	A	C	0.02024	7.15868e-05	31.3491	0.0319589	0.00570793	2.2e-08	-0.0475715	0.0776407	0.540066
rs749056	G	T	0.304306	7.64559e-05	33.4815	-0.0100199	0.00173165	7.2e-09	-0.0119829	0.0109717	0.27476
rs749671	A	G	0.371805	0.000103641	45.3876	-0.0110813	0.00164483	1.6e-11	0.00182882	0.0106276	0.863373
rs7798292	A	G	0.43452	8.39511e-05	36.764	-0.00972203	0.00160341	1.3e-09	-0.0111526	0.0105821	0.291921
rs7899206	G	T	0.492382	8.41524e-05	36.8522	-0.00977557	0.00161031	1.3e-09	0.00888873	0.0105476	0.399382
rs7921305	A	G	0.252545	8.96428e-05	39.2568	-0.0114732	0.00183116	3.7e-10	0.00667403	0.0122457	0.585746
rs79373894	C	T	0.034386	9.55913e-05	41.862	-0.0287273	0.00444001	9.8e-11	-0.0291175	0.0729275	0.689698
rs801733	C	A	0.357688	0.000129522	56.723	-0.0124933	0.00165881	5e-14	-0.00605412	0.0111699	0.587817
rs814197	G	T	0.466816	0.000102637	44.948	-0.0106837	0.00159355	2e-11	0.00554688	0.0104957	0.597158
rs898751	T	C	0.493393	9.05733e-05	39.6643	0.0100214	0.00159121	3e-10	0.00316737	0.0103607	0.759824
rs9300594	G	A	0.253582	8.56416e-05	37.5044	0.0112022	0.0018292	9.1e-10	-0.00252856	0.0106751	0.812761
rs9834970	C	T	0.497804	7.19104e-05	31.4908	-0.0089082	0.00158744	2e-08	0.0167309	0.0105648	0.113273
rs9867121	A	C	0.184147	7.36197e-05	32.2393	-0.0116984	0.00206031	1.4e-08	-0.00872791	0.0138407	0.528305
rs9867437	C	A	0.460371	9.44586e-05	41.3659	-0.0103044	0.00160214	1.3e-10	-0.0119459	0.0103766	0.249634
rs9880023	T	G	0.556427	8.21924e-05	35.9938	0.00964695	0.00160796	2e-09	-0.00374304	0.0108046	0.729019
rs996234	A	G	0.516342	9.34307e-05	40.9157	-0.0105421	0.00164809	1.6e-10	-0.00483807	0.0104041	0.641922
SNP	EA	OA	Eaf	R2	FSTAT	Exposure			Overall migraine
									GWAS from IHGC
						Beta	Se	P-value	Beta	Se	P-value
rs10109061	G	A	0.443183	7.00412e-05	30.6721	-0.00896843	0.00161936	3.1e-08	0.008408	0.007972	0.291555
rs10189857	G	A	0.432324	0.00019115	83.7179	0.0146862	0.00160509	5.7e-20	-0.002352	0.007702	0.760069
rs10269099	T	G	0.391234	7.173e-05	31.4118	0.00914889	0.00163238	2.1e-08	0.01298	0.00775	0.09395
rs10765776	A	C	0.390712	0.000109047	47.7553	-0.0113225	0.00163844	4.8e-12	-0.009547	0.007841	0.223379
rs111901094	T	G	0.182164	8.38509e-05	36.7201	0.0127107	0.00209757	1.4e-09	0.032442	0.0148	0.028403
rs11191129	T	C	0.422818	8.55543e-05	37.4661	-0.00984638	0.00160863	9.3e-10	-0.00409	0.007678	0.594297
rs11222919	G	T	0.175374	7.70684e-05	33.7497	-0.0122141	0.00210245	6.3e-09	-0.018551	0.010432	0.075372
rs11245482	C	T	0.385493	8.85357e-05	38.7719	0.0101886	0.00163627	4.8e-10	0.002245	0.007835	0.774466
rs114755463	A	G	0.16775	8.69933e-05	38.0964	0.0132589	0.00214815	6.7e-10	0.018075	0.010143	0.074745
rs115608101	T	C	0.130399	7.444e-05	32.5986	-0.0135365	0.00237086	1.1e-08	-0.013408	0.011525	0.244645
rs11662211	T	C	0.505628	8.04767e-05	35.2424	-0.00944795	0.00159149	2.9e-09	-2.3e-05	0.0079	0.997628
rs11680095	T	C	0.592713	7.22033e-05	31.619	-0.00918965	0.00163427	1.9e-08	-0.006593	0.007845	0.40068
rs11696187	T	C	0.160229	8.91231e-05	39.0292	-0.0135653	0.00217137	4.2e-10	-0.009143	0.01059	0.387973
rs11700249	G	T	0.408795	7.73204e-05	33.8601	0.00943299	0.00162108	5.9e-09	0.006237	0.00785	0.426873
rs11714337	A	G	0.430094	8.64418e-05	37.8549	-0.00991351	0.00161126	7.6e-10	-0.002468	0.007746	0.750063
rs12045585	A	G	0.131234	8.92123e-05	39.0682	-0.0150612	0.00240961	4.1e-10	-0.008355	0.011412	0.464139
rs12214364	G	T	0.415458	6.90405e-05	30.2339	0.00904588	0.00164514	3.8e-08	-0.004837	0.00814	0.552366
rs1291871	C	T	0.514085	7.50404e-05	32.8615	0.00916233	0.00159831	9.9e-09	0.00128	0.007595	0.866117
rs13014947	A	G	0.574722	9.74196e-05	42.6628	0.0106072	0.00162396	6.5e-11	0.007083	0.007876	0.368467
rs13107325	T	C	0.075099	0.000103501	45.3264	0.0203199	0.00301818	1.7e-11	0.003568	0.016374	0.827479
rs1344707	A	G	0.748938	8.32781e-05	36.4693	-0.0110644	0.00183216	1.6e-09	-0.014181	0.008825	0.108056
rs1727332	T	C	0.753551	0.000115544	50.601	0.0131505	0.00184868	1.1e-12	0.018663	0.008927	0.036577
rs17789218	C	T	0.243949	7.95696e-05	34.8451	-0.0109161	0.00184925	3.6e-09	-0.016887	0.009536	0.076577
rs178203	C	T	0.749551	9.78352e-05	42.8448	0.012014	0.00183543	5.9e-11	-0.004404	0.008871	0.619561
rs180396	T	C	0.746657	6.85231e-05	30.0073	0.0100502	0.00183468	4.3e-08	0.007293	0.008845	0.409642
rs1826510	A	G	0.828498	7.22076e-05	31.6209	-0.0127337	0.00226447	1.9e-08	-0.001673	0.012745	0.895564
rs184332798	A	G	0.026113	7.03669e-05	30.8148	-0.0277737	0.00500326	2.8e-08	-0.012698	0.024945	0.610734
rs1993092	C	T	0.389657	7.77569e-05	34.0512	-0.00951741	0.00163099	5.4e-09	-0.019233	0.007762	0.01324
rs2073869	T	C	0.166613	9.50168e-05	41.6104	-0.0138006	0.00213942	1.1e-10	0.000965	0.009969	0.922895
rs2106164	C	T	0.531731	7.88115e-05	34.5131	-0.00938934	0.00159824	4.2e-09	-0.008035	0.00771	0.297325
rs2185490	C	A	0.617654	7.41479e-05	32.4707	0.00937259	0.0016448	1.2e-08	0.01676	0.007844	0.032647
rs2240857	G	T	0.141014	0.000109355	47.8902	0.0159314	0.00230213	4.5e-12	0.003038	0.010809	0.778656
rs2283	G	A	0.339277	6.98576e-05	30.5917	-0.00926961	0.00167594	3.2e-08	-0.018811	0.008132	0.02073
rs2352984	C	T	0.430943	0.000346323	151.702	0.0197571	0.00160408	7.4e-35	0.015671	0.00766	0.040795
rs2479968	G	A	0.05112	7.06123e-05	30.9222	0.0205886	0.00370246	2.7e-08	-0.006194	0.017513	0.723604
rs249960	G	A	0.182119	7.45177e-05	32.6326	-0.0118041	0.00206636	1.1e-08	-0.005889	0.009786	0.547312
rs262890	G	A	0.298989	0.000132533	58.0419	0.0132392	0.00173776	2.6e-14	0.011586	0.008233	0.159306
rs2646351	A	G	0.452916	7.10212e-05	31.1013	0.00891407	0.0015984	2.4e-08	0.016356	0.007647	0.032479
rs2678662	G	T	0.608337	0.000106456	46.6206	0.0111458	0.00163238	8.6e-12	0.006267	0.007731	0.417561
rs2725371	G	A	0.695652	0.00013353	58.4786	-0.0132649	0.00173462	2.1e-14	-0.021355	0.008296	0.010072
rs2857693	T	G	0.365548	9.56927e-05	41.9064	0.0106577	0.00164635	9.6e-11	0.009555	0.00883	0.279168
rs3138499	C	A	0.518183	0.000106542	46.6581	0.0109638	0.00160508	8.5e-12	0.006679	0.007592	0.37899
rs34094119	G	A	0.525005	7.39449e-05	32.3818	0.00908177	0.00159595	1.3e-08	0.002523	0.007639	0.741167
rs34811474	A	G	0.230691	0.000110972	48.5982	-0.0131563	0.00188722	3.1e-12	0.007689	0.010892	0.480248
rs35797019	G	A	0.392335	7.31641e-05	32.0398	-0.00921437	0.00162787	1.5e-08	0.005765	0.007733	0.455946
rs362312	C	T	0.424168	7.96777e-05	34.8924	-0.00952438	0.00161239	3.5e-09	-0.009549	0.00777	0.219106
rs3754970	C	T	0.502922	8.40975e-05	36.8281	0.00970162	0.00159865	1.3e-09	-0.002975	0.007622	0.69633
rs3810496	C	T	0.61619	7.41749e-05	32.4825	0.00937122	0.00164426	1.2e-08	0.010863	0.008115	0.180691
rs4076457	T	C	0.256946	6.9188e-05	30.2985	-0.0100378	0.00182359	3.7e-08	0.004184	0.008809	0.634826
rs4110177	A	G	0.367281	7.39289e-05	32.3748	0.00942719	0.00165683	1.3e-08	0.001092	0.007963	0.890942
rs4303732	C	T	0.40162	9.99689e-05	43.7793	-0.0107277	0.00162133	3.7e-11	0.007082	0.007721	0.359035
rs4469687	G	A	0.483936	6.99239e-05	30.6208	0.00879878	0.00159006	3.1e-08	0.006983	0.007564	0.355883
rs4567133	A	C	0.810356	9.32152e-05	40.8214	-0.0130235	0.00203837	1.7e-10	-0.000565	0.009478	0.952411
rs4747438	T	C	0.676512	0.000109953	48.1523	-0.0118194	0.00170328	3.9e-12	-0.014679	0.008272	0.075977
rs494566	T	C	0.332086	8.2046e-05	35.9297	0.0101656	0.00169592	2e-09	-0.001251	0.008243	0.879369
rs57555420	T	C	0.281686	7.52579e-05	32.9568	0.0101749	0.00177238	9.4e-09	-0.006302	0.008659	0.46676
rs58541850	A	G	0.058526	9.10467e-05	39.8716	0.0213895	0.00338741	2.7e-10	0.031531	0.01868	0.091422
rs6102912	C	T	0.41003	0.000104132	45.6026	-0.0109087	0.00161539	1.4e-11	-0.003667	0.007621	0.630401
rs6125907	A	C	0.092033	7.85106e-05	34.3813	0.0161817	0.0027597	4.5e-09	0.002557	0.013637	0.851246
rs61743199	G	A	0.071839	7.27847e-05	31.8736	0.0173842	0.0030792	1.6e-08	0.040736	0.01803	0.023883
rs61864793	C	T	0.251695	8.42482e-05	36.8941	-0.0111416	0.00183429	1.2e-09	0.004197	0.008955	0.639357
rs62145951	C	T	0.263053	0.000101461	44.4327	-0.0120253	0.00180403	2.6e-11	0.008728	0.008756	0.31882
rs6511708	C	T	0.664796	0.000117392	51.4102	-0.0120822	0.00168508	7.5e-13	0.001857	0.0082	0.82086
rs68056254	T	G	0.150874	8.40143e-05	36.7917	0.0134953	0.00222488	1.3e-09	0.011172	0.010456	0.285313
rs6814554	A	G	0.47436	0.000163994	71.8223	0.0135276	0.00159621	2.4e-17	0.017271	0.007633	0.023678
rs6850494	C	A	0.386016	7.97815e-05	34.9379	0.00966003	0.00163429	3.4e-09	-0.008564	0.007964	0.282171
rs6994132	C	T	0.579236	8.73437e-05	38.2498	-0.00996299	0.00161092	6.2e-10	-0.010602	0.007714	0.169324
rs7089973	A	C	0.380267	7.28259e-05	31.8917	0.00929464	0.00164586	1.6e-08	0.008158	0.007957	0.305219
rs7184800	A	G	0.302842	0.00013809	60.4758	-0.0134542	0.00173008	7.4e-15	-0.003039	0.0083	0.714248
rs73571431	T	C	0.109769	8.79044e-05	38.4954	0.0158383	0.00255272	5.5e-10	0.010154	0.011958	0.395809
rs73946726	A	C	0.02024	7.15868e-05	31.3491	0.0319589	0.00570793	2.2e-08	0.001357	0.030489	0.964487
rs749056	G	T	0.304306	7.64559e-05	33.4815	-0.0100199	0.00173165	7.2e-09	-0.00972	0.008187	0.23511
rs749671	A	G	0.371805	0.000103641	45.3876	-0.0110813	0.00164483	1.6e-11	-0.000236	0.007873	0.97607
rs75499503	T	C	0.219683	0.000204265	89.4631	-0.0184284	0.00194834	3.1e-21	-0.020887	0.009188	0.023036
rs7708324	G	A	0.377232	8.31289e-05	36.4039	-0.00988735	0.00163872	1.6e-09	0.000638	0.007949	0.935981
rs7798292	A	G	0.43452	8.39511e-05	36.764	-0.00972203	0.00160341	1.3e-09	0.002513	0.007861	0.74924
rs78227853	T	C	0.024787	6.95397e-05	30.4525	-0.0283605	0.00513927	3.4e-08	0.034663	0.025029	0.166065
rs7921305	A	G	0.252545	8.96428e-05	39.2568	-0.0114732	0.00183116	3.7e-10	-0.007442	0.00991	0.452679
rs79373894	C	T	0.034386	9.55913e-05	41.862	-0.0287273	0.00444001	9.8e-11	0.02961	0.025876	0.252465
rs801733	C	A	0.357688	0.000129522	56.723	-0.0124933	0.00165881	5e-14	0.001655	0.007967	0.835444
rs814197	G	T	0.466816	0.000102637	44.948	-0.0106837	0.00159355	2e-11	-0.00761	0.007608	0.317152
rs898751	T	C	0.493393	9.05733e-05	39.6643	0.0100214	0.00159121	3e-10	0.014948	0.007688	0.051861
rs9300594	G	A	0.253582	8.56416e-05	37.5044	0.0112022	0.0018292	9.1e-10	-0.00714	0.00862	0.407475
rs9471333	T	C	0.552259	9.72578e-05	42.5919	-0.0104272	0.00159773	6.7e-11	0.008378	0.007604	0.270514
rs9834970	C	T	0.497804	7.19104e-05	31.4908	-0.0089082	0.00158744	2e-08	-0.000814	0.007611	0.914773
rs9867121	A	C	0.184147	7.36197e-05	32.2393	-0.0116984	0.00206031	1.4e-08	-0.021313	0.010047	0.033909
rs9880023	T	G	0.556427	8.21924e-05	35.9938	0.00964695	0.00160796	2e-09	0.004805	0.007744	0.534952
rs996234	A	G	0.516342	9.34307e-05	40.9157	-0.0105421	0.00164809	1.6e-10	-0.001356	0.007643	0.859135
SNP	EA	OA	Eaf	R2	FSTAT	Exposure			Migraine with aura
									GWAS from FinnGen
						Beta	Se	P-value	Beta	Se	P-value
rs10189857	G	A	0.432324	0.00019115	83.7179	0.0146862	0.00160509	5.7e-20	0.00619891	0.0154367	0.688001
rs10269099	T	G	0.391234	7.173e-05	31.4118	0.00914889	0.00163238	2.1e-08	0.0157252	0.0155596	0.312186
rs10765776	A	C	0.390712	0.000109047	47.7553	-0.0113225	0.00163844	4.8e-12	-0.00742996	0.0174234	0.669791
rs11191129	T	C	0.422818	8.55543e-05	37.4661	-0.00984638	0.00160863	9.3e-10	-0.00821495	0.0155494	0.597281
rs11222919	G	T	0.175374	7.70684e-05	33.7497	-0.0122141	0.00210245	6.3e-09	-0.010342	0.024264	0.66994
rs11245482	C	T	0.385493	8.85357e-05	38.7719	0.0101886	0.00163627	4.8e-10	-0.000956715	0.0160092	0.952347
rs114755463	A	G	0.16775	8.69933e-05	38.0964	0.0132589	0.00214815	6.7e-10	0.026589	0.0216873	0.220193
rs115608101	T	C	0.130399	7.444e-05	32.5986	-0.0135365	0.00237086	1.1e-08	-0.0109505	0.0315637	0.728642
rs11662211	T	C	0.505628	8.04767e-05	35.2424	-0.00944795	0.00159149	2.9e-09	0.0142162	0.0157498	0.366725
rs11680095	T	C	0.592713	7.22033e-05	31.619	-0.00918965	0.00163427	1.9e-08	-0.012179	0.0158206	0.441406
rs11696187	T	C	0.160229	8.91231e-05	39.0292	-0.0135653	0.00217137	4.2e-10	-0.0155889	0.0181588	0.39063
rs11700249	G	T	0.408795	7.73204e-05	33.8601	0.00943299	0.00162108	5.9e-09	-0.0101415	0.0156869	0.51796
rs12045585	A	G	0.131234	8.92123e-05	39.0682	-0.0150612	0.00240961	4.1e-10	0.000403167	0.0222005	0.985511
rs12214364	G	T	0.415458	6.90405e-05	30.2339	0.00904588	0.00164514	3.8e-08	0.0212273	0.0159173	0.182334
rs1291871	C	T	0.514085	7.50404e-05	32.8615	0.00916233	0.00159831	9.9e-09	-0.0125492	0.0155476	0.419583
rs13014947	A	G	0.574722	9.74196e-05	42.6628	0.0106072	0.00162396	6.5e-11	0.0026564	0.0160693	0.8687
rs13107325	T	C	0.075099	0.000103501	45.3264	0.0203199	0.00301818	1.7e-11	0.060742	0.067111	0.365413
rs1324491	A	G	0.130982	7.39171e-05	32.3696	0.0134128	0.00235749	1.3e-08	-0.019932	0.0225346	0.376423
rs1344707	A	G	0.748938	8.32781e-05	36.4693	-0.0110644	0.00183216	1.6e-09	-0.0075705	0.0169211	0.654586
rs17789218	C	T	0.243949	7.95696e-05	34.8451	-0.0109161	0.00184925	3.6e-09	0.0232858	0.0189089	0.218147
rs178203	C	T	0.749551	9.78352e-05	42.8448	0.012014	0.00183543	5.9e-11	-0.0251337	0.0191405	0.189144
rs1826510	A	G	0.828498	7.22076e-05	31.6209	-0.0127337	0.00226447	1.9e-08	-0.0363409	0.0187835	0.0530237
rs1993092	C	T	0.389657	7.77569e-05	34.0512	-0.00951741	0.00163099	5.4e-09	0.00507047	0.0155932	0.745051
rs2073869	T	C	0.166613	9.50168e-05	41.6104	-0.0138006	0.00213942	1.1e-10	-0.0232033	0.0171893	0.177058
rs2106164	C	T	0.531731	7.88115e-05	34.5131	-0.00938934	0.00159824	4.2e-09	0.0107544	0.0154202	0.485538
rs2185490	C	A	0.617654	7.41479e-05	32.4707	0.00937259	0.0016448	1.2e-08	0.00887616	0.0157115	0.572109
rs2240857	G	T	0.141014	0.000109355	47.8902	0.0159314	0.00230213	4.5e-12	0.0106904	0.0188655	0.570943
rs2283	G	A	0.339277	6.98576e-05	30.5917	-0.00926961	0.00167594	3.2e-08	0.0137849	0.0180793	0.44578
rs2352984	C	T	0.430943	0.000346323	151.702	0.0197571	0.00160408	7.4e-35	-0.00253241	0.0163468	0.876886
rs2479968	G	A	0.05112	7.06123e-05	30.9222	0.0205886	0.00370246	2.7e-08	0.0114334	0.0251116	0.648891
rs249960	G	A	0.182119	7.45177e-05	32.6326	-0.0118041	0.00206636	1.1e-08	-0.0240829	0.0198811	0.225762
rs262890	G	A	0.298989	0.000132533	58.0419	0.0132392	0.00173776	2.6e-14	-0.0114726	0.0158175	0.468262
rs2646351	A	G	0.452916	7.10212e-05	31.1013	0.00891407	0.0015984	2.4e-08	-0.0134207	0.0155758	0.388886
rs2725371	G	A	0.695652	0.00013353	58.4786	-0.0132649	0.00173462	2.1e-14	0.0259753	0.0176064	0.140122
rs2857693	T	G	0.365548	9.56927e-05	41.9064	0.0106577	0.00164635	9.6e-11	0.00196108	0.0164728	0.905236
rs2906604	C	T	0.497337	9.81754e-05	42.9937	0.0104012	0.00158628	5.5e-11	0.0240364	0.015449	0.119744
rs3138499	C	A	0.518183	0.000106542	46.6581	0.0109638	0.00160508	8.5e-12	-0.010512	0.015376	0.494186
rs34811474	A	G	0.230691	0.000110972	48.5982	-0.0131563	0.00188722	3.1e-12	-0.0130113	0.0183982	0.479437
rs362312	C	T	0.424168	7.96777e-05	34.8924	-0.00952438	0.00161239	3.5e-09	0.00928421	0.0155162	0.549602
rs3754970	C	T	0.502922	8.40975e-05	36.8281	0.00970162	0.00159865	1.3e-09	-0.00606912	0.0155509	0.696335
rs3810496	C	T	0.61619	7.41749e-05	32.4825	0.00937122	0.00164426	1.2e-08	0.00371867	0.0157672	0.813551
rs4076457	T	C	0.256946	6.9188e-05	30.2985	-0.0100378	0.00182359	3.7e-08	-0.00944986	0.0188304	0.615779
rs4339469	G	T	0.62921	0.000132119	57.8605	0.0125288	0.00164709	2.8e-14	0.0167301	0.0166071	0.313741
rs4469687	G	A	0.483936	6.99239e-05	30.6208	0.00879878	0.00159006	3.1e-08	-0.00804965	0.0153697	0.600464
rs4567133	A	C	0.810356	9.32152e-05	40.8214	-0.0130235	0.00203837	1.7e-10	-0.0110203	0.0170492	0.518031
rs4747438	T	C	0.676512	0.000109953	48.1523	-0.0118194	0.00170328	3.9e-12	-0.0114227	0.0160959	0.477912
rs4788616	G	T	0.391065	8.90145e-05	38.9816	-0.0101834	0.00163103	4.3e-10	0.0283377	0.0155018	0.0675445
rs494566	T	C	0.332086	8.2046e-05	35.9297	0.0101656	0.00169592	2e-09	0.0342149	0.0177552	0.0539759
rs57555420	T	C	0.281686	7.52579e-05	32.9568	0.0101749	0.00177238	9.4e-09	0.0089391	0.0188714	0.635725
rs6102912	C	T	0.41003	0.000104132	45.6026	-0.0109087	0.00161539	1.4e-11	-0.0295925	0.0154114	0.0548365
rs61743199	G	A	0.071839	7.27847e-05	31.8736	0.0173842	0.0030792	1.6e-08	0.0459048	0.0354629	0.195511
rs61864793	C	T	0.251695	8.42482e-05	36.8941	-0.0111416	0.00183429	1.2e-09	0.00423014	0.0192003	0.825625
rs62145951	C	T	0.263053	0.000101461	44.4327	-0.0120253	0.00180403	2.6e-11	0.0294532	0.0156516	0.0598632
rs62199883	A	C	0.48612	0.000173002	75.7681	0.0138426	0.00159028	3.2e-18	0.00320422	0.0156202	0.837468
rs6511708	C	T	0.664796	0.000117392	51.4102	-0.0120822	0.00168508	7.5e-13	0.0226229	0.017257	0.189877
rs68056254	T	G	0.150874	8.40143e-05	36.7917	0.0134953	0.00222488	1.3e-09	-0.0233986	0.0202983	0.249019
rs6850494	C	A	0.386016	7.97815e-05	34.9379	0.00966003	0.00163429	3.4e-09	-0.00143353	0.0156482	0.927008
rs6895658	C	T	0.193239	9.49545e-05	41.5831	-0.0129815	0.0020131	1.1e-10	0.0365796	0.0199776	0.067095
rs6994132	C	T	0.579236	8.73437e-05	38.2498	-0.00996299	0.00161092	6.2e-10	0.0126022	0.015661	0.421003
rs7089973	A	C	0.380267	7.28259e-05	31.8917	0.00929464	0.00164586	1.6e-08	-0.0191938	0.0159471	0.228747
rs7184800	A	G	0.302842	0.00013809	60.4758	-0.0134542	0.00173008	7.4e-15	-0.0192185	0.0176698	0.276751
rs73571431	T	C	0.109769	8.79044e-05	38.4954	0.0158383	0.00255272	5.5e-10	0.011332	0.0200769	0.572461
rs73946726	A	C	0.02024	7.15868e-05	31.3491	0.0319589	0.00570793	2.2e-08	0.0493119	0.116083	0.670982
rs749056	G	T	0.304306	7.64559e-05	33.4815	-0.0100199	0.00173165	7.2e-09	-0.0211218	0.016313	0.195395
rs749671	A	G	0.371805	0.000103641	45.3876	-0.0110813	0.00164483	1.6e-11	0.0181958	0.0158304	0.250384
rs75641275	C	A	0.14333	0.000105584	46.2387	0.0154331	0.0022696	1e-11	-0.0275934	0.0183845	0.13338
rs7708324	G	A	0.377232	8.31289e-05	36.4039	-0.00988735	0.00163872	1.6e-09	0.00826832	0.0164576	0.615385
rs7798292	A	G	0.43452	8.39511e-05	36.764	-0.00972203	0.00160341	1.3e-09	0.00542941	0.0157515	0.730325
rs7899206	G	T	0.492382	8.41524e-05	36.8522	-0.00977557	0.00161031	1.3e-09	-0.00626802	0.0156998	0.689714
rs7921305	A	G	0.252545	8.96428e-05	39.2568	-0.0114732	0.00183116	3.7e-10	-0.0106333	0.0182297	0.559693
rs79373894	C	T	0.034386	9.55913e-05	41.862	-0.0287273	0.00444001	9.8e-11	-0.0392552	0.109456	0.719867
rs801733	C	A	0.357688	0.000129522	56.723	-0.0124933	0.00165881	5e-14	0.00556429	0.0166194	0.737772
rs814197	G	T	0.466816	0.000102637	44.948	-0.0106837	0.00159355	2e-11	0.0250484	0.0156246	0.108904
rs898751	T	C	0.493393	9.05733e-05	39.6643	0.0100214	0.00159121	3e-10	-0.00349558	0.0154331	0.820814
rs9300594	G	A	0.253582	8.56416e-05	37.5044	0.0112022	0.0018292	9.1e-10	-0.00154572	0.0158928	0.922521
rs9471333	T	C	0.552259	9.72578e-05	42.5919	-0.0104272	0.00159773	6.7e-11	-0.00477448	0.0156858	0.760838
rs9834970	C	T	0.497804	7.19104e-05	31.4908	-0.0089082	0.00158744	2e-08	0.0265247	0.0157224	0.0915904
rs9867121	A	C	0.184147	7.36197e-05	32.2393	-0.0116984	0.00206031	1.4e-08	-0.0191309	0.0205555	0.352012
rs9867437	C	A	0.460371	9.44586e-05	41.3659	-0.0103044	0.00160214	1.3e-10	-0.00918008	0.0154425	0.552199
rs9880023	T	G	0.556427	8.21924e-05	35.9938	0.00964695	0.00160796	2e-09	-0.00572095	0.0160953	0.722259
rs996234	A	G	0.516342	9.34307e-05	40.9157	-0.0105421	0.00164809	1.6e-10	0.00629713	0.0154982	0.684512
SNP	EA	OA	Eaf	R2	FSTAT	Exposure			Migraine with aura
									GWAS from IHGC
						Beta	Se	P-value	Beta	Se	P-value
rs10109061	G	A	0.443183	7.00412e-05	30.6721	-0.00896843	0.00161936	3.1e-08	0.01243	0.024023	0.604894
rs10189857	G	A	0.432324	0.00019115	83.7179	0.0146862	0.00160509	5.7e-20	0.013555	0.021151	0.52162
rs10269099	T	G	0.391234	7.173e-05	31.4118	0.00914889	0.00163238	2.1e-08	0.005183	0.021784	0.811934
rs10765776	A	C	0.390712	0.000109047	47.7553	-0.0113225	0.00163844	4.8e-12	0.008855	0.02174	0.68379
rs11191129	T	C	0.422818	8.55543e-05	37.4661	-0.00984638	0.00160863	9.3e-10	-0.006025	0.021601	0.780302
rs11222919	G	T	0.175374	7.70684e-05	33.7497	-0.0122141	0.00210245	6.3e-09	0.008861	0.030157	0.768883
rs11245482	C	T	0.385493	8.85357e-05	38.7719	0.0101886	0.00163627	4.8e-10	0.024173	0.022165	0.275424
rs114755463	A	G	0.16775	8.69933e-05	38.0964	0.0132589	0.00214815	6.7e-10	0.007521	0.028872	0.794487
rs115608101	T	C	0.130399	7.444e-05	32.5986	-0.0135365	0.00237086	1.1e-08	-0.014594	0.032457	0.652979
rs11662211	T	C	0.505628	8.04767e-05	35.2424	-0.00944795	0.00159149	2.9e-09	-0.002029	0.023297	0.930579
rs11680095	T	C	0.592713	7.22033e-05	31.619	-0.00918965	0.00163427	1.9e-08	0.002347	0.022034	0.915144
rs11696187	T	C	0.160229	8.91231e-05	39.0292	-0.0135653	0.00217137	4.2e-10	0.025949	0.031057	0.403414
rs11700249	G	T	0.408795	7.73204e-05	33.8601	0.00943299	0.00162108	5.9e-09	-0.023712	0.021919	0.279325
rs11714337	A	G	0.430094	8.64418e-05	37.8549	-0.00991351	0.00161126	7.6e-10	0.028237	0.021977	0.198821
rs11877758	G	T	0.312562	9.42731e-05	41.2847	0.0110747	0.0017236	1.3e-10	0.035855	0.022792	0.11569
rs11911112	C	A	0.365887	9.64713e-05	42.2474	-0.0107427	0.00165277	8e-11	0.043596	0.022334	0.050955
rs12045585	A	G	0.131234	8.92123e-05	39.0682	-0.0150612	0.00240961	4.1e-10	0.024698	0.031166	0.428089
rs12214364	G	T	0.415458	6.90405e-05	30.2339	0.00904588	0.00164514	3.8e-08	-0.009053	0.023109	0.69527
rs1291871	C	T	0.514085	7.50404e-05	32.8615	0.00916233	0.00159831	9.9e-09	-0.014383	0.021455	0.502634
rs13014947	A	G	0.574722	9.74196e-05	42.6628	0.0106072	0.00162396	6.5e-11	-0.015582	0.021753	0.473827
rs13107325	T	C	0.075099	0.000103501	45.3264	0.0203199	0.00301818	1.7e-11	0.015139	0.051737	0.769827
rs1324491	A	G	0.130982	7.39171e-05	32.3696	0.0134128	0.00235749	1.3e-08	-0.040015	0.031675	0.206468
rs1344707	A	G	0.748938	8.32781e-05	36.4693	-0.0110644	0.00183216	1.6e-09	-0.021551	0.026596	0.417762
rs1727332	T	C	0.753551	0.000115544	50.601	0.0131505	0.00184868	1.1e-12	0.022425	0.024715	0.36422
rs17789218	C	T	0.243949	7.95696e-05	34.8451	-0.0109161	0.00184925	3.6e-09	-0.036716	0.027267	0.17812
rs178203	C	T	0.749551	9.78352e-05	42.8448	0.012014	0.00183543	5.9e-11	0.002809	0.02458	0.908991
rs180396	T	C	0.746657	6.85231e-05	30.0073	0.0100502	0.00183468	4.3e-08	0.009831	0.024521	0.688495
rs1826510	A	G	0.828498	7.22076e-05	31.6209	-0.0127337	0.00226447	1.9e-08	-0.040667	0.043152	0.345974
rs184332798	A	G	0.026113	7.03669e-05	30.8148	-0.0277737	0.00500326	2.8e-08	-0.010112	0.070177	0.88541
rs1993092	C	T	0.389657	7.77569e-05	34.0512	-0.00951741	0.00163099	5.4e-09	-0.015898	0.021482	0.459269
rs2073869	T	C	0.166613	9.50168e-05	41.6104	-0.0138006	0.00213942	1.1e-10	0.002179	0.027542	0.936922
rs2106164	C	T	0.531731	7.88115e-05	34.5131	-0.00938934	0.00159824	4.2e-09	-0.000603	0.022093	0.978226
rs2185490	C	A	0.617654	7.41479e-05	32.4707	0.00937259	0.0016448	1.2e-08	0.009752	0.021724	0.65352
rs2240857	G	T	0.141014	0.000109355	47.8902	0.0159314	0.00230213	4.5e-12	0.00431	0.030469	0.887483
rs2283	G	A	0.339277	6.98576e-05	30.5917	-0.00926961	0.00167594	3.2e-08	-0.018873	0.023145	0.414832
rs2352984	C	T	0.430943	0.000346323	151.702	0.0197571	0.00160408	7.4e-35	0.027693	0.021624	0.2003
rs2479968	G	A	0.05112	7.06123e-05	30.9222	0.0205886	0.00370246	2.7e-08	0.047134	0.054517	0.387267
rs249960	G	A	0.182119	7.45177e-05	32.6326	-0.0118041	0.00206636	1.1e-08	-0.023861	0.027686	0.388758
rs262890	G	A	0.298989	0.000132533	58.0419	0.0132392	0.00173776	2.6e-14	0.002859	0.023313	0.902377
rs2646351	A	G	0.452916	7.10212e-05	31.1013	0.00891407	0.0015984	2.4e-08	0.003145	0.021662	0.884534
rs2678662	G	T	0.608337	0.000106456	46.6206	0.0111458	0.00163238	8.6e-12	0.021676	0.021338	0.309679
rs2725371	G	A	0.695652	0.00013353	58.4786	-0.0132649	0.00173462	2.1e-14	-0.034753	0.023316	0.136077
rs2906604	C	T	0.497337	9.81754e-05	42.9937	0.0104012	0.00158628	5.5e-11	0.025205	0.021116	0.232592
rs3138499	C	A	0.518183	0.000106542	46.6581	0.0109638	0.00160508	8.5e-12	-0.012263	0.021334	0.565446
rs34094119	G	A	0.525005	7.39449e-05	32.3818	0.00908177	0.00159595	1.3e-08	-0.021945	0.02152	0.307819
rs34811474	A	G	0.230691	0.000110972	48.5982	-0.0131563	0.00188722	3.1e-12	0.067931	0.037509	0.070137
rs35797019	G	A	0.392335	7.31641e-05	32.0398	-0.00921437	0.00162787	1.5e-08	0.027661	0.021825	0.204999
rs362312	C	T	0.424168	7.96777e-05	34.8924	-0.00952438	0.00161239	3.5e-09	0.031096	0.021962	0.156797
rs3754970	C	T	0.502922	8.40975e-05	36.8281	0.00970162	0.00159865	1.3e-09	0.030352	0.021082	0.149925
rs3810496	C	T	0.61619	7.41749e-05	32.4825	0.00937122	0.00164426	1.2e-08	-0.001537	0.024085	0.949098
rs4076457	T	C	0.256946	6.9188e-05	30.2985	-0.0100378	0.00182359	3.7e-08	0.025492	0.024857	0.305097
rs4110177	A	G	0.367281	7.39289e-05	32.3748	0.00942719	0.00165683	1.3e-08	-0.001372	0.022676	0.951733
rs4303732	C	T	0.40162	9.99689e-05	43.7793	-0.0107277	0.00162133	3.7e-11	0.025769	0.021243	0.225071
rs4339469	G	T	0.62921	0.000132119	57.8605	0.0125288	0.00164709	2.8e-14	0.031129	0.02227	0.162157
rs4469687	G	A	0.483936	6.99239e-05	30.6208	0.00879878	0.00159006	3.1e-08	0.04599	0.020966	0.02829
rs4567133	A	C	0.810356	9.32152e-05	40.8214	-0.0130235	0.00203837	1.7e-10	0.022981	0.026949	0.393786
rs4747438	T	C	0.676512	0.000109953	48.1523	-0.0118194	0.00170328	3.9e-12	-0.015872	0.023935	0.507261
rs4788616	G	T	0.391065	8.90145e-05	38.9816	-0.0101834	0.00163103	4.3e-10	0.035287	0.021392	0.099033
rs494566	T	C	0.332086	8.2046e-05	35.9297	0.0101656	0.00169592	2e-09	0.02133	0.023561	0.365301
rs57555420	T	C	0.281686	7.52579e-05	32.9568	0.0101749	0.00177238	9.4e-09	0.012471	0.024456	0.610102
rs58541850	A	G	0.058526	9.10467e-05	39.8716	0.0213895	0.00338741	2.7e-10	0.016659	0.059246	0.778578
rs6102912	C	T	0.41003	0.000104132	45.6026	-0.0109087	0.00161539	1.4e-11	-0.014055	0.02104	0.504147
rs6125907	A	C	0.092033	7.85106e-05	34.3813	0.0161817	0.0027597	4.5e-09	0.033112	0.037557	0.37797
rs61743199	G	A	0.071839	7.27847e-05	31.8736	0.0173842	0.0030792	1.6e-08	0.014013	0.061731	0.820412
rs61864793	C	T	0.251695	8.42482e-05	36.8941	-0.0111416	0.00183429	1.2e-09	0.021347	0.025763	0.407329
rs62145951	C	T	0.263053	0.000101461	44.4327	-0.0120253	0.00180403	2.6e-11	0.003454	0.024364	0.887244
rs62199883	A	C	0.48612	0.000173002	75.7681	0.0138426	0.00159028	3.2e-18	-0.003757	0.021209	0.859389
rs6511708	C	T	0.664796	0.000117392	51.4102	-0.0120822	0.00168508	7.5e-13	-0.009882	0.022901	0.666134
rs68056254	T	G	0.150874	8.40143e-05	36.7917	0.0134953	0.00222488	1.3e-09	-0.015926	0.028908	0.581705
rs6814554	A	G	0.47436	0.000163994	71.8223	0.0135276	0.00159621	2.4e-17	0.039496	0.021788	0.069875
rs6850494	C	A	0.386016	7.97815e-05	34.9379	0.00966003	0.00163429	3.4e-09	-0.004377	0.022773	0.847572
rs6895658	C	T	0.193239	9.49545e-05	41.5831	-0.0129815	0.0020131	1.1e-10	-0.012937	0.027397	0.636807
rs6994132	C	T	0.579236	8.73437e-05	38.2498	-0.00996299	0.00161092	6.2e-10	-0.028053	0.021983	0.201885
rs7089973	A	C	0.380267	7.28259e-05	31.8917	0.00929464	0.00164586	1.6e-08	0.016571	0.022612	0.463689
rs7184800	A	G	0.302842	0.00013809	60.4758	-0.0134542	0.00173008	7.4e-15	0.027647	0.022886	0.227009
rs73571431	T	C	0.109769	8.79044e-05	38.4954	0.0158383	0.00255272	5.5e-10	-0.03451	0.033774	0.306859
rs73946726	A	C	0.02024	7.15868e-05	31.3491	0.0319589	0.00570793	2.2e-08	0.093884	0.089764	0.295592
rs749056	G	T	0.304306	7.64559e-05	33.4815	-0.0100199	0.00173165	7.2e-09	-0.000668	0.022552	0.976366
rs749671	A	G	0.371805	0.000103641	45.3876	-0.0110813	0.00164483	1.6e-11	0.028847	0.021869	0.187116
rs7539775	A	G	0.743419	6.85178e-05	30.005	0.00996891	0.00181991	4.3e-08	-0.005739	0.024002	0.811032
rs75499503	T	C	0.219683	0.000204265	89.4631	-0.0184284	0.00194834	3.1e-21	-0.054505	0.025587	0.03318
rs75641275	C	A	0.14333	0.000105584	46.2387	0.0154331	0.0022696	1e-11	0.055119	0.028417	0.052434
rs7708324	G	A	0.377232	8.31289e-05	36.4039	-0.00988735	0.00163872	1.6e-09	0.006806	0.022246	0.759671
rs7798292	A	G	0.43452	8.39511e-05	36.764	-0.00972203	0.00160341	1.3e-09	-0.013174	0.021677	0.543359
rs78227853	T	C	0.024787	6.95397e-05	30.4525	-0.0283605	0.00513927	3.4e-08	-0.037602	0.075372	0.617883
rs7899206	G	T	0.492382	8.41524e-05	36.8522	-0.00977557	0.00161031	1.3e-09	0.033498	0.022534	0.13712
rs7921305	A	G	0.252545	8.96428e-05	39.2568	-0.0114732	0.00183116	3.7e-10	-0.040955	0.033112	0.216122
rs79373894	C	T	0.034386	9.55913e-05	41.862	-0.0287273	0.00444001	9.8e-11	0.160655	0.080685	0.046484
rs801733	C	A	0.357688	0.000129522	56.723	-0.0124933	0.00165881	5e-14	0.054611	0.022052	0.013289
rs814197	G	T	0.466816	0.000102637	44.948	-0.0106837	0.00159355	2e-11	-0.038935	0.021092	0.064907
rs898751	T	C	0.493393	9.05733e-05	39.6643	0.0100214	0.00159121	3e-10	0.009393	0.021424	0.661085
rs9300594	G	A	0.253582	8.56416e-05	37.5044	0.0112022	0.0018292	9.1e-10	-0.027957	0.023859	0.241268
rs9471333	T	C	0.552259	9.72578e-05	42.5919	-0.0104272	0.00159773	6.7e-11	0.011395	0.021093	0.589058
rs9834970	C	T	0.497804	7.19104e-05	31.4908	-0.0089082	0.00158744	2e-08	-0.017043	0.02145	0.426872
rs9867121	A	C	0.184147	7.36197e-05	32.2393	-0.0116984	0.00206031	1.4e-08	-0.022609	0.02897	0.435136
rs9867437	C	A	0.460371	9.44586e-05	41.3659	-0.0103044	0.00160214	1.3e-10	-0.012519	0.021524	0.56083
rs9880023	T	G	0.556427	8.21924e-05	35.9938	0.00964695	0.00160796	2e-09	0.020521	0.021984	0.350586
rs996234	A	G	0.516342	9.34307e-05	40.9157	-0.0105421	0.00164809	1.6e-10	-0.00916	0.021323	0.667517
SNP	EA	OA	Eaf	R2	FSTAT	Exposure			Migraine with no aura
									GWAS from FinnGen
						Beta	Se	P-value	Beta	Se	P-value
rs10109061	G	A	0.443183	7.00412e-05	30.6721	-0.00896843	0.00161936	3.1e-08	-0.024882	0.0178475	0.163274
rs10189857	G	A	0.432324	0.00019115	83.7179	0.0146862	0.00160509	5.7e-20	0.00682099	0.016813	0.684966
rs10269099	T	G	0.391234	7.173e-05	31.4118	0.00914889	0.00163238	2.1e-08	0.00145191	0.0169277	0.931648
rs10765776	A	C	0.390712	0.000109047	47.7553	-0.0113225	0.00163844	4.8e-12	0.00334283	0.0189561	0.860022
rs11191129	T	C	0.422818	8.55543e-05	37.4661	-0.00984638	0.00160863	9.3e-10	-0.00562214	0.0169197	0.739675
rs11222919	G	T	0.175374	7.70684e-05	33.7497	-0.0122141	0.00210245	6.3e-09	-0.0397877	0.0264322	0.132254
rs11245482	C	T	0.385493	8.85357e-05	38.7719	0.0101886	0.00163627	4.8e-10	-0.00899264	0.0174033	0.605351
rs114755463	A	G	0.16775	8.69933e-05	38.0964	0.0132589	0.00214815	6.7e-10	0.0225705	0.0236108	0.339103
rs115608101	T	C	0.130399	7.444e-05	32.5986	-0.0135365	0.00237086	1.1e-08	-0.0432052	0.0343138	0.207986
rs11662211	T	C	0.505628	8.04767e-05	35.2424	-0.00944795	0.00159149	2.9e-09	0.0143197	0.0171337	0.403289
rs11680095	T	C	0.592713	7.22033e-05	31.619	-0.00918965	0.00163427	1.9e-08	-0.011587	0.0172007	0.500544
rs11696187	T	C	0.160229	8.91231e-05	39.0292	-0.0135653	0.00217137	4.2e-10	-0.018124	0.0197316	0.358344
rs11700249	G	T	0.408795	7.73204e-05	33.8601	0.00943299	0.00162108	5.9e-09	-0.00438507	0.0170719	0.797288
rs11877758	G	T	0.312562	9.42731e-05	41.2847	0.0110747	0.0017236	1.3e-10	0.0348219	0.0192783	0.0708745
rs11911112	C	A	0.365887	9.64713e-05	42.2474	-0.0107427	0.00165277	8e-11	0.0220172	0.019875	0.267956
rs12045585	A	G	0.131234	8.92123e-05	39.0682	-0.0150612	0.00240961	4.1e-10	-0.000303512	0.0242026	0.989994
rs1291871	C	T	0.514085	7.50404e-05	32.8615	0.00916233	0.00159831	9.9e-09	0.0089214	0.0169217	0.598042
rs13014947	A	G	0.574722	9.74196e-05	42.6628	0.0106072	0.00162396	6.5e-11	0.0216787	0.0174656	0.214525
rs13107325	T	C	0.075099	0.000103501	45.3264	0.0203199	0.00301818	1.7e-11	0.0279771	0.0732088	0.702346
rs1324491	A	G	0.130982	7.39171e-05	32.3696	0.0134128	0.00235749	1.3e-08	0.0355984	0.0245233	0.146609
rs1344707	A	G	0.748938	8.32781e-05	36.4693	-0.0110644	0.00183216	1.6e-09	-0.0270578	0.0183825	0.141039
rs17789218	C	T	0.243949	7.95696e-05	34.8451	-0.0109161	0.00184925	3.6e-09	-0.0287839	0.0205672	0.161661
rs178203	C	T	0.749551	9.78352e-05	42.8448	0.012014	0.00183543	5.9e-11	-0.0114217	0.0208365	0.583582
rs180396	T	C	0.746657	6.85231e-05	30.0073	0.0100502	0.00183468	4.3e-08	0.0375164	0.0209932	0.0739248
rs1826510	A	G	0.828498	7.22076e-05	31.6209	-0.0127337	0.00226447	1.9e-08	-0.0369874	0.0204297	0.0702231
rs1993092	C	T	0.389657	7.77569e-05	34.0512	-0.00951741	0.00163099	5.4e-09	0.00767406	0.0169713	0.651141
rs2073869	T	C	0.166613	9.50168e-05	41.6104	-0.0138006	0.00213942	1.1e-10	0.0261086	0.0186874	0.162378
rs2106164	C	T	0.531731	7.88115e-05	34.5131	-0.00938934	0.00159824	4.2e-09	0.000995696	0.0167825	0.95269
rs2185490	C	A	0.617654	7.41479e-05	32.4707	0.00937259	0.0016448	1.2e-08	0.0182837	0.0170838	0.284514
rs2240857	G	T	0.141014	0.000109355	47.8902	0.0159314	0.00230213	4.5e-12	0.0161699	0.0205285	0.430885
rs2283	G	A	0.339277	6.98576e-05	30.5917	-0.00926961	0.00167594	3.2e-08	0.0121904	0.0196157	0.534294
rs2352984	C	T	0.430943	0.000346323	151.702	0.0197571	0.00160408	7.4e-35	0.0373977	0.017791	0.0355484
rs2479968	G	A	0.05112	7.06123e-05	30.9222	0.0205886	0.00370246	2.7e-08	-0.0268391	0.0272685	0.32499
rs249960	G	A	0.182119	7.45177e-05	32.6326	-0.0118041	0.00206636	1.1e-08	-0.0393948	0.021593	0.0680879
rs262890	G	A	0.298989	0.000132533	58.0419	0.0132392	0.00173776	2.6e-14	0.000955716	0.0172221	0.955745
rs2646351	A	G	0.452916	7.10212e-05	31.1013	0.00891407	0.0015984	2.4e-08	-0.000480699	0.016931	0.97735
rs2678662	G	T	0.608337	0.000106456	46.6206	0.0111458	0.00163238	8.6e-12	0.0306541	0.0171627	0.074085
rs2857693	T	G	0.365548	9.56927e-05	41.9064	0.0106577	0.00164635	9.6e-11	0.0419218	0.0178923	0.0191285
rs2906604	C	T	0.497337	9.81754e-05	42.9937	0.0104012	0.00158628	5.5e-11	0.0332402	0.0168179	0.0481005
rs3138499	C	A	0.518183	0.000106542	46.6581	0.0109638	0.00160508	8.5e-12	0.0141475	0.0167246	0.397603
rs34094119	G	A	0.525005	7.39449e-05	32.3818	0.00908177	0.00159595	1.3e-08	-0.0145347	0.0170055	0.392715
rs35797019	G	A	0.392335	7.31641e-05	32.0398	-0.00921437	0.00162787	1.5e-08	-0.0235435	0.016976	0.165481
rs362312	C	T	0.424168	7.96777e-05	34.8924	-0.00952438	0.00161239	3.5e-09	-0.027751	0.0168725	0.100023
rs3754970	C	T	0.502922	8.40975e-05	36.8281	0.00970162	0.00159865	1.3e-09	-0.00848349	0.0169079	0.615844
rs3810496	C	T	0.61619	7.41749e-05	32.4825	0.00937122	0.00164426	1.2e-08	0.0206954	0.0171533	0.227626
rs4076457	T	C	0.256946	6.9188e-05	30.2985	-0.0100378	0.00182359	3.7e-08	-0.0263552	0.0204503	0.197488
rs4110177	A	G	0.367281	7.39289e-05	32.3748	0.00942719	0.00165683	1.3e-08	-0.011676	0.0191971	0.543044
rs4303732	C	T	0.40162	9.99689e-05	43.7793	-0.0107277	0.00162133	3.7e-11	-0.00701152	0.0170284	0.680519
rs4339469	G	T	0.62921	0.000132119	57.8605	0.0125288	0.00164709	2.8e-14	-0.00665299	0.0180673	0.712699
rs4469687	G	A	0.483936	6.99239e-05	30.6208	0.00879878	0.00159006	3.1e-08	0.00675083	0.0167087	0.686191
rs4567133	A	C	0.810356	9.32152e-05	40.8214	-0.0130235	0.00203837	1.7e-10	0.00317539	0.018585	0.864336
rs4747438	T	C	0.676512	0.000109953	48.1523	-0.0118194	0.00170328	3.9e-12	-0.0210485	0.0175081	0.22928
rs4788616	G	T	0.391065	8.90145e-05	38.9816	-0.0101834	0.00163103	4.3e-10	0.00818546	0.016858	0.627284
rs494566	T	C	0.332086	8.2046e-05	35.9297	0.0101656	0.00169592	2e-09	0.0344045	0.0193152	0.0748773
rs57555420	T	C	0.281686	7.52579e-05	32.9568	0.0101749	0.00177238	9.4e-09	0.0226449	0.0205365	0.270173
rs6102912	C	T	0.41003	0.000104132	45.6026	-0.0109087	0.00161539	1.4e-11	-0.0310417	0.0167417	0.0637177
rs61743199	G	A	0.071839	7.27847e-05	31.8736	0.0173842	0.0030792	1.6e-08	-0.0215955	0.0384919	0.574771
rs61864793	C	T	0.251695	8.42482e-05	36.8941	-0.0111416	0.00183429	1.2e-09	0.00870019	0.0208685	0.676746
rs62145951	C	T	0.263053	0.000101461	44.4327	-0.0120253	0.00180403	2.6e-11	-0.00190936	0.0170388	0.910776
rs62199883	A	C	0.48612	0.000173002	75.7681	0.0138426	0.00159028	3.2e-18	0.00807698	0.0169973	0.63465
rs68056254	T	G	0.150874	8.40143e-05	36.7917	0.0134953	0.00222488	1.3e-09	-0.0132372	0.0220727	0.548699
rs6814554	A	G	0.47436	0.000163994	71.8223	0.0135276	0.00159621	2.4e-17	0.00538717	0.0168707	0.749483
rs6850494	C	A	0.386016	7.97815e-05	34.9379	0.00966003	0.00163429	3.4e-09	0.0391128	0.0170044	0.0214388
rs6895658	C	T	0.193239	9.49545e-05	41.5831	-0.0129815	0.0020131	1.1e-10	0.0136652	0.021694	0.528754
rs6994132	C	T	0.579236	8.73437e-05	38.2498	-0.00996299	0.00161092	6.2e-10	0.0180772	0.0170563	0.289211
rs7184800	A	G	0.302842	0.00013809	60.4758	-0.0134542	0.00173008	7.4e-15	-0.041471	0.0191973	0.0307532
rs73946726	A	C	0.02024	7.15868e-05	31.3491	0.0319589	0.00570793	2.2e-08	-0.142431	0.124418	0.252299
rs749056	G	T	0.304306	7.64559e-05	33.4815	-0.0100199	0.00173165	7.2e-09	-0.0227368	0.017769	0.200693
rs749671	A	G	0.371805	0.000103641	45.3876	-0.0110813	0.00164483	1.6e-11	-0.0253984	0.0172135	0.14008
rs75499503	T	C	0.219683	0.000204265	89.4631	-0.0184284	0.00194834	3.1e-21	-0.0460584	0.0199152	0.0207377
rs75641275	C	A	0.14333	0.000105584	46.2387	0.0154331	0.0022696	1e-11	0.00273613	0.0199957	0.891161
rs7708324	G	A	0.377232	8.31289e-05	36.4039	-0.00988735	0.00163872	1.6e-09	0.0193018	0.0178836	0.280454
rs7798292	A	G	0.43452	8.39511e-05	36.764	-0.00972203	0.00160341	1.3e-09	-0.0212429	0.0171345	0.215059
rs7899206	G	T	0.492382	8.41524e-05	36.8522	-0.00977557	0.00161031	1.3e-09	0.0160286	0.0170718	0.347785
rs7921305	A	G	0.252545	8.96428e-05	39.2568	-0.0114732	0.00183116	3.7e-10	0.0102088	0.0198537	0.607111
rs79373894	C	T	0.034386	9.55913e-05	41.862	-0.0287273	0.00444001	9.8e-11	0.0254416	0.11738	0.828407
rs801733	C	A	0.357688	0.000129522	56.723	-0.0124933	0.00165881	5e-14	0.000616075	0.0180789	0.972816
rs814197	G	T	0.466816	0.000102637	44.948	-0.0106837	0.00159355	2e-11	0.0123893	0.0169795	0.465596
rs898751	T	C	0.493393	9.05733e-05	39.6643	0.0100214	0.00159121	3e-10	0.0119034	0.0167904	0.478362
rs9471333	T	C	0.552259	9.72578e-05	42.5919	-0.0104272	0.00159773	6.7e-11	0.0158085	0.017055	0.353972
rs9834970	C	T	0.497804	7.19104e-05	31.4908	-0.0089082	0.00158744	2e-08	0.0226084	0.0171013	0.18616
rs9867121	A	C	0.184147	7.36197e-05	32.2393	-0.0116984	0.00206031	1.4e-08	0.00770163	0.0223932	0.7309
rs9867437	C	A	0.460371	9.44586e-05	41.3659	-0.0103044	0.00160214	1.3e-10	-0.00584932	0.016799	0.727694
rs9880023	T	G	0.556427	8.21924e-05	35.9938	0.00964695	0.00160796	2e-09	-0.00370797	0.0174957	0.832157
rs996234	A	G	0.516342	9.34307e-05	40.9157	-0.0105421	0.00164809	1.6e-10	0.0091911	0.0168562	0.585572
SNP	EA	OA	Eaf	R2	FSTAT	Exposure			Migraine with no aura
									GWAS from IHGC
						Beta	Se	P-value	Beta	Se	P-value
rs10109061	G	A	0.443183	7.00412e-05	30.6721	-0.00896843	0.00161936	3.1e-08	0.026563	0.02074	0.200265
rs10189857	G	A	0.432324	0.00019115	83.7179	0.0146862	0.00160509	5.7e-20	0.010724	0.019068	0.573854
rs10269099	T	G	0.391234	7.173e-05	31.4118	0.00914889	0.00163238	2.1e-08	0.00722	0.019398	0.709779
rs10765776	A	C	0.390712	0.000109047	47.7553	-0.0113225	0.00163844	4.8e-12	-0.016303	0.019538	0.404041
rs11191129	T	C	0.422818	8.55543e-05	37.4661	-0.00984638	0.00160863	9.3e-10	-0.023626	0.01926	0.219903
rs11222919	G	T	0.175374	7.70684e-05	33.7497	-0.0122141	0.00210245	6.3e-09	-0.044165	0.027217	0.104642
rs11245482	C	T	0.385493	8.85357e-05	38.7719	0.0101886	0.00163627	4.8e-10	-0.028147	0.019695	0.152937
rs114755463	A	G	0.16775	8.69933e-05	38.0964	0.0132589	0.00214815	6.7e-10	0.042907	0.025064	0.086915
rs115608101	T	C	0.130399	7.444e-05	32.5986	-0.0135365	0.00237086	1.1e-08	-0.046471	0.028481	0.102748
rs11662211	T	C	0.505628	8.04767e-05	35.2424	-0.00944795	0.00159149	2.9e-09	0.024994	0.02076	0.228593
rs11680095	T	C	0.592713	7.22033e-05	31.619	-0.00918965	0.00163427	1.9e-08	0.008857	0.019776	0.654279
rs11696187	T	C	0.160229	8.91231e-05	39.0292	-0.0135653	0.00217137	4.2e-10	0.022635	0.028039	0.419518
rs11700249	G	T	0.408795	7.73204e-05	33.8601	0.00943299	0.00162108	5.9e-09	0.029984	0.019849	0.130873
rs11714337	A	G	0.430094	8.64418e-05	37.8549	-0.00991351	0.00161126	7.6e-10	0.017771	0.019482	0.361679
rs11877758	G	T	0.312562	9.42731e-05	41.2847	0.0110747	0.0017236	1.3e-10	0.028942	0.020436	0.156699
rs11911112	C	A	0.365887	9.64713e-05	42.2474	-0.0107427	0.00165277	8e-11	0.014911	0.020114	0.458509
rs12045585	A	G	0.131234	8.92123e-05	39.0682	-0.0150612	0.00240961	4.1e-10	-0.022458	0.028653	0.433163
rs12214364	G	T	0.415458	6.90405e-05	30.2339	0.00904588	0.00164514	3.8e-08	-0.009835	0.020938	0.638574
rs1291871	C	T	0.514085	7.50404e-05	32.8615	0.00916233	0.00159831	9.9e-09	0.01303	0.018946	0.491644
rs13014947	A	G	0.574722	9.74196e-05	42.6628	0.0106072	0.00162396	6.5e-11	0.018898	0.019688	0.337104
rs13107325	T	C	0.075099	0.000103501	45.3264	0.0203199	0.00301818	1.7e-11	-0.015769	0.042586	0.71119
rs1344707	A	G	0.748938	8.32781e-05	36.4693	-0.0110644	0.00183216	1.6e-09	-0.016759	0.022116	0.448585
rs1727332	T	C	0.753551	0.000115544	50.601	0.0131505	0.00184868	1.1e-12	0.032743	0.022265	0.14139
rs178203	C	T	0.749551	9.78352e-05	42.8448	0.012014	0.00183543	5.9e-11	5.5e-05	0.022176	0.998031
rs180396	T	C	0.746657	6.85231e-05	30.0073	0.0100502	0.00183468	4.3e-08	0.013366	0.022042	0.544282
rs184332798	A	G	0.026113	7.03669e-05	30.8148	-0.0277737	0.00500326	2.8e-08	0.023298	0.061657	0.705551
rs1993092	C	T	0.389657	7.77569e-05	34.0512	-0.00951741	0.00163099	5.4e-09	-0.011116	0.019486	0.568394
rs2073869	T	C	0.166613	9.50168e-05	41.6104	-0.0138006	0.00213942	1.1e-10	0.01345	0.025043	0.591231
rs2106164	C	T	0.531731	7.88115e-05	34.5131	-0.00938934	0.00159824	4.2e-09	-0.007167	0.019553	0.713974
rs2185490	C	A	0.617654	7.41479e-05	32.4707	0.00937259	0.0016448	1.2e-08	-0.003828	0.019607	0.845195
rs2240857	G	T	0.141014	0.000109355	47.8902	0.0159314	0.00230213	4.5e-12	0.017142	0.027371	0.531152
rs2283	G	A	0.339277	6.98576e-05	30.5917	-0.00926961	0.00167594	3.2e-08	-0.030007	0.020049	0.134465
rs2352984	C	T	0.430943	0.000346323	151.702	0.0197571	0.00160408	7.4e-35	0.004913	0.019149	0.797529
rs2479968	G	A	0.05112	7.06123e-05	30.9222	0.0205886	0.00370246	2.7e-08	0.007096	0.053839	0.895129
rs249960	G	A	0.182119	7.45177e-05	32.6326	-0.0118041	0.00206636	1.1e-08	-0.004769	0.024518	0.84577
rs262890	G	A	0.298989	0.000132533	58.0419	0.0132392	0.00173776	2.6e-14	-0.030256	0.021008	0.149796
rs2646351	A	G	0.452916	7.10212e-05	31.1013	0.00891407	0.0015984	2.4e-08	0.010028	0.019151	0.600547
rs2678662	G	T	0.608337	0.000106456	46.6206	0.0111458	0.00163238	8.6e-12	0.009628	0.019212	0.616284
rs2725371	G	A	0.695652	0.00013353	58.4786	-0.0132649	0.00173462	2.1e-14	0.013136	0.020675	0.525199
rs3138499	C	A	0.518183	0.000106542	46.6581	0.0109638	0.00160508	8.5e-12	0.0079	0.01885	0.675147
rs34094119	G	A	0.525005	7.39449e-05	32.3818	0.00908177	0.00159595	1.3e-08	0.011692	0.019114	0.540764
rs34811474	A	G	0.230691	0.000110972	48.5982	-0.0131563	0.00188722	3.1e-12	0.000704	0.034695	0.983804
rs35797019	G	A	0.392335	7.31641e-05	32.0398	-0.00921437	0.00162787	1.5e-08	0.011662	0.019321	0.546136
rs362312	C	T	0.424168	7.96777e-05	34.8924	-0.00952438	0.00161239	3.5e-09	-0.013124	0.019541	0.501855
rs3754970	C	T	0.502922	8.40975e-05	36.8281	0.00970162	0.00159865	1.3e-09	0.010605	0.019092	0.578596
rs3810496	C	T	0.61619	7.41749e-05	32.4825	0.00937122	0.00164426	1.2e-08	0.005819	0.02148	0.786456
rs4076457	T	C	0.256946	6.9188e-05	30.2985	-0.0100378	0.00182359	3.7e-08	0.019716	0.022349	0.377676
rs4110177	A	G	0.367281	7.39289e-05	32.3748	0.00942719	0.00165683	1.3e-08	0.031101	0.019765	0.115581
rs4303732	C	T	0.40162	9.99689e-05	43.7793	-0.0107277	0.00162133	3.7e-11	0.004929	0.019107	0.796426
rs4339469	G	T	0.62921	0.000132119	57.8605	0.0125288	0.00164709	2.8e-14	0.000716	0.019749	0.97107
rs4469687	G	A	0.483936	6.99239e-05	30.6208	0.00879878	0.00159006	3.1e-08	0.027777	0.018891	0.141452
rs4788616	G	T	0.391065	8.90145e-05	38.9816	-0.0101834	0.00163103	4.3e-10	0.030188	0.019248	0.116801
rs494566	T	C	0.332086	8.2046e-05	35.9297	0.0101656	0.00169592	2e-09	0.001109	0.02058	0.957008
rs57555420	T	C	0.281686	7.52579e-05	32.9568	0.0101749	0.00177238	9.4e-09	-0.015375	0.021662	0.47787
rs58541850	A	G	0.058526	9.10467e-05	39.8716	0.0213895	0.00338741	2.7e-10	0.0983	0.054459	0.071079
rs6102912	C	T	0.41003	0.000104132	45.6026	-0.0109087	0.00161539	1.4e-11	0.005873	0.018773	0.754404
rs6125907	A	C	0.092033	7.85106e-05	34.3813	0.0161817	0.0027597	4.5e-09	-0.005454	0.034013	0.87258
rs61743199	G	A	0.071839	7.27847e-05	31.8736	0.0173842	0.0030792	1.6e-08	0.119922	0.058542	0.040532
rs61864793	C	T	0.251695	8.42482e-05	36.8941	-0.0111416	0.00183429	1.2e-09	0.036029	0.022341	0.10681
rs62145951	C	T	0.263053	0.000101461	44.4327	-0.0120253	0.00180403	2.6e-11	-7.7e-05	0.023769	0.997401
rs62199883	A	C	0.48612	0.000173002	75.7681	0.0138426	0.00159028	3.2e-18	-0.012128	0.019274	0.529218
rs6511708	C	T	0.664796	0.000117392	51.4102	-0.0120822	0.00168508	7.5e-13	-0.029842	0.020557	0.146585
rs68056254	T	G	0.150874	8.40143e-05	36.7917	0.0134953	0.00222488	1.3e-09	0.022299	0.026063	0.392214
rs6814554	A	G	0.47436	0.000163994	71.8223	0.0135276	0.00159621	2.4e-17	0.022119	0.019123	0.247393
rs6850494	C	A	0.386016	7.97815e-05	34.9379	0.00966003	0.00163429	3.4e-09	-0.030175	0.020358	0.138265
rs6895658	C	T	0.193239	9.49545e-05	41.5831	-0.0129815	0.0020131	1.1e-10	0.020481	0.024062	0.394669
rs6994132	C	T	0.579236	8.73437e-05	38.2498	-0.00996299	0.00161092	6.2e-10	-0.012846	0.019399	0.50787
rs7089973	A	C	0.380267	7.28259e-05	31.8917	0.00929464	0.00164586	1.6e-08	0.002425	0.020049	0.903712
rs7184800	A	G	0.302842	0.00013809	60.4758	-0.0134542	0.00173008	7.4e-15	-0.018696	0.020663	0.365578
rs73571431	T	C	0.109769	8.79044e-05	38.4954	0.0158383	0.00255272	5.5e-10	0.033452	0.030101	0.266395
rs73946726	A	C	0.02024	7.15868e-05	31.3491	0.0319589	0.00570793	2.2e-08	0.04696	0.073401	0.522337
rs749056	G	T	0.304306	7.64559e-05	33.4815	-0.0100199	0.00173165	7.2e-09	-0.037128	0.020453	0.069493
rs749671	A	G	0.371805	0.000103641	45.3876	-0.0110813	0.00164483	1.6e-11	0.001642	0.019722	0.933608
rs75499503	T	C	0.219683	0.000204265	89.4631	-0.0184284	0.00194834	3.1e-21	-0.009399	0.022608	0.677628
rs75641275	C	A	0.14333	0.000105584	46.2387	0.0154331	0.0022696	1e-11	0.001012	0.026332	0.969328
rs7708324	G	A	0.377232	8.31289e-05	36.4039	-0.00988735	0.00163872	1.6e-09	-0.004066	0.01972	0.836622
rs7798292	A	G	0.43452	8.39511e-05	36.764	-0.00972203	0.00160341	1.3e-09	0.015989	0.01915	0.40376
rs7899206	G	T	0.492382	8.41524e-05	36.8522	-0.00977557	0.00161031	1.3e-09	-0.001023	0.01985	0.958886
rs7921305	A	G	0.252545	8.96428e-05	39.2568	-0.0114732	0.00183116	3.7e-10	-0.038916	0.029466	0.186587
rs79373894	C	T	0.034386	9.55913e-05	41.862	-0.0287273	0.00444001	9.8e-11	0.029802	0.068969	0.665685
rs801733	C	A	0.357688	0.000129522	56.723	-0.0124933	0.00165881	5e-14	-0.009553	0.02001	0.6331
rs814197	G	T	0.466816	0.000102637	44.948	-0.0106837	0.00159355	2e-11	-0.014226	0.019063	0.455518
rs898751	T	C	0.493393	9.05733e-05	39.6643	0.0100214	0.00159121	3e-10	0.006894	0.019292	0.720828
rs9300594	G	A	0.253582	8.56416e-05	37.5044	0.0112022	0.0018292	9.1e-10	-0.000959	0.021813	0.964922
rs9471333	T	C	0.552259	9.72578e-05	42.5919	-0.0104272	0.00159773	6.7e-11	-0.024252	0.018999	0.201768
rs9834970	C	T	0.497804	7.19104e-05	31.4908	-0.0089082	0.00158744	2e-08	-0.010515	0.019024	0.580467
rs9867121	A	C	0.184147	7.36197e-05	32.2393	-0.0116984	0.00206031	1.4e-08	-0.051316	0.025679	0.045699
rs9867437	C	A	0.460371	9.44586e-05	41.3659	-0.0103044	0.00160214	1.3e-10	-0.00709	0.018854	0.706901
rs9880023	T	G	0.556427	8.21924e-05	35.9938	0.00964695	0.00160796	2e-09	0.027568	0.019512	0.157675

## Sheet: 3.5
Supplementary Table 3.5. The members of the International Headache Genetics Consortium (IHGC)
FirstName	MiddleName	LastName	Email	Department	Division	Institute	City	State	Country
Verneri		Anttila	verneri.anttila@gmail.com	Analytical and Translational Genetics Unit	Department of Medicine	Massachusetts General Hospital and Harvard Medical School	Boston	Massachusetts	USA
Verneri		Anttila		Program in Medical and Population Genetics		Broad Institute of MIT and Harvard	Cambridge	Massachusetts	USA
Verneri		Anttila		Stanley Center for Psychiatric Research		Broad Institute of MIT and Harvard	Cambridge	Massachusetts	USA
Ville		Artto	ville.artto@hus.fi	Department of Neurology		Helsinki University Central Hospital	Helsinki		Finland
Andrea	C	Belin	Andrea.Carmine.Belin@ki.se	Department of Neuroscience		Karolinska Institutet	Stockholm		Sweden
Anna		Bjornsdottir	abjorns@gmail.com	Neurology private practice		Laeknasetrid	Reykjavik		Iceland
Gyda		Bjornsdottir	gyda.bjornsdottir@decode.is			deCODE genetics/Amgen Inc.	Reykjavik		Iceland
Dorret	I	Boomsma	DI.Boomsma@psy.vu.nl	Netherlands Twin Register	Department of Biological Psychology	Vrije Universiteit	Amsterdam		the Netherlands
Sigrid		Børte	sigrid.borte@gmail.com	K.G. Jebsen Center for Genetic Epidemiology	Department of Public Health and Nursing, Faculty of Medicine and Health Sciences	Norwegian University of Science and Technology	Trondheim		Norway
Sigrid		Børte		Institute of Clinical Medicine	Faculty of Medicine	University of Oslo	Oslo		Norway
Sigrid		Børte		Research and Communication Unit for Musculoskeletal Health	Department of Research, Innovation and Education, Division of Clinical Neuroscience	Oslo University Hospital	Oslo		Norway
Mona	A	Chalmer	mona.ameri.chalmer@regionh.dk	Danish Headache Center	Department of Neurology	Copenhagen University Hospital	Copenhagen		Denmark
Daniel	I	Chasman	dchasman@research.bwh.harvard.edu	Department of Medicine	Division of Preventive Medicine	Brigham and Women's Hospital	Boston	Massachusetts	USA
Daniel	I	Chasman				Harvard Medical School	Boston	Massachusetts	USA
Bru		Cormand	bcormand@gmail.com	Department of Genetics	Spain Centre for Biomedical Network Research on Rare Diseases	University of Barcelona	Barcelona		Spain
Ester		Cuenca-Leon	estercuenca@gmail.com	Pediatric Neurology Research Group		Vall d'Hebron Research Institute	Barcelona		Spain
George		Davey-Smith	KZ.Davey-Smith@bristol.ac.uk	University of Bristol/Medical Research Council Integrative Epidemiology Unit		University of Bristol	Bristol		UK
Irene		de Boer	I.de_Boer.Neur@lumc.nl	Department of Neurology		Leiden University Medical Centre	Leiden		the Netherlands
Martin		Dichgans	Martin.Dichgans@med.uni-muenchen.de	Institute for Stroke and Dementia Research	University Hospital	LMU Munich	Munich		Germany
Martin		Dichgans				Munich Cluster for Systems Neurology	Munich		Germany
Tonu		Esko	tonu.esko@gmail.com	Estonian Biobank Registry	the Estonian Genome Center	University of Tartu	Tartu		Estonia
Tobias		Freilinger	tobias.kurth@charite.de	Department of Neurology		Klinikum Passau	Passau		Germany
Tobias		Freilinger		Department of Neurology and Epileptology	Hertie Institute for Clinical Brain Research	University of Tuebingen	Tuebingen		Germany
Padhraig		Gormley	padgorm@gmail.com			GSK Inc.	Cambridge	Massachusetts	USA
Lyn	R	Griffiths	lyn.griffiths@qut.edu.au		Centre for Genomics and Personalised Health	Queensland University of Technology	Brisbane	Queensland	Australia
Eija		Hämäläinen	eija.i.hamalainen@helsinki.fi	Institute for Molecular Medicine Finland	Helsinki Institute of Life Science	University of Helsinki	Helsinki		Finland
Thomas	F	Hansen	thomas.hansen@regionh.dk	Danish Headache Center	Department of Neurology	Copenhagen University Hospital	Copenhagen		Denmark
Thomas	F	Hansen			Novo Nordic Foundation Center for Protein Research	Copenhagen University	Copenhagen		Denmark
Aster	VE	Harder	A.V.E.Harder@lumc.nl	Department of Neurology		Leiden University Medical Centre	Leiden		the Netherlands
Aster	VE	Harder		Department of Human Genetics		Leiden University Medical Centre	Leiden		the Netherlands
Heidi		Hautakangas	heidi.hautakangas@helsinki.fi	Institute for Molecular Medicine Finland	Helsinki Institute of Life Science	University of Helsinki	Helsinki		Finland
Marjo		Hiekkala	marjo.hiekkala@helsinki.fi			Folkhälsan Research Center	Helsinki		Finland
Maria	G	Hrafnsdottir	mariahra@landspitali.is			Landspitali University Hospital	Reykjavik		Iceland
M. Arfan		Ikram	m.a.ikram@erasmusmc.nl	Department of Epidemiology		Erasmus University Medical Center	Rotterdam		the Netherlands
Marjo-Riitta		Järvelin	m.jarvelin@imperial.ac.uk	Department of Epidemiology and Biostatistics	MRC-PHE Centre for Environment and Health, School of Public Health	Imperial College London	London		UK
Marjo-Riitta		Järvelin		Center for Life Course Health Research	Faculty of Medicine	University of Oulu	Oulu		Finland
Marjo-Riitta		Järvelin			Unit of Primary Health Care	Oulu University Hospital, OYS	Oulu		Finland
Marjo-Riitta		Järvelin		Department of Life Sciences	College of Health and Life Sciences	Brunel University London	London		UK
Risto		Kajanne	risto.kajanne@helsinki.fi	Institute for Molecular Medicine Finland	Helsinki Institute of Life Science	University of Helsinki	Helsinki		Finland
Mikko		Kallela	mikko.kallela@pp.fimnet.fi	Department of Neurology		Helsinki University Central Hospital	Helsinki		Finland
Jaakko		Kaprio	jaakko.kaprio@helsinki.fi	Institute for Molecular Medicine Finland	Helsinki Institute of Life Science	University of Helsinki	Helsinki		Finland
Mari		Kaunisto	mari.kaunisto@helsinki.fi			Folkhälsan Research Center	Helsinki		Finland
Lisette	JA	Kogelman	lisette.kogelman@regionh.dk	Danish Headache Center	Department of Neurology	Copenhagen University Hospital	Copenhagen		Denmark
Espen	S	Kristoffersen	e.s.kristoffersen@medisin.uio.no	Research and Communication Unit for Musculoskeletal Health, Department of Research, Innovation and Education	Division of Clinical Neuroscience	Akershus University Hospital and University of Oslo	Oslo		Norway
Espen	S	Kristoffersen		Department of General Practice	Institute of Health and Society	University of Oslo	Oslo		Norway
Espen	S	Kristoffersen		Department of Neurology		Akershus University Hospital	Lørenskog		Norway
Christian		Kubisch	c.kubisch@uke.de		Institute of Human Genetics	University Medical Center Hamburg-Eppendorf	Hamburg		Germany
Mitja		Kurki	mitja.kurki@gmail.com	Psychiatric and Neurodevelopmental Genetics Unit	Department of Medicine	Massachusetts General Hospital	Boston	Massachusetts	USA
Tobias		Kurth	tobias.kurth@charite.de			Institute of Public Health	Charité – Universitätsmedizin		Berlin
Lenore		Launer	LaunerL@nia.nih.gov	Laboratory of Epidemiology and Population Sciences	Intramural Research Program	National Institute on Aging	Bethesda	Maryland	USA
Terho		Lehtimäki	terho.lehtimaki@tuni.fi	Department of Clinical Chemistry, Fimlab Laboratories, and Finnish Cardiovascular Research Center - Tampere	Faculty of Medicine and Health Technology	Tampere University	Tampere		Finland
Davor		Lessel	d.lessel@uke.de		Institute of Human Genetics	University Medical Center Hamburg-Eppendorf	Hamburg		Germany
Lannie		Ligthart	RSL.Ligthart@psy.vu.nl	Netherlands Twin Register	Department of Biological Psychology	Vrije Universiteit	Amsterdam		the Netherlands
Sigurdur	H	Magnusson	sigurdur.magnusson@decode.is			deCODE genetics/Amgen Inc.	Reykjavik		Iceland
Rainer		Malik	rainer.malik@med.uni-muenchen.de	Institute for Stroke and Dementia Research	University Hospital	LMU Munich	Munich		Germany
Bertram		Müller-Myhsok	bmm@mpipsykl.mpg.de			Max Planck Institute of Psychiatry	Munich		Germany
Carrie		Northover	cnorthover@23andme.com			23&Me Inc.	Mountain View	California	USA
Dale	R	Nyholt	d.nyholt@qut.edu.au	School of Biomedical Sciences, Faculty of Health	Centre for Genomics and Personalised Health, Centre for Data Science	Queensland University of Technology	Brisbane	Queensland	Australia
Jes		Olesen	jes.olesen@regionh.dk	Danish Headache Center	Department of Neurology	Copenhagen University Hospital	Copenhagen		Denmark
Aarno		Palotie	aarno.palotie@helsinki.fi	Institute for Molecular Medicine Finland	Helsinki Institute of Life Science	University of Helsinki	Helsinki		Finland
Aarno		Palotie				University of Helsinki	Helsinki		Finland
Priit		Palta	priit.palta@helsinki.fi	Institute for Molecular Medicine Finland	Helsinki Institute of Life Science	University of Helsinki	Helsinki		Finland
Linda	M	Pedersen	lindampedersen@hotmail.com	Department of Research, Innovation and Education	Division of Clinical Neuroscience	Oslo University Hospital	Oslo		Norway
Nancy		Pedersen	nancy.pedersen@ki.se	Department of Medical Epidemiology and Biostatistics		Karolinska Institutet	Stockholm		Sweden
Matti		Pirinen	matti.pirinen@helsinki.fi	Institute for Molecular Medicine Finland	Helsinki Institute of Life Science	University of Helsinki	Helsinki		Finland
Matti		Pirinen		Department of Mathematics and Statistics		University of Helsinki	Helsinki		Finland
Matti		Pirinen		Department of Public Health		University of Helsinki	Helsinki		Finland
Danielle		Posthuma	d.posthuma@vu.nl	Department of Complex Trait Genetics	Center for Neurogenomics and Cognitive Research	Neuroscience Campus Amsterdam, VU University	Amsterdam		The Netherlands
Patricia		Pozo-Rosich	ppozo@vhebron.net	Headache Unit	Neurology Department	Vall d'Hebron University Hospital	Barcelona		Spain
Alice		Pressman	pressmar@sutterhealth.org			Sutter Health	Sacramento	California	USA
Olli		Raitakari	olli.raitakari@utu.fi	Centre for Population Health Research	University of Turku	Turku University Hospital	Turku		Finland
Olli		Raitakari		Research Centre of Applied and Preventive Cardiovascular Medicine		University of Turku	Turku		Finland
Olli		Raitakari		Department of Clinical Physiology and Nuclear Medicine		Turku University Hospital	Turku		Finland
Caroline		Ran	Caroline.Ran@ki.se	Department of Neuroscience		Karolinska Institutet	Stockholm		Sweden
Gudrun	R	Sigurdardottir	gudrun@setrid.is	Neurology private practice		Laeknasetrid	Reykjavik		Iceland
Hreinn		Stefansson	hreinn.stefansson@decode.is			deCODE genetics/Amgen Inc.	Reykjavik		Iceland
Kari		Stefansson	kari.stefansson@decode.is			deCODE genetics/Amgen Inc.	Reykjavik		Iceland
Olafur	A	Sveinsson	olafur@setrid.is			Landspitali University Hospital	Reykjavik		Iceland
Gisela	M	Terwindt	G.M.Terwindt@lumc.nl	Department of Neurology		Leiden University Medical Centre	Leiden		the Netherlands
Thorgeir	E	Thorgeirsson	thorgeir.thorgeirsson@decode.is			deCODE genetics/Amgen Inc.	Reykjavik		Iceland
Arn	MJM	van den Maagdenberg	A.M.J.M.van_den_Maagdenberg@lumc.nl	Department of Neurology		Leiden University Medical Centre	Leiden		the Netherlands
Arn	MJM	van den Maagdenberg		Department of Human Genetics		Leiden University Medical Centre	Leiden		the Netherlands
Cornelia		van Duijn	c.vanduijn@erasmusmc.nl	Department of Epidemiology		Erasmus University Medical Centre	Rotterdam		the Netherlands
Maija		Wessman	maija.wessman@helsinki.fi			Folkhälsan Research Center	Helsinki		Finland
Maija		Wessman		Institute for Molecular Medicine Finland	Helsinki Institute of Life Science	University of Helsinki	Helsinki		Finland
Bendik	S	Winsvold	bendik.s.winsvold@gmail.com	Department of Research, Innovation and Education	Division of Clinical Neuroscience	Oslo University Hospital	Oslo		Norway
Bendik	S	Winsvold		K.G. Jebsen Center for Genetic Epidemiology	Department of Public Health and Nursing, Faculty of Medicine and Health Sciences	Norwegian University of Science and Technology	Trondheim		Norway
Bendik	S	Winsvold		Department of Neurology		Oslo University Hospital	Oslo		Norway
John-Anker		Zwart	j.a.zwart@medisin.uio.no	Department of Research, Innovation and Education	Division of Clinical Neuroscience	Oslo University Hospital	Oslo		Norway
John-Anker		Zwart		K.G. Jebsen Center for Genetic Epidemiology	Department of Public Health and Nursing, Faculty of Medicine and Health Sciences	Norwegian University of Science and Technology	Trondheim		Norway
John-Anker		Zwart		Institute of Clinical Medicine	Faculty of Medicine	University of Oslo	Oslo		Norway
